# Supplementary material for: Enhancing CRISPR deletion via pharmacological delay of DNA-PKcs
Source: HighWire-hosted journal article supplement (doi:10.1101/gr.265736.120), 2021-02-11
Supplement: Supplemental_File_S1.xlsx [file Supplemental_File_S1.xlsx]

## Sheet: Legend
Supplemental File S1. Library design including sequences and genomic coordinates.
For reproducibility, copy the table sheet in .tsv format when using the Supplemental_Code

## Sheet: Supplemental_File_S1
ID	Gene	target	sgRNA1_sequence	sgRNA2_sequence	chr1	start1	end1	chr2	start2	end2
pgrna0	RPL3	Essential	TTAATTCCGAGGAAACAACG	TCAAACTTAGTGAAAAGCCG	chr22	39716676	39716699	chr22	39715834	39715857
pgrna1	RPL3	Essential	TCCATTATTAGAAATCCTGG	TCAAACTTAGTGAAAAGCCG	chr22	39717190	39717213	chr22	39715834	39715857
pgrna2	RPL3	Essential	TTAATTCCGAGGAAACAACG	ACCCTTAGCCCACCTCTCCG	chr22	39716676	39716699	chr22	39715851	39715874
pgrna3	RPL3	Essential	GGAGTCCTCCTGAATATCTG	TTAATTCCGAGGAAACAACG	chr22	39715158	39715181	chr22	39716676	39716699
pgrna4	RPL3	Essential	GTGCCCCTAAAGCAAACCCC	TTAATTCCGAGGAAACAACG	chr22	39715486	39715509	chr22	39716676	39716699
pgrna5	RPL3	Essential	TTAATTCCGAGGAAACAACG	CTGACCCTCAGAATCAAGCG	chr22	39716676	39716699	chr22	39716122	39716145
pgrna6	RPL3	Essential	TTAATTCCGAGGAAACAACG	TGACCCTCAGAATCAAGCGC	chr22	39716676	39716699	chr22	39716121	39716144
pgrna7	RPL3	Essential	TGAATATTCATGTTTCCTTA	TCAAACTTAGTGAAAAGCCG	chr22	39717317	39717340	chr22	39715834	39715857
pgrna8	RPL3	Essential	ATTCCGAGGAAACAACGAGG	TCAAACTTAGTGAAAAGCCG	chr22	39716673	39716696	chr22	39715834	39715857
pgrna9	RPL3	Essential	TGAATATTCATGTTTCCTTA	ACCCTTAGCCCACCTCTCCG	chr22	39717317	39717340	chr22	39715851	39715874
pgrna10	RPL8	Essential	GCACCGGCATCCTCTCAGGA	AGCACTGTCGAGCACACGCG	chr8	146017646	146017669	chr8	146018716	146018739
pgrna11	RPL8	Essential	GGGGCGACTCACGATTAGCG	TCGACGCCCGACCTCTCCAA	chr8	146017528	146017551	chr8	146018310	146018333
pgrna12	RPL8	Essential	GCACCGGCATCCTCTCAGGA	CGACAGTGCTCACTCAGCCA	chr8	146017646	146017669	chr8	146018703	146018726
pgrna13	RPL8	Essential	GCACCGGCATCCTCTCAGGA	TCGACGCCCGACCTCTCCAA	chr8	146017646	146017669	chr8	146018310	146018333
pgrna14	RPL8	Essential	GTGCCCGCTGTTGCTCACAG	GCACCGGCATCCTCTCAGGA	chr8	146018899	146018922	chr8	146017646	146017669
pgrna15	RPL8	Essential	GGGGCGACTCACGATTAGCG	AGCACTGTCGAGCACACGCG	chr8	146017528	146017551	chr8	146018716	146018739
pgrna16	RPL8	Essential	GCCGAGAGAGTTGTACCGGG	AGCACTGTCGAGCACACGCG	chr8	146016984	146017007	chr8	146018716	146018739
pgrna17	RPL8	Essential	GGGGCGACTCACGATTAGCG	CGACAGTGCTCACTCAGCCA	chr8	146017528	146017551	chr8	146018703	146018726
pgrna18	RPL8	Essential	GTGCCGCTCAGCGAAATCCA	AGCACTGTCGAGCACACGCG	chr8	146017400	146017423	chr8	146018716	146018739
pgrna19	RPL8	Essential	GCCGAGAGAGTTGTACCGGG	CGACAGTGCTCACTCAGCCA	chr8	146016984	146017007	chr8	146018703	146018726
pgrna20	RPL13	Essential	AGTTTTACCAGGAGGAAGCG	ATTGTGGGTGATGAGCTAAG	chr16	89626146	89626169	chr16	89628267	89628290
pgrna21	RPL13	Essential	GAGACACGTTTGCAGCGCAA	GCTGCGCCTTGGCTTGCGGG	chr16	89626708	89626731	chr16	89627514	89627537
pgrna22	RPL13	Essential	AGTTTTACCAGGAGGAAGCG	CATTCTCCGGAATCGCTGTA	chr16	89626146	89626169	chr16	89627847	89627870
pgrna23	RPL13	Essential	GCTGCGCCTTGGCTTGCGGG	AGTTTTACCAGGAGGAAGCG	chr16	89627514	89627537	chr16	89626146	89626169
pgrna24	RPL13	Essential	GGTGGAGAGAAGCGCAGCGG	AGTTTTACCAGGAGGAAGCG	chr16	89627609	89627632	chr16	89626146	89626169
pgrna25	RPL13	Essential	GCTTCTCTCCACCAGACGTA	AGTTTTACCAGGAGGAAGCG	chr16	89627619	89627642	chr16	89626146	89626169
pgrna26	RPL13	Essential	GAGACACGTTTGCAGCGCAA	ATTGTGGGTGATGAGCTAAG	chr16	89626708	89626731	chr16	89628267	89628290
pgrna27	RPL13	Essential	GAGACACGTTTGCAGCGCAA	CATTCTCCGGAATCGCTGTA	chr16	89626708	89626731	chr16	89627847	89627870
pgrna28	RPL14	Essential	CCAGGCTCTTGATCTAATGG	ATTCATTATTGCCATCTGCA	chr3	40497614	40497637	chr3	40499525	40499548
pgrna29	RPL14	Essential	CCAGGCTCTTGATCTAATGG	CATCAGCCATCCAGCTCCAG	chr3	40497614	40497637	chr3	40499100	40499123
pgrna30	RPL14	Essential	CCAGGCTCTTGATCTAATGG	CTTAAGCTAGAGCCAGTTAT	chr3	40497614	40497637	chr3	40499680	40499703
pgrna31	RPL14	Essential	TGGAATCTAGAAGGGTTTGT	ATTCATTATTGCCATCTGCA	chr3	40498354	40498377	chr3	40499525	40499548
pgrna32	RPL14	Essential	TGGAATCTAGAAGGGTTTGT	CTTAAGCTAGAGCCAGTTAT	chr3	40498354	40498377	chr3	40499680	40499703
pgrna33	RPL14	Essential	GCGATAGAAGGACATCATGT	ATTCATTATTGCCATCTGCA	chr3	40498285	40498308	chr3	40499525	40499548
pgrna34	RPL14	Essential	GCGATAGAAGGACATCATGT	CTTAAGCTAGAGCCAGTTAT	chr3	40498285	40498308	chr3	40499680	40499703
pgrna35	RPL14	Essential	TGAGATTAGGAGAGAACGTG	ATTCATTATTGCCATCTGCA	chr3	40498449	40498472	chr3	40499525	40499548
pgrna36	RPL14	Essential	GCCTGAACACCTAAAATTGG	CCAGGCTCTTGATCTAATGG	chr3	40499367	40499390	chr3	40497614	40497637
pgrna37	RPL14	Essential	TGAGATTAGGAGAGAACGTG	CTTAAGCTAGAGCCAGTTAT	chr3	40498449	40498472	chr3	40499680	40499703
pgrna38	RPL18A	Essential	GCTAACAGTGAGCCGAAACG	ATAAGAACCTGAGGGAGCAG	chr19	17971181	17971204	chr19	17970108	17970131
pgrna39	RPL18A	Essential	GATTGCAGTTGGGAAAACGG	TCCAGTTCATAAGAACCTGA	chr19	17971572	17971595	chr19	17970116	17970139
pgrna40	RPL18A	Essential	GTAAACACCGCAGCCACCCG	GCTAACAGTGAGCCGAAACG	chr19	17970369	17970392	chr19	17971181	17971204
pgrna41	RPL18A	Essential	GATTGCAGTTGGGAAAACGG	ATAAGAACCTGAGGGAGCAG	chr19	17971572	17971595	chr19	17970108	17970131
pgrna42	RPL18A	Essential	ATAAGAACCTGAGGGAGCAG	ACTCCGGGTCTTCTTCCCGG	chr19	17970108	17970131	chr19	17971008	17971031
pgrna43	RPL18A	Essential	GTAAACACCGCAGCCACCCG	GATTGCAGTTGGGAAAACGG	chr19	17970369	17970392	chr19	17971572	17971595
pgrna44	RPL18A	Essential	GTAAACACCGCAGCCACCCG	ACTCCGGGTCTTCTTCCCGG	chr19	17970369	17970392	chr19	17971008	17971031
pgrna45	RPL18A	Essential	ATAAGAACCTGAGGGAGCAG	CACGCATCGCTCTCTCCACG	chr19	17970108	17970131	chr19	17970950	17970973
pgrna46	RPL18A	Essential	GTAAACACCGCAGCCACCCG	CACGCATCGCTCTCTCCACG	chr19	17970369	17970392	chr19	17970950	17970973
pgrna47	RPL18A	Essential	GCTAACAGTGAGCCGAAACG	TCCAGTTCATAAGAACCTGA	chr19	17971181	17971204	chr19	17970116	17970139
pgrna48	RPL21	Essential	CCACCCATATATTTAACACC	TAGAAAGGCATCAGGCCACG	chr13	27824693	27824716	chr13	27826088	27826111
pgrna49	RPL21	Essential	GCAGTCATATCTGGTAAGGA	ATGTTGGGTGAGGACTTAAG	chr13	27824757	27824780	chr13	27826152	27826175
pgrna50	RPL21	Essential	AGGTGTAGTGAATAAAACAA	TAGAAAGGCATCAGGCCACG	chr13	27824670	27824693	chr13	27826088	27826111
pgrna51	RPL21	Essential	GGTAAGGAGGGGACAATAAA	TAGAAAGGCATCAGGCCACG	chr13	27824745	27824768	chr13	27826088	27826111
pgrna52	RPL21	Essential	GCAGTCATATCTGGTAAGGA	TAGAAAGGCATCAGGCCACG	chr13	27824757	27824780	chr13	27826088	27826111
pgrna53	RPL21	Essential	CCACCCATATATTTAACACC	ATGTTGGGTGAGGACTTAAG	chr13	27824693	27824716	chr13	27826152	27826175
pgrna54	RPL21	Essential	GTATTGACCATTATTAAACC	TAGAAAGGCATCAGGCCACG	chr13	27824711	27824734	chr13	27826088	27826111
pgrna55	RPL21	Essential	CCACCCATATATTTAACACC	TTCCAGGTAGGGCCTACGCG	chr13	27824693	27824716	chr13	27825716	27825739
pgrna56	RPL21	Essential	AGGTGTAGTGAATAAAACAA	ATGTTGGGTGAGGACTTAAG	chr13	27824670	27824693	chr13	27826152	27826175
pgrna57	RPL21	Essential	GGTAAGGAGGGGACAATAAA	ATGTTGGGTGAGGACTTAAG	chr13	27824745	27824768	chr13	27826152	27826175
pgrna58	RPL23	Essential	GTTCTGTCCAGGGCGTACAG	CCACGTCCTGTGGATATAAA	chr17	37010908	37010931	chr17	37009351	37009374
pgrna59	RPL23	Essential	GTTCTGTCCAGGGCGTACAG	TATCCAGACTACATTCACGT	chr17	37010908	37010931	chr17	37009731	37009754
pgrna60	RPL23	Essential	AGAACCCAGAGAATAAGGGG	CCACGTCCTGTGGATATAAA	chr17	37010830	37010853	chr17	37009351	37009374
pgrna61	RPL23	Essential	GTTCTGTCCAGGGCGTACAG	CTATTCGCGGAGCGATCTCG	chr17	37010908	37010931	chr17	37009708	37009731
pgrna62	RPL23	Essential	GTTCTGTCCAGGGCGTACAG	TGCAAGGCATAAAACCGCAG	chr17	37010908	37010931	chr17	37009633	37009656
pgrna63	RPL23	Essential	AGAACCCAGAGAATAAGGGG	CTATTCGCGGAGCGATCTCG	chr17	37010830	37010853	chr17	37009708	37009731
pgrna64	RPL23	Essential	AGAACCCAGAGAATAAGGGG	TGCAAGGCATAAAACCGCAG	chr17	37010830	37010853	chr17	37009633	37009656
pgrna65	RPL23	Essential	GTTCTGTCCAGGGCGTACAG	CCACCGCGAGAGCACTGCCA	chr17	37010908	37010931	chr17	37009801	37009824
pgrna66	RPL23	Essential	AGAACCCAGAGAATAAGGGG	CCACCGCGAGAGCACTGCCA	chr17	37010830	37010853	chr17	37009801	37009824
pgrna67	RPL23	Essential	GAGGGAGAACAAGCTCTAAA	CCACGTCCTGTGGATATAAA	chr17	37010353	37010376	chr17	37009351	37009374
pgrna68	RPL23A	Essential	TTAGAATGAGGTGCCCACCG	AATTCGTTCGCTCTGCGGCG	chr17	27045369	27045392	chr17	27047091	27047114
pgrna69	RPL23A	Essential	TTAGAATGAGGTGCCCACCG	CTACCGGAACTCAGCCCACG	chr17	27045369	27045392	chr17	27047212	27047235
pgrna70	RPL23A	Essential	TTAGAATGAGGTGCCCACCG	AAGGCACTAAAGCTTCATGG	chr17	27045369	27045392	chr17	27046818	27046841
pgrna71	RPL23A	Essential	TTAGAATGAGGTGCCCACCG	ACCTAACTACCGTTCCCAGA	chr17	27045369	27045392	chr17	27046889	27046912
pgrna72	RPL23A	Essential	GTGTCAGAGGAAGTACAAGG	AATTCGTTCGCTCTGCGGCG	chr17	27046002	27046025	chr17	27047091	27047114
pgrna73	RPL23A	Essential	GTGTCAGAGGAAGTACAAGG	CTACCGGAACTCAGCCCACG	chr17	27046002	27046025	chr17	27047212	27047235
pgrna74	RPL23A	Essential	GTGTCAGAGGAAGTACAAGG	AAGGCACTAAAGCTTCATGG	chr17	27046002	27046025	chr17	27046818	27046841
pgrna75	RPL23A	Essential	GTGTCAGAGGAAGTACAAGG	ACCTAACTACCGTTCCCAGA	chr17	27046002	27046025	chr17	27046889	27046912
pgrna76	RPL23A	Essential	GGGCCGCAGCTGGTTTACCG	TTAGAATGAGGTGCCCACCG	chr17	27047064	27047087	chr17	27045369	27045392
pgrna77	RPL30	Essential	CTAGGCCTATTGTCAGAGCT	CTAGCGGTACCAATAGCAAC	chr8	99058946	99058969	chr8	99057881	99057904
pgrna78	RPL30	Essential	GGCCCGGAAGACGATTCACG	TGAAGAGACCTAAGTTACCT	chr8	99057534	99057557	chr8	99058976	99058999
pgrna79	RPL30	Essential	CTAGGCCTATTGTCAGAGCT	CGAGGCGCTTAGAACCCGGA	chr8	99058946	99058969	chr8	99058333	99058356
pgrna80	RPL30	Essential	TGAAGAGACCTAAGTTACCT	CTAGCGGTACCAATAGCAAC	chr8	99058976	99058999	chr8	99057881	99057904
pgrna81	RPL30	Essential	CTAGGCCTATTGTCAGAGCT	TTAGGATCCGGAGTTACAAA	chr8	99058946	99058969	chr8	99057657	99057680
pgrna82	RPL30	Essential	GGCCCGGAAGACGATTCACG	CTAGGCCTATTGTCAGAGCT	chr8	99057534	99057557	chr8	99058946	99058969
pgrna83	RPL30	Essential	CTAGGCCTATTGTCAGAGCT	TCGAGGCGCTTAGAACCCGG	chr8	99058946	99058969	chr8	99058332	99058355
pgrna84	RPL30	Essential	CTAGGCCTATTGTCAGAGCT	TCCCCGCGCTGCCTAAACCT	chr8	99058946	99058969	chr8	99057693	99057716
pgrna85	RPL30	Essential	TGAAGAGACCTAAGTTACCT	CGAGGCGCTTAGAACCCGGA	chr8	99058976	99058999	chr8	99058333	99058356
pgrna86	RPL30	Essential	TGAAGAGACCTAAGTTACCT	TTAGGATCCGGAGTTACAAA	chr8	99058976	99058999	chr8	99057657	99057680
pgrna87	RPL34	Essential	GGGTCAGGTGATCCACAACG	GAATGCAGCAAAGTCCCGGG	chr4	109540718	109540741	chr4	109541975	109541998
pgrna88	RPL34	Essential	GGGTCAGGTGATCCACAACG	GTTTGGAGACTAACGAGTTG	chr4	109540718	109540741	chr4	109542008	109542031
pgrna89	RPL34	Essential	GATGGATTAGAAATACTAGA	GAATGCAGCAAAGTCCCGGG	chr4	109540624	109540647	chr4	109541975	109541998
pgrna90	RPL34	Essential	GGGTCAGGTGATCCACAACG	GCTTCATAAATCACTCGCAC	chr4	109540718	109540741	chr4	109542248	109542271
pgrna91	RPL34	Essential	GGGTCAGGTGATCCACAACG	GCGAAACCACCCGAACTCGC	chr4	109540718	109540741	chr4	109542133	109542156
pgrna92	RPL34	Essential	GGGTCAGGTGATCCACAACG	TCATTAGGATTAAACGACGT	chr4	109540718	109540741	chr4	109542632	109542655
pgrna93	RPL34	Essential	GAATGCAGCAAAGTCCCGGG	ATCTTTGTCACAACACCAGA	chr4	109541975	109541998	chr4	109540508	109540531
pgrna94	RPL34	Essential	GATCATGACATAACATGGCA	GAATGCAGCAAAGTCCCGGG	chr4	109541139	109541162	chr4	109541975	109541998
pgrna95	RPL34	Essential	GATGGATTAGAAATACTAGA	GCTTCATAAATCACTCGCAC	chr4	109540624	109540647	chr4	109542248	109542271
pgrna96	RPL34	Essential	GGGTCAGGTGATCCACAACG	ACAGGCGTGCTGTGAAAACG	chr4	109540718	109540741	chr4	109542080	109542103
pgrna97	CCND1	Essential	GGTGGCGACGATCTTCCGCA	CCTCACCCCCTAAATCCCGG	chr11	69456244	69456267	chr11	69455580	69455603
pgrna98	CCND1	Essential	GGCCGCAGCTAAGGGCCGCG	CCTCACCCCCTAAATCCCGG	chr11	69456820	69456843	chr11	69455580	69455603
pgrna99	CCND1	Essential	GCGTCGTTGCAAATGCCCAA	GGTGGCGACGATCTTCCGCA	chr11	69455256	69455279	chr11	69456244	69456267
pgrna100	CCND1	Essential	GCATTTCCAAGAACGCCACG	GGTGGCGACGATCTTCCGCA	chr11	69455434	69455457	chr11	69456244	69456267
pgrna101	CCND1	Essential	GCGTCGTTGCAAATGCCCAA	GGCCGCAGCTAAGGGCCGCG	chr11	69455256	69455279	chr11	69456820	69456843
pgrna102	EIF3G	Essential	GATTCATGATGACTCCCCAG	GCACCTTCAGGATTGAGACC	chr19	10231716	10231739	chr19	10229373	10229396
pgrna103	EIF3G	Essential	GATTCATGATGACTCCCCAG	CTCCTGATCCCCATGACCCA	chr19	10231716	10231739	chr19	10229665	10229688
pgrna104	EIF3G	Essential	GATTCATGATGACTCCCCAG	GATGACGCCTACAGCAAAAG	chr19	10231716	10231739	chr19	10229923	10229946
pgrna105	EIF3G	Essential	GCACCTTCAGGATTGAGACC	TGAATCACTTCGACTGAGGA	chr19	10229373	10229396	chr19	10231699	10231722
pgrna106	EIF3G	Essential	TGAATCACTTCGACTGAGGA	CTCCTGATCCCCATGACCCA	chr19	10231699	10231722	chr19	10229665	10229688
pgrna107	EIF5B	Essential	GTGTACCCGGAGGAAAGCAA	GGTACGTTAGAGTTATGGGG	chr2	99952942	99952965	chr2	99954503	99954526
pgrna108	EIF5B	Essential	GTGTACCCGGAGGAAAGCAA	CTACCCCGCTCCTCAGGCCG	chr2	99952942	99952965	chr2	99954283	99954306
pgrna109	EIF5B	Essential	GTGTACCCGGAGGAAAGCAA	CACCCTCGCCAAGAGTAGCG	chr2	99952942	99952965	chr2	99954383	99954406
pgrna110	EIF5B	Essential	GTTCGCAGCCAATAAGGAGG	GGTACGTTAGAGTTATGGGG	chr2	99952812	99952835	chr2	99954503	99954526
pgrna111	EIF5B	Essential	GGTACGTTAGAGTTATGGGG	TCAGCTTCACCCTCAAAGCG	chr2	99954503	99954526	chr2	99953347	99953370
pgrna112	HNRNPM	Essential	GTACTAGGCATAATGCTGTA	GGAAGCATCGACTTGTGCCC	chr19	8508439	8508462	chr19	8510876	8510899
pgrna113	HNRNPM	Essential	GCGAACTTTGTAGGCAACAA	GGAAGCATCGACTTGTGCCC	chr19	8509373	8509396	chr19	8510876	8510899
pgrna114	HNRNPM	Essential	GTACTAGGCATAATGCTGTA	AGTCAACGGTAACCGAGCGA	chr19	8508439	8508462	chr19	8510464	8510487
pgrna115	HNRNPM	Essential	GTACTAGGCATAATGCTGTA	AGGCGGTACGGGAACAGCCG	chr19	8508439	8508462	chr19	8510102	8510125
pgrna116	HNRNPM	Essential	GCGAACTTTGTAGGCAACAA	AGTCAACGGTAACCGAGCGA	chr19	8509373	8509396	chr19	8510464	8510487
pgrna117	KARS	Essential	GCTGCCATCCACTTTCACCT	CAAGAAGCCAGTTAGCCCGT	chr16	75681495	75681518	chr16	75683484	75683507
pgrna118	KARS	Essential	GCTGCCATCCACTTTCACCT	ACAAGAAGCCAGTTAGCCCG	chr16	75681495	75681518	chr16	75683485	75683508
pgrna119	KARS	Essential	CAAGAAGCCAGTTAGCCCGT	CGGGCACTCTCGATGCGCCG	chr16	75683484	75683507	chr16	75681629	75681652
pgrna120	KARS	Essential	GCTGCCATCCACTTTCACCT	CATTGACTAGAATATTGACA	chr16	75681495	75681518	chr16	75683091	75683114
pgrna121	KARS	Essential	CAAGAAGCCAGTTAGCCCGT	CGTGGAGATGAAATCACCCG	chr16	75683484	75683507	chr16	75682000	75682023
pgrna122	NFE2L2	Essential	GTACCAATGAGTGCAAAGCG	GTTACTTTGGTGACCCCGCA	chr2	178257677	178257700	chr2	178257044	178257067
pgrna123	NFE2L2	Essential	GTACCAATGAGTGCAAAGCG	CTAAGCAAATTGCTGTTGGA	chr2	178257677	178257700	chr2	178256452	178256475
pgrna124	NFE2L2	Essential	GTACCAATGAGTGCAAAGCG	CTAATTCTTATGCAAGACAC	chr2	178257677	178257700	chr2	178256710	178256733
pgrna125	NFE2L2	Essential	GGTCTTGGAATGGGTAGCAG	GTTACTTTGGTGACCCCGCA	chr2	178258110	178258133	chr2	178257044	178257067
pgrna126	NFE2L2	Essential	GTTACTTTGGTGACCCCGCA	AGTCCACTCTCTCGAAAGAG	chr2	178257044	178257067	chr2	178257913	178257936
pgrna127	NHP2L1	Essential	GCCAGGCCTTAACTGTTTAG	AATCCATCTGCAGGTCCCAG	chr22	42086006	42086029	chr22	42087047	42087070
pgrna128	NHP2L1	Essential	GGTACACCAGGCATAAAACA	GCCAGGCCTTAACTGTTTAG	chr22	42086919	42086942	chr22	42086006	42086029
pgrna129	NHP2L1	Essential	GCCAGGCCTTAACTGTTTAG	AATTTGCAAGTATAGCCCCT	chr22	42086006	42086029	chr22	42087062	42087085
pgrna130	NHP2L1	Essential	AATCCATCTGCAGGTCCCAG	AACGAGAAAGGCATGTTGAG	chr22	42087047	42087070	chr22	42086188	42086211
pgrna131	NHP2L1	Essential	GCCACTAAACAGTTAAGGCC	AATCCATCTGCAGGTCCCAG	chr22	42086005	42086028	chr22	42087047	42087070
pgrna132	SNRNP200	Essential	GTTCAGCTGGGTGAAAACGA	GTATGGGAGACAAGGCTCAA	chr2	96971829	96971852	chr2	96970477	96970500
pgrna133	SNRNP200	Essential	GTTCAGCTGGGTGAAAACGA	GGAGAGCCACGAAAACGAAG	chr2	96971829	96971852	chr2	96971017	96971040
pgrna134	SNRNP200	Essential	GTTCAGCTGGGTGAAAACGA	GCTGGGGTAACTATGATAGT	chr2	96971829	96971852	chr2	96970655	96970678
pgrna135	SNRNP200	Essential	GTTGCCAAAGAGGAAGGAAC	GTATGGGAGACAAGGCTCAA	chr2	96971593	96971616	chr2	96970477	96970500
pgrna136	SNRNP200	Essential	GTTGCCAAAGAGGAAGGAAC	GGAGAGCCACGAAAACGAAG	chr2	96971593	96971616	chr2	96971017	96971040
pgrna137	TP53	Essential	GCTCCCCCTACCGAGTCCCG	AGTATATCTCATCTTCCCGG	chr17	7591541	7591564	chr17	7589632	7589655
pgrna138	TP53	Essential	GCTCCCCCTACCGAGTCCCG	TGTGGAGCCAAACAATAACA	chr17	7591541	7591564	chr17	7590008	7590031
pgrna139	TP53	Essential	AAGAGGCCCGTAGCGACCCG	AGTATATCTCATCTTCCCGG	chr17	7591758	7591781	chr17	7589632	7589655
pgrna140	TP53	Essential	TTATTCATCGGGGAAGCGTG	AGTATATCTCATCTTCCCGG	chr17	7592044	7592067	chr17	7589632	7589655
pgrna141	TP53	Essential	AAGAGGCCCGTAGCGACCCG	TGTGGAGCCAAACAATAACA	chr17	7591758	7591781	chr17	7590008	7590031
pgrna142	RPS15A	Essential	GTAAAAGCTGCATCGTGCCG	AATAAAAATTAAGGCCCGCG	chr16	18801195	18801218	chr16	18802155	18802178
pgrna143	RPS15A	Essential	GTAAAAGCTGCATCGTGCCG	TATCCAGGTACCATGCTAGA	chr16	18801195	18801218	chr16	18802681	18802704
pgrna144	RPS15A	Essential	AATAAAAATTAAGGCCCGCG	AGACACCAACCATTACACTG	chr16	18802155	18802178	chr16	18800491	18800514
pgrna145	RPS15A	Essential	TATCCAGGTACCATGCTAGA	AGACACCAACCATTACACTG	chr16	18802681	18802704	chr16	18800491	18800514
pgrna146	RPS15A	Essential	GTAAAAGCTGCATCGTGCCG	ACGAAGCTGGAAGAACCGGC	chr16	18801195	18801218	chr16	18802611	18802634
pgrna147	ADAT1	Essential	ACTTATTCCCGGCAATCCAA	TCGACCTGAAATTAAACCAG	chr16	75658534	75658557	chr16	75656357	75656380
pgrna148	ADAT1	Essential	ACTTATTCCCGGCAATCCAA	CCTGTGACTTGAAAGTCAGA	chr16	75658534	75658557	chr16	75656211	75656234
pgrna149	ADAT1	Essential	ACTTATTCCCGGCAATCCAA	AGTTTTCAAGATCTAGGAGG	chr16	75658534	75658557	chr16	75656565	75656588
pgrna150	ADAT1	Essential	TAGCTGCCTGGATACTTCAG	TCGACCTGAAATTAAACCAG	chr16	75658561	75658584	chr16	75656357	75656380
pgrna151	ADAT1	Essential	TAGCTGCCTGGATACTTCAG	CCTGTGACTTGAAAGTCAGA	chr16	75658561	75658584	chr16	75656211	75656234
pgrna152	AKT1	Essential	GGTTGGAGAAAGACTCGCCG	TGTCAGGTATCCCACCCAAG	chr14	105261409	105261432	chr14	105263386	105263409
pgrna153	AKT1	Essential	GCAGCTACACTCACAAAAGG	GGTTGGAGAAAGACTCGCCG	chr14	105262641	105262664	chr14	105261409	105261432
pgrna154	AKT1	Essential	TGTCAGGTATCCCACCCAAG	CCTCCATTCTGGCGGCGCCG	chr14	105263386	105263409	chr14	105261705	105261728
pgrna155	AKT1	Essential	GTATACACCAGGCCAGCACA	TGTCAGGTATCCCACCCAAG	chr14	105260762	105260785	chr14	105263386	105263409
pgrna156	AKT1	Essential	TGTCAGGTATCCCACCCAAG	TGTAGACTTCTCATACACCA	chr14	105263386	105263409	chr14	105260938	105260961
pgrna157	ALDH16A1	Essential	ACACCATCGTCAAATCCGTG	AGAGGAGTTCAGGAAAACCG	chr19	49954996	49955019	chr19	49956931	49956954
pgrna158	ALDH16A1	Essential	TTACAGTTCGGCACGTAGGA	AGAGGAGTTCAGGAAAACCG	chr19	49955046	49955069	chr19	49956931	49956954
pgrna159	ALDH16A1	Essential	ACACCATCGTCAAATCCGTG	AAAACCGCGGAAACACTACG	chr19	49954996	49955019	chr19	49956918	49956941
pgrna160	ALDH16A1	Essential	ACACCATCGTCAAATCCGTG	CATTTGCAGGAACCCCACGA	chr19	49954996	49955019	chr19	49957779	49957802
pgrna161	ALDH16A1	Essential	TTACAGTTCGGCACGTAGGA	AAAACCGCGGAAACACTACG	chr19	49955046	49955069	chr19	49956918	49956941
pgrna162	ATM	Essential	GCATTTGTCTGCATGACGGA	CTAACGGAGAAAAGAAGCCG	chr11	108092896	108092919	chr11	108093807	108093830
pgrna163	ATM	Essential	GCATTTGTCTGCATGACGGA	GATGGTAGAAGCCTTCCAGA	chr11	108092896	108092919	chr11	108094560	108094583
pgrna164	ATM	Essential	GCATTTGTCTGCATGACGGA	CATGCGCATCCAGTATCACG	chr11	108092896	108092919	chr11	108093678	108093701
pgrna165	ATM	Essential	GCATTTGTCTGCATGACGGA	AGCCCAAGCTCTTAACCGCG	chr11	108092896	108092919	chr11	108094262	108094285
pgrna166	ATM	Essential	GCATTTGTCTGCATGACGGA	GGTCAAAGTAGTATCAACCG	chr11	108092896	108092919	chr11	108093876	108093899
pgrna167	BECN1	Essential	GGACTCTCCATCATCAGACG	GGAAGCTTACGAGAATCAGT	chr17	40985877	40985900	chr17	40984953	40984976
pgrna168	BECN1	Essential	GGACTCTCCATCATCAGACG	GCAAATTGATCCCCAGAGTA	chr17	40985877	40985900	chr17	40984903	40984926
pgrna169	BECN1	Essential	GGAAGCTTACGAGAATCAGT	TCTGATGATGGAGAGTCCCG	chr17	40984953	40984976	chr17	40985882	40985905
pgrna170	BECN1	Essential	GGAAGCTTACGAGAATCAGT	ACCAGCTCTGAGCTTCCGCT	chr17	40984953	40984976	chr17	40985787	40985810
pgrna171	BECN1	Essential	GCAAATTGATCCCCAGAGTA	TCTGATGATGGAGAGTCCCG	chr17	40984903	40984926	chr17	40985882	40985905
pgrna172	BRCA2	Essential	ATGGTCCCTAAGGAACCAAG	TGCTGATGGGAATTACCAGG	chr13	32888436	32888459	chr13	32890222	32890245
pgrna173	BRCA2	Essential	GTGAGGTACCTTGCTCCGCA	TGCTGATGGGAATTACCAGG	chr13	32889017	32889040	chr13	32890222	32890245
pgrna174	BRCA2	Essential	CTTCACTTAGTGGTAGTGGG	TGCTGATGGGAATTACCAGG	chr13	32889171	32889194	chr13	32890222	32890245
pgrna175	BRCA2	Essential	ATGGTCCCTAAGGAACCAAG	TCACGCTAACCAGTGACGCG	chr13	32888436	32888459	chr13	32890281	32890304
pgrna176	BRCA2	Essential	TCACTTAGTGGTAGTGGGCG	TGCTGATGGGAATTACCAGG	chr13	32889169	32889192	chr13	32890222	32890245
pgrna177	C1R	Essential	GGTGCCGGCCCTGTTCTGCA	TGAGGACTGAACCTAACGGA	chr12	7244235	7244258	chr12	7246408	7246431
pgrna178	C1R	Essential	TGAGGACTGAACCTAACGGA	TACAGATCCCAGATCCCAGA	chr12	7246408	7246431	chr12	7243983	7244006
pgrna179	C1R	Essential	GCTCCCTGCCAAGAGCCCAG	TGAGGACTGAACCTAACGGA	chr12	7244740	7244763	chr12	7246408	7246431
pgrna180	C1R	Essential	TGAGGACTGAACCTAACGGA	CGTGGGGACTGTGATCACAG	chr12	7246408	7246431	chr12	7244122	7244145
pgrna181	CLEC2B	Essential	AAAAGGCATGACCTCGACAA	CGTTAAGTACTCCTAAAGCC	chr12	10024041	10024064	chr12	10021377	10021400
pgrna182	CLEC2B	Essential	TTCCCAACATGAATATTGGA	CGTTAAGTACTCCTAAAGCC	chr12	10023550	10023573	chr12	10021377	10021400
pgrna183	CLEC2B	Essential	AAAAGGCATGACCTCGACAA	CGGGCTTTAGGAGTACTTAA	chr12	10024041	10024064	chr12	10021376	10021399
pgrna184	CLEC2B	Essential	AAAAGGCATGACCTCGACAA	ACAGCACAGCTCCAAACTAG	chr12	10024041	10024064	chr12	10021924	10021947
pgrna185	CLEC2B	Essential	TTATGACCAATAACTAAGAA	CGTTAAGTACTCCTAAAGCC	chr12	10024123	10024146	chr12	10021377	10021400
pgrna186	CLSTN3	Essential	CAGTTGAGCACACTACCTGA	CCAAGGAGCGGGGTACAGCA	chr12	7281972	7281995	chr12	7283127	7283150
pgrna187	CLSTN3	Essential	CAGTTGAGCACACTACCTGA	CAGTGAAAGGGAGAGCCGCG	chr12	7281972	7281995	chr12	7283664	7283687
pgrna188	CLSTN3	Essential	CAGTTGAGCACACTACCTGA	TTTTACTTCACCCTTCCCAG	chr12	7281972	7281995	chr12	7282559	7282582
pgrna189	CLSTN3	Essential	GACCAGCAAGAGAAACGCAT	CAGTTGAGCACACTACCTGA	chr12	7283516	7283539	chr12	7281972	7281995
pgrna190	CLSTN3	Essential	GAGCAGGTCTGAGAACGGAT	CAGTTGAGCACACTACCTGA	chr12	7283439	7283462	chr12	7281972	7281995
pgrna191	DAG1	Essential	GGGCCTCTAAGACTAATCAA	ACAGCCCCTAGCCAGTCTAG	chr3	49507305	49507328	chr3	49504947	49504970
pgrna192	DAG1	Essential	GGGCCTCTAAGACTAATCAA	AGGTGGTTAGGCCTCCTAAG	chr3	49507305	49507328	chr3	49505041	49505064
pgrna193	DAG1	Essential	GAGTGGCCTAGGCTCTGCTG	GGGCCTCTAAGACTAATCAA	chr3	49504807	49504830	chr3	49507305	49507328
pgrna194	DAG1	Essential	GTATGGACTCCAGTGGGGGC	GGGCCTCTAAGACTAATCAA	chr3	49505003	49505026	chr3	49507305	49507328
pgrna195	DAG1	Essential	GGGCCTCTAAGACTAATCAA	CTACTCTAGAGTTCAGCACA	chr3	49507305	49507328	chr3	49504853	49504876
pgrna196	EPHA2	Essential	AAACCTATCAACCCATGCCA	CCGCCTGGACTGCAACCGCG	chr1	16483348	16483371	chr1	16482064	16482087
pgrna197	EPHA2	Essential	AAACCTATCAACCCATGCCA	AAGTCAAGCGTTCTGAGCAA	chr1	16483348	16483371	chr1	16481671	16481694
pgrna198	EPHA2	Essential	GCAGAAACAACATGCCCAAA	CCGCCTGGACTGCAACCGCG	chr1	16483220	16483243	chr1	16482064	16482087
pgrna199	EPHA2	Essential	GCAGAAACAACATGCCCAAA	AAGTCAAGCGTTCTGAGCAA	chr1	16483220	16483243	chr1	16481671	16481694
pgrna200	ERCC1	Essential	GCTCAGCTCTCCTTATGAGA	TGGATCATGCTACCACCACA	chr19	45981301	45981324	chr19	45983017	45983040
pgrna201	ERCC1	Essential	GCTCAGCTCTCCTTATGAGA	CTAAATCCAATAATATCCAA	chr19	45981301	45981324	chr19	45982969	45982992
pgrna202	ERCC1	Essential	GCTCAGCTCTCCTTATGAGA	AATAAACGTTTGAATGAACG	chr19	45981301	45981324	chr19	45982444	45982467
pgrna203	ERCC1	Essential	GTTCTTTTATGGAATTGCGT	GCTCAGCTCTCCTTATGAGA	chr19	45982410	45982433	chr19	45981301	45981324
pgrna204	ERCC1	Essential	TGGATCATGCTACCACCACA	AAGGGGATAACGGCTGCAAA	chr19	45983017	45983040	chr19	45981339	45981362
pgrna205	ETV6	Essential	GGATACATCGATGTGCACAA	GTTTCCACCACGTAGAAGGA	chr12	11802226	11802249	chr12	11803108	11803131
pgrna206	ETV6	Essential	GGATACATCGATGTGCACAA	TTTAAGCGCACTAATTACGG	chr12	11802226	11802249	chr12	11803395	11803418
pgrna207	ETV6	Essential	GGATACATCGATGTGCACAA	TTTTAAGCGCACTAATTACG	chr12	11802226	11802249	chr12	11803396	11803419
pgrna208	ETV6	Essential	GGATACATCGATGTGCACAA	AATATAACTTTTGTTCCCGA	chr12	11802226	11802249	chr12	11803484	11803507
pgrna209	FAM188A	Essential	AGAAGCGCCCTACAAAGGCA	AAATGGTGTCCGAGAGACCG	chr10	15902870	15902893	chr10	15902222	15902245
pgrna210	FAM188A	Essential	AGAAGCGCCCTACAAAGGCA	TGAGAAGGAGGGACGTCCAA	chr10	15902870	15902893	chr10	15901775	15901798
pgrna211	FAM188A	Essential	AGAAGCGCCCTACAAAGGCA	TGTTCCCGAAATAGATTGGG	chr10	15902870	15902893	chr10	15901270	15901293
pgrna212	FAM188A	Essential	AGAAGCGCCCTACAAAGGCA	TTAGGGGGTAAAGATGCGGA	chr10	15902870	15902893	chr10	15901835	15901858
pgrna213	FAM188A	Essential	GGTTACAAGCATACCGGCCG	AGAAGCGCCCTACAAAGGCA	chr10	15901566	15901589	chr10	15902870	15902893
pgrna214	IK	Essential	TTGCCATGCCAGTCTTAGAG	TTGAGCCCGGAGAAGCCACA	chr5	140026245	140026268	chr5	140027649	140027672
pgrna215	IK	Essential	GTAGCTTCTGAGCTTAAGCC	TTGCCATGCCAGTCTTAGAG	chr5	140027570	140027593	chr5	140026245	140026268
pgrna216	IK	Essential	TTGCCATGCCAGTCTTAGAG	AGTATTGTAGGACCGCTGCG	chr5	140026245	140026268	chr5	140027301	140027324
pgrna217	IK	Essential	TTGCCATGCCAGTCTTAGAG	CTACTCCAAGTGATGATGGG	chr5	140026245	140026268	chr5	140027719	140027742
pgrna218	IK	Essential	TTGCCATGCCAGTCTTAGAG	CTTCATTGAGAAACGCTACG	chr5	140026245	140026268	chr5	140026921	140026944
pgrna219	ING5	Essential	GCCGGCCTCTTGTGTGACCG	TTTCGGCCAAGGCATCCAGA	chr2	242641986	242642009	chr2	242640758	242640781
pgrna220	ING5	Essential	GCAGACGCGAAAGCAGCACG	TTTCGGCCAAGGCATCCAGA	chr2	242642845	242642868	chr2	242640758	242640781
pgrna221	ING5	Essential	TTTCGGCCAAGGCATCCAGA	CAGCAGGTCGGCGCCCCCAG	chr2	242640758	242640781	chr2	242642127	242642150
pgrna222	ING5	Essential	TTTCGGCCAAGGCATCCAGA	TTCCCTCACTTTACACACCA	chr2	242640758	242640781	chr2	242642166	242642189
pgrna223	KEAP1	Essential	GGACTTTTATTGTGACACGG	TATCATTAAGACTAAATGCG	chr19	10613490	10613513	chr19	10615170	10615193
pgrna224	KEAP1	Essential	TATCATTAAGACTAAATGCG	ACTTCCCCCACCCTACAAAG	chr19	10615170	10615193	chr19	10612971	10612994
pgrna225	KEAP1	Essential	GGACGCCCGAAAAGGAGGCG	TATCATTAAGACTAAATGCG	chr19	10614018	10614041	chr19	10615170	10615193
pgrna226	KEAP1	Essential	GGTTGGCAGCCGAGAGGCCG	TATCATTAAGACTAAATGCG	chr19	10613062	10613085	chr19	10615170	10615193
pgrna227	KEAP1	Essential	GCGAGGAAGTGACCCCACCG	TATCATTAAGACTAAATGCG	chr19	10613045	10613068	chr19	10615170	10615193
pgrna228	LCP1	Essential	GTTTCTCTGGAGATTTGAGG	TCGTGTGGAACATATGACCA	chr13	46785398	46785421	chr13	46786332	46786355
pgrna229	LCP1	Essential	TCGTGTGGAACATATGACCA	TATGAGACTAAAACCTAGGG	chr13	46786332	46786355	chr13	46784601	46784624
pgrna230	LCP1	Essential	GAGCACTGCAAAATTAGCCC	TCGTGTGGAACATATGACCA	chr13	46785685	46785708	chr13	46786332	46786355
pgrna231	LCP1	Essential	GTTCATCAACACCATGACAG	TCGTGTGGAACATATGACCA	chr13	46785470	46785493	chr13	46786332	46786355
pgrna232	LCP1	Essential	TCGTGTGGAACATATGACCA	CCAACGATCTTGAAGAGCAT	chr13	46786332	46786355	chr13	46784799	46784822
pgrna233	MSMO1	Essential	GTAAAGGCATCCTAAAGACA	CGTGTGCATCAATCACAGCG	chr4	166247458	166247481	chr4	166249506	166249529
pgrna234	MSMO1	Essential	GTAAAGGCATCCTAAAGACA	TATCCAGTCAGAGAGTTCAG	chr4	166247458	166247481	chr4	166250132	166250155
pgrna235	MSMO1	Essential	GTAAAGGCATCCTAAAGACA	TTAGAAATAAGGTTTAGGAA	chr4	166247458	166247481	chr4	166249628	166249651
pgrna236	MSMO1	Essential	GTAAAGGCATCCTAAAGACA	GTAAGGGAACGATATTTCCG	chr4	166247458	166247481	chr4	166249372	166249395
pgrna237	MSMO1	Essential	GCTGGACGATGAGTGCCCGG	CGTGTGCATCAATCACAGCG	chr4	166248058	166248081	chr4	166249506	166249529
pgrna238	NF1	Essential	GCGCGGCCATGTCCTCCCCG	CTAGCCTTTCTCCCAGCGCG	chr17	29422314	29422337	chr17	29421605	29421628
pgrna239	NF1	Essential	GGGTAATTATTAAATCCAGA	CTAGCCTTTCTCCCAGCGCG	chr17	29422720	29422743	chr17	29421605	29421628
pgrna240	NF1	Essential	GCGCGGCCATGTCCTCCCCG	ACGAAGAACCTGAAAATCGG	chr17	29422314	29422337	chr17	29421512	29421535
pgrna241	NF1	Essential	GCGCGGCCATGTCCTCCCCG	AGTCAGGATGTAAACCAACG	chr17	29422314	29422337	chr17	29421057	29421080
pgrna242	NF1	Essential	GCTAGACCTTGATTGCCACC	GCGCGGCCATGTCCTCCCCG	chr17	29421396	29421419	chr17	29422314	29422337
pgrna243	PLXNB2	Essential	GATTGTGGTTCAAGGCCCAA	GGATTTGCCCGAGCTCCCGG	chr22	50747338	50747361	chr22	50745573	50745596
pgrna244	PLXNB2	Essential	GATTGTGGTTCAAGGCCCAA	ACGCCACTCTGGGAACCGCG	chr22	50747338	50747361	chr22	50745462	50745485
pgrna245	PLXNB2	Essential	GATTGTGGTTCAAGGCCCAA	GCTTCGGGAAGAGAAATCAA	chr22	50747338	50747361	chr22	50745226	50745249
pgrna246	PLXNB2	Essential	GAGTTTGTCAGGATGTGGCG	GGATTTGCCCGAGCTCCCGG	chr22	50747236	50747259	chr22	50745573	50745596
pgrna247	PLXNB2	Essential	GGATTTGCCCGAGCTCCCGG	TCAGCACATCCAGTTCCGGG	chr22	50745573	50745596	chr22	50747051	50747074
pgrna248	PPAP2C	Essential	CAGAGGCTGGAGGTTCCCCG	CGTCCTGCCGGGGTAACCCG	chr19	291832	291855	chr19	290896	290919
pgrna249	PPAP2C	Essential	GTCAGGGCCGGGACTCCGGG	CGTCCTGCCGGGGTAACCCG	chr19	291773	291796	chr19	290896	290919
pgrna250	PPAP2C	Essential	CAGAGGCTGGAGGTTCCCCG	TGACAGCAAGAAGTCCCTGT	chr19	291832	291855	chr19	290416	290439
pgrna251	PPAP2C	Essential	AAGTCGGGAACCGTCCCGCG	CGTCCTGCCGGGGTAACCCG	chr19	291917	291940	chr19	290896	290919
pgrna252	PPAP2C	Essential	CAGAGGCTGGAGGTTCCCCG	TGTGGGTGTCTGCCAGCCCG	chr19	291832	291855	chr19	290399	290422
pgrna253	PPIL2	Essential	GGACCGATAATAAAGCAGGA	ATCATTGCACTGCTTCCCAG	chr22	22005664	22005687	chr22	22007631	22007654
pgrna254	PPIL2	Essential	CACAGATCCAAAAGACCACG	ATCATTGCACTGCTTCCCAG	chr22	22005869	22005892	chr22	22007631	22007654
pgrna255	PPIL2	Essential	GTCCAAATATCCCATCCAGG	ATCATTGCACTGCTTCCCAG	chr22	22006019	22006042	chr22	22007631	22007654
pgrna256	PPIL2	Essential	ATGCATAACAAAGCAGCCCG	ATCATTGCACTGCTTCCCAG	chr22	22006061	22006084	chr22	22007631	22007654
pgrna257	PPIL2	Essential	GGACCGATAATAAAGCAGGA	CGGCCTATAGTAGTGCAACA	chr22	22005664	22005687	chr22	22007611	22007634
pgrna258	PRDM1	Essential	TTGCAGCTAGTGTAATACAG	TGGTCCAAGTGATTTCTAAG	chr6	106533784	106533807	chr6	106535400	106535423
pgrna259	PRDM1	Essential	TTGCAGCTAGTGTAATACAG	ATTTGCTTGGAAAAACGTGT	chr6	106533784	106533807	chr6	106534437	106534460
pgrna260	PRDM1	Essential	GGATGTCCTTCCTTCAACAG	TGGTCCAAGTGATTTCTAAG	chr6	106533396	106533419	chr6	106535400	106535423
pgrna261	PRDM1	Essential	GGATGTCCTTCCTTCAACAG	ATTTGCTTGGAAAAACGTGT	chr6	106533396	106533419	chr6	106534437	106534460
pgrna262	PRDM1	Essential	TTGCAGCTAGTGTAATACAG	CTGCCAGCATCACTGAGCTA	chr6	106533784	106533807	chr6	106535423	106535446
pgrna263	PTCH1	Essential	GTACAAATCTTGGTTTCCAA	GCTTTCGGCGGAGTGCAGCG	chr9	98279782	98279805	chr9	98279040	98279063
pgrna264	PTCH1	Essential	GCTTTCGGCGGAGTGCAGCG	ATATGACACCAAAAGACAGG	chr9	98279040	98279063	chr9	98280594	98280617
pgrna265	PTCH1	Essential	GCTTTCGGCGGAGTGCAGCG	AGATGTGTGCGGATTCGTGT	chr9	98279040	98279063	chr9	98279717	98279740
pgrna266	PTCH1	Essential	GCTTTCGGCGGAGTGCAGCG	AACACCGTCTACCAGCGGCG	chr9	98279040	98279063	chr9	98280042	98280065
pgrna267	PTCH1	Essential	GCTTTCGGCGGAGTGCAGCG	CTCGCATTCCCACGGAAGCG	chr9	98279040	98279063	chr9	98279590	98279613
pgrna268	RB1	Essential	TGTCCAATACCAGGGCCGAT	TCAACTTGACAGGTGTCGGG	chr13	48876860	48876883	chr13	48878389	48878412
pgrna269	RB1	Essential	GGAGAATTGGAGTACTCCGG	TGTCCAATACCAGGGCCGAT	chr13	48878555	48878578	chr13	48876860	48876883
pgrna270	RB1	Essential	TGTAAGAACGGGAAGCACCG	TCAACTTGACAGGTGTCGGG	chr13	48877266	48877289	chr13	48878389	48878412
pgrna271	RB1	Essential	GGAGAATTGGAGTACTCCGG	TGTAAGAACGGGAAGCACCG	chr13	48878555	48878578	chr13	48877266	48877289
pgrna272	RB1	Essential	TGTCCAATACCAGGGCCGAT	TCCTGAGCCGAGTATCCTGT	chr13	48876860	48876883	chr13	48878722	48878745
pgrna273	RBM5	Essential	GATGTCTTATTACCAACGGG	CAGTTTCTCGCATTGTCCCC	chr3	50127171	50127194	chr3	50125757	50125780
pgrna274	RBM5	Essential	CAGTTTCTCGCATTGTCCCC	ATTCAGTTGCAGTTGAGCGG	chr3	50125757	50125780	chr3	50126802	50126825
pgrna275	RBM5	Essential	CAGTTTCTCGCATTGTCCCC	TTTAACGGTCAACTATCCCA	chr3	50125757	50125780	chr3	50127439	50127462
pgrna276	RBM5	Essential	GCTTGGATACTACTGAGGCT	CAGTTTCTCGCATTGTCCCC	chr3	50127728	50127751	chr3	50125757	50125780
pgrna277	RBM5	Essential	GCCCTCTCCGAAAAGCTGTT	CAGTTTCTCGCATTGTCCCC	chr3	50126826	50126849	chr3	50125757	50125780
pgrna278	RRM2B	Essential	GTAGGAAATGTTATTCGCCG	TGTTGCTGTGGGAAGCGCCG	chr8	103250957	103250980	chr8	103251985	103252008
pgrna279	RRM2B	Essential	GAGCTATCCCAGAGTCCGCG	GTAGGAAATGTTATTCGCCG	chr8	103251763	103251786	chr8	103250957	103250980
pgrna280	RRM2B	Essential	GTAGGAAATGTTATTCGCCG	TCAAACCTGCCATAGCGTAG	chr8	103250957	103250980	chr8	103252375	103252398
pgrna281	RRM2B	Essential	GTAGGAAATGTTATTCGCCG	TTCCCTAGCGAAGTGTTTGG	chr8	103250957	103250980	chr8	103252022	103252045
pgrna282	RRM2B	Essential	GTAGGAAATGTTATTCGCCG	CGTGTTCCTGGAACACCACG	chr8	103250957	103250980	chr8	103251905	103251928
pgrna283	SERPINB8	Essential	GTTTACAACCAAACTCCCAG	ATCAGCATCCCGATTCCGAG	chr18	61635774	61635797	chr18	61638534	61638557
pgrna284	SERPINB8	Essential	GTTCAAATAATGTCTCCTGC	ATCAGCATCCCGATTCCGAG	chr18	61636306	61636329	chr18	61638534	61638557
pgrna285	SERPINB8	Essential	GTAAAGGACTTCAAACCACC	ATCAGCATCCCGATTCCGAG	chr18	61635813	61635836	chr18	61638534	61638557
pgrna286	SERPINB8	Essential	CATGGATCAGAACTGTAGGT	ATCAGCATCCCGATTCCGAG	chr18	61636584	61636607	chr18	61638534	61638557
pgrna287	SERPINB8	Essential	GTTTACAACCAAACTCCCAG	CCAATAGGCTGTAAGCACAG	chr18	61635774	61635797	chr18	61637970	61637993
pgrna288	SLC24A1	Essential	GCGAAATCGTGCAGTTTACG	ACTGAGCCAGAATTACCACG	chr15	65903210	65903233	chr15	65905089	65905112
pgrna289	SLC24A1	Essential	GTTGTTTGAACAGTACACGT	ACTGAGCCAGAATTACCACG	chr15	65902808	65902831	chr15	65905089	65905112
pgrna290	SLC24A1	Essential	GCGAAATCGTGCAGTTTACG	TTTGAACCGTAACTACCCAG	chr15	65903210	65903233	chr15	65904576	65904599
pgrna291	SLC24A1	Essential	TATGGGTGAAGAACAACCCA	ACTGAGCCAGAATTACCACG	chr15	65903346	65903369	chr15	65905089	65905112
pgrna292	SLC24A1	Essential	ACTCAGGTTGGAGTAAAGGA	ACTGAGCCAGAATTACCACG	chr15	65902341	65902364	chr15	65905089	65905112
pgrna293	SMAD4	Essential	CGTGGCGATTACAGACCACA	TCTTAGAGCTGAAAGAACCG	chr18	48493846	48493869	chr18	48494786	48494809
pgrna294	SMAD4	Essential	CGTGGCGATTACAGACCACA	TCTGCCCTAGGCACACCACA	chr18	48493846	48493869	chr18	48494824	48494847
pgrna295	SMAD4	Essential	GACGTGGGATTGAAAAACCC	TCTTAGAGCTGAAAGAACCG	chr18	48493891	48493914	chr18	48494786	48494809
pgrna296	SMAD4	Essential	GACGTGGGATTGAAAAACCC	TCTGCCCTAGGCACACCACA	chr18	48493891	48493914	chr18	48494824	48494847
pgrna297	SMAD4	Essential	CGTGGCGATTACAGACCACA	CTGATGCCCCATCATCACCG	chr18	48493846	48493869	chr18	48494939	48494962
pgrna298	SNAPC5	Essential	GGACTTGGTCAGAAACGCAG	GCGTCAGTAACAAGAGCCAC	chr15	66791428	66791451	chr15	66789443	66789466
pgrna299	SNAPC5	Essential	GGACTTGGTCAGAAACGCAG	GGTCTAGGCGAGCCTTCGGG	chr15	66791428	66791451	chr15	66789632	66789655
pgrna300	SNAPC5	Essential	GGAGGGTTAACAGATCACCT	GCGTCAGTAACAAGAGCCAC	chr15	66790677	66790700	chr15	66789443	66789466
pgrna301	SNAPC5	Essential	GGAGGGTTAACAGATCACCT	GGTCTAGGCGAGCCTTCGGG	chr15	66790677	66790700	chr15	66789632	66789655
pgrna302	SNAPC5	Essential	GTTAACCCTCCCCATTTCCA	GCGTCAGTAACAAGAGCCAC	chr15	66790665	66790688	chr15	66789443	66789466
pgrna303	SRGAP2	Essential	GTAGGAGTCTGACTGGAGCA	ACATGGCATATCATATACAA	chr1	206514634	206514657	chr1	206517218	206517241
pgrna304	SRGAP2	Essential	TGGCCTTTAGTGCTGAATGG	ACATGGCATATCATATACAA	chr1	206514564	206514587	chr1	206517218	206517241
pgrna305	SRGAP2	Essential	GTAGGAGTCTGACTGGAGCA	ACTGGCTTTTATTAGTAGCC	chr1	206514634	206514657	chr1	206517667	206517690
pgrna306	SRGAP2	Essential	GTAGGAGTCTGACTGGAGCA	GTGAAGCTGTTGAGCTTAAG	chr1	206514634	206514657	chr1	206516799	206516822
pgrna307	SRGAP2	Essential	GTAGGAGTCTGACTGGAGCA	AAAAGCCAGTGAGCTCTGGG	chr1	206514634	206514657	chr1	206517654	206517677
pgrna308	STK11	Essential	ATGCCTCTGTCCATAGAGGA	ATGACCTGAATGAGTGAACG	chr19	1187662	1187685	chr19	1189768	1189791
pgrna309	STK11	Essential	ATGCCTCTGTCCATAGAGGA	CCTGCAGACAGGGTTGACGG	chr19	1187662	1187685	chr19	1189673	1189696
pgrna310	STK11	Essential	GCAGCACCAGTAGACATCAG	ATGACCTGAATGAGTGAACG	chr19	1187771	1187794	chr19	1189768	1189791
pgrna311	STK11	Essential	GCAGCACCAGTAGACATCAG	CCTGCAGACAGGGTTGACGG	chr19	1187771	1187794	chr19	1189673	1189696
pgrna312	STK11	Essential	ATGCCTCTGTCCATAGAGGA	CTTGAAGGAGACAATTATGT	chr19	1187662	1187685	chr19	1190104	1190127
pgrna313	UCK1	Essential	ACTGGCGCAGAGGCAGCGCG	CCTGAGATGCCGGAACACAG	chr9	134406915	134406938	chr9	134405212	134405235
pgrna314	UCK1	Essential	ACAAAACAGACAACCCCGGG	CCTGAGATGCCGGAACACAG	chr9	134407568	134407591	chr9	134405212	134405235
pgrna315	UCK1	Essential	ACTGGCGCAGAGGCAGCGCG	CGTGCCTGTCACAGGACGAG	chr9	134406915	134406938	chr9	134406065	134406088
pgrna316	UCK1	Essential	ACAAAACAGACAACCCCGGG	CGTGCCTGTCACAGGACGAG	chr9	134407568	134407591	chr9	134406065	134406088
pgrna317	UCK1	Essential	GGGACTAACTGGTTAGACTG	ACTGGCGCAGAGGCAGCGCG	chr9	134405295	134405318	chr9	134406915	134406938
pgrna318	USP24	Essential	AGAGGGAATTCCCTGCGCCG	AATGAGAGAAAATTAGACCG	chr1	55681477	55681500	chr1	55679621	55679644
pgrna319	USP24	Essential	ACGATGTTCGAACGAGTCCG	AATGAGAGAAAATTAGACCG	chr1	55681904	55681927	chr1	55679621	55679644
pgrna320	USP24	Essential	GTTTAGGGTGATTTCGGCAA	AATGAGAGAAAATTAGACCG	chr1	55681682	55681705	chr1	55679621	55679644
pgrna321	USP24	Essential	TTCACCTTAGGCACGCTCCG	AATGAGAGAAAATTAGACCG	chr1	55681187	55681210	chr1	55679621	55679644
pgrna322	USP24	Essential	GGTGTGAGCAAGGAACGTGG	AGAGGGAATTCCCTGCGCCG	chr1	55679449	55679472	chr1	55681477	55681500
pgrna323	XPA	Essential	GCAGGTAACTGCTTTATACG	GGTGCAGCGAAGAAGGCCCG	chr9	100460610	100460633	chr9	100459148	100459171
pgrna324	XPA	Essential	GCAGGTAACTGCTTTATACG	TCTACGACATGGCTGTGGAA	chr9	100460610	100460633	chr9	100458223	100458246
pgrna325	XPA	Essential	GCAGGTAACTGCTTTATACG	TCTAAACTGTGCTCGACAAA	chr9	100460610	100460633	chr9	100458496	100458519
pgrna326	XPA	Essential	GCAGGTAACTGCTTTATACG	GGGCCTTCTTCGCTGCACCT	chr9	100460610	100460633	chr9	100459144	100459167
pgrna327	XPA	Essential	GCTACTGCCAGGTAGACAGT	GGTGCAGCGAAGAAGGCCCG	chr9	100460304	100460327	chr9	100459148	100459171
pgrna328	H19	Essential	GAAGACCTCCGAGAACCCTG	GAGCCTGCCCTGCTACCACG	chr11	2023338	2023361	chr11	2022406	2022429
pgrna329	H19	Essential	GGGCGCCACAGGGTTCACAG	AATTTGCTGTGCTCATCACG	chr11	2021504	2021527	chr11	2023191	2023214
pgrna330	H19	Essential	GAGCCTGCCCTGCTACCACG	AATTTGCTGTGCTCATCACG	chr11	2022406	2022429	chr11	2023191	2023214
pgrna331	H19	Essential	GAAGACCTCCGAGAACCCTG	GGCACCGCATTGGTTCGCGA	chr11	2023338	2023361	chr11	2022317	2022340
pgrna332	H19	Essential	GGCACCGCATTGGTTCGCGA	AATTTGCTGTGCTCATCACG	chr11	2022317	2022340	chr11	2023191	2023214
pgrna333	H19	Essential	GAAGACCTCCGAGAACCCTG	AGTGTGAAACCCTTCTCGCA	chr11	2023338	2023361	chr11	2021332	2021355
pgrna334	H19	Essential	GAAGACCTCCGAGAACCCTG	GGGCGCCACAGGGTTCACAG	chr11	2023338	2023361	chr11	2021504	2021527
pgrna335	H19	Essential	GAAGACCTCCGAGAACCCTG	CATCCAAGCCGGGCGCCACA	chr11	2023338	2023361	chr11	2021514	2021537
pgrna336	H19	Essential	GAGCCTGCCCTGCTACCACG	TATGGCCCGATACGAAGACG	chr11	2022406	2022429	chr11	2023287	2023310
pgrna337	H19	Essential	AATTTGCTGTGCTCATCACG	AGTGTGAAACCCTTCTCGCA	chr11	2023191	2023214	chr11	2021332	2021355
pgrna338	PTEN	Essential	GCAAACGAGCCGAGTTACCG	GGGCGCCTCGGAAGACCGAG	chr10	89622520	89622543	chr10	89623244	89623267
pgrna339	PTEN	Essential	CCTCAAGCACAGAACCAAAA	AGCGCCTGTGAGCAGCCGCG	chr10	89621561	89621584	chr10	89623503	89623526
pgrna340	PTEN	Essential	GCAAACGAGCCGAGTTACCG	AGCGCCTGTGAGCAGCCGCG	chr10	89622520	89622543	chr10	89623503	89623526
pgrna341	PTEN	Essential	GCCGATTCTTACAGAACGCG	GGGCGCCTCGGAAGACCGAG	chr10	89621769	89621792	chr10	89623244	89623267
pgrna342	PTEN	Essential	GCCGATTCTTACAGAACGCG	AGCGCCTGTGAGCAGCCGCG	chr10	89621769	89621792	chr10	89623503	89623526
pgrna343	PTEN	Essential	GGGCGCCTCGGAAGACCGAG	CCGCGTTCTGTAAGAATCGG	chr10	89623244	89623267	chr10	89621771	89621794
pgrna344	PTEN	Essential	CCGCGTTCTGTAAGAATCGG	AGCGCCTGTGAGCAGCCGCG	chr10	89621771	89621794	chr10	89623503	89623526
pgrna345	PTEN	Essential	GCAAACGAGCCGAGTTACCG	GCGGGACTCTTTATGCGCTG	chr10	89622520	89622543	chr10	89623320	89623343
pgrna346	PTEN	Essential	GCAAACGAGCCGAGTTACCG	TCAGCGCCTGTGAGCAGCCG	chr10	89622520	89622543	chr10	89623501	89623524
pgrna347	PTEN	Essential	GGGCGCCTCGGAAGACCGAG	CCTCAAGCACAGAACCAAAA	chr10	89623244	89623267	chr10	89621561	89621584
pgrna348	unknown1045	Neutral	GGTTTCCTCTTGAGAGTCTA	TGAGTCCTAGATGTCCTCCA	chr18	55566153	55566176	chr18	55568218	55568241
pgrna349	unknown1045	Neutral	GGTTTCCTCTTGAGAGTCTA	CAGGGACTCTGTGTAGTGGA	chr18	55566153	55566176	chr18	55568200	55568223
pgrna350	unknown1045	Neutral	GATACTAAGATAATGCAGAA	TGAGTCCTAGATGTCCTCCA	chr18	55566278	55566301	chr18	55568218	55568241
pgrna351	unknown1045	Neutral	CTACCCAAATTCGAATTAAA	GATGTGTCATTTTATGGTAA	chr18	55566504	55566527	chr18	55568247	55568270
pgrna352	unknown1045	Neutral	TTCTTAGTACAGCAAACGCC	GATGTGTCATTTTATGGTAA	chr18	55566527	55566550	chr18	55568247	55568270
pgrna353	unknown1045	Neutral	TGAAACCCTTCTTTCCCAAG	GATGTGTCATTTTATGGTAA	chr18	55566609	55566632	chr18	55568247	55568270
pgrna354	unknown1045	Neutral	GGTTTCCTCTTGAGAGTCTA	GATGTGTCATTTTATGGTAA	chr18	55566153	55566176	chr18	55568247	55568270
pgrna355	unknown1045	Neutral	GATACTAAGATAATGCAGAA	GATGTGTCATTTTATGGTAA	chr18	55566278	55566301	chr18	55568247	55568270
pgrna356	unknown1045	Neutral	GGTTTCCTCTTGAGAGTCTA	CCACTACACAGAGTCCCTGG	chr18	55566153	55566176	chr18	55568204	55568227
pgrna357	unknown1045	Neutral	GATACTAAGATAATGCAGAA	CCACTACACAGAGTCCCTGG	chr18	55566278	55566301	chr18	55568204	55568227
pgrna358	unknown1065	Neutral	CAGAAGGCGATGCCTCCAAG	GATTCTCAGATCTTTAGCTA	chr18	68238198	68238221	chr18	68239837	68239860
pgrna359	unknown1065	Neutral	GAAGAGCCCAGAGAGTCTGC	GATTCTCAGATCTTTAGCTA	chr18	68238084	68238107	chr18	68239837	68239860
pgrna360	unknown1065	Neutral	CAGAAGGCGATGCCTCCAAG	GGGGGGATTCACCACAGCAA	chr18	68238198	68238221	chr18	68239784	68239807
pgrna361	unknown1065	Neutral	GAAGAGCCCAGAGAGTCTGC	CATGGGATATAACAATGCAG	chr18	68238084	68238107	chr18	68239811	68239834
pgrna362	unknown1065	Neutral	CAGAAGGCGATGCCTCCAAG	GGATTCACCACAGCAACGGT	chr18	68238198	68238221	chr18	68239780	68239803
pgrna363	unknown1065	Neutral	CAGAAGGCGATGCCTCCAAG	GATTCACCACAGCAACGGTA	chr18	68238198	68238221	chr18	68239779	68239802
pgrna364	unknown1065	Neutral	GAAGAGCCCAGAGAGTCTGC	AGAATGGCCCAAAAGTTGGG	chr18	68238084	68238107	chr18	68239932	68239955
pgrna365	unknown1065	Neutral	CAGAAGGCGATGCCTCCAAG	GCACTGACAACCTGACAGAG	chr18	68238198	68238221	chr18	68239753	68239776
pgrna366	unknown1065	Neutral	GAAGAGCCCAGAGAGTCTGC	ATATGCAATCTGGCGCTCAG	chr18	68238084	68238107	chr18	68240137	68240160
pgrna367	unknown1065	Neutral	GAAGAGCCCAGAGAGTCTGC	AAGATCTGAGAATCTAGCAT	chr18	68238084	68238107	chr18	68239828	68239851
pgrna368	unknown1066	Neutral	GGTGTTGTTGGAGGGAGTGA	ACAGGTGCCCTAAACCAGAA	chr18	68492066	68492089	chr18	68494039	68494062
pgrna369	unknown1066	Neutral	GAGGGAACCTTTAAAAGGGT	TGAGGACCAAGAATTGCTGA	chr18	68492048	68492071	chr18	68493999	68494022
pgrna370	unknown1066	Neutral	GAGTGAGGGAACCTTTAAAA	ACAGGTGCCCTAAACCAGAA	chr18	68492052	68492075	chr18	68494039	68494062
pgrna371	unknown1066	Neutral	GAGGGAACCTTTAAAAGGGT	ACAGGTGCCCTAAACCAGAA	chr18	68492048	68492071	chr18	68494039	68494062
pgrna372	unknown1066	Neutral	GGTGTTGTTGGAGGGAGTGA	TATTAGCTGTCTGCTGTACA	chr18	68492066	68492089	chr18	68493701	68493724
pgrna373	unknown1066	Neutral	GGTGTTGTTGGAGGGAGTGA	TGAGGACCAAGAATTGCTGA	chr18	68492066	68492089	chr18	68493999	68494022
pgrna374	unknown1066	Neutral	GAGTGAGGGAACCTTTAAAA	TATTAGCTGTCTGCTGTACA	chr18	68492052	68492075	chr18	68493701	68493724
pgrna375	unknown1066	Neutral	GAGTGAGGGAACCTTTAAAA	TGAGGACCAAGAATTGCTGA	chr18	68492052	68492075	chr18	68493999	68494022
pgrna376	unknown1066	Neutral	GGTGTTGTTGGAGGGAGTGA	TTAGAAAACCCAAGAAGGAC	chr18	68492066	68492089	chr18	68494057	68494080
pgrna377	unknown1066	Neutral	GAGGGAACCTTTAAAAGGGT	TATTAGCTGTCTGCTGTACA	chr18	68492048	68492071	chr18	68493701	68493724
pgrna378	unknown1114	Neutral	AGAAATATTATACAGCTACG	GCTGAAGGTTTAGTAATAAA	chr2	6698756	6698779	chr2	6700952	6700975
pgrna379	unknown1114	Neutral	AGAAATATTATACAGCTACG	GGTTTAGTAATAAAGGGAGT	chr2	6698756	6698779	chr2	6700958	6700981
pgrna380	unknown1114	Neutral	AGAAATATTATACAGCTACG	GGGACCACATTGTACACGAA	chr2	6698756	6698779	chr2	6700870	6700893
pgrna381	unknown1114	Neutral	GGACTGAGTCTCTTTAAACA	GCTGAAGGTTTAGTAATAAA	chr2	6698724	6698747	chr2	6700952	6700975
pgrna382	unknown1114	Neutral	GGACTGAGTCTCTTTAAACA	GGGACCACATTGTACACGAA	chr2	6698724	6698747	chr2	6700870	6700893
pgrna383	unknown1114	Neutral	CTGCATGAAACTACTTCAAG	GCTGAAGGTTTAGTAATAAA	chr2	6698634	6698657	chr2	6700952	6700975
pgrna384	unknown1114	Neutral	CTGCATGAAACTACTTCAAG	GGGACCACATTGTACACGAA	chr2	6698634	6698657	chr2	6700870	6700893
pgrna385	unknown1114	Neutral	GGACTGAGTCTCTTTAAACA	TTATTGTGCAGTCACAAGGG	chr2	6698724	6698747	chr2	6700652	6700675
pgrna386	unknown1114	Neutral	AGCTACGCGGACTATACAAA	GCTGAAGGTTTAGTAATAAA	chr2	6698769	6698792	chr2	6700952	6700975
pgrna387	unknown1114	Neutral	AGCTACGCGGACTATACAAA	GGGACCACATTGTACACGAA	chr2	6698769	6698792	chr2	6700870	6700893
pgrna388	unknown1115	Neutral	TAGCAAGCTGAATTACAGGG	GCTTTGATGTGCCCCGTGCG	chr2	7340377	7340400	chr2	7342138	7342161
pgrna389	unknown1115	Neutral	GTTATGGGCCCCTTGATGAC	TTAATCCTTAGTATAACAAA	chr2	7340173	7340196	chr2	7342316	7342339
pgrna390	unknown1115	Neutral	TAGCAAGCTGAATTACAGGG	GTTATACTAAGGATTAAAAA	chr2	7340377	7340400	chr2	7342322	7342345
pgrna391	unknown1115	Neutral	TAGCAAGCTGAATTACAGGG	GTCTAGTTGTCATCCTCGCA	chr2	7340377	7340400	chr2	7342125	7342148
pgrna392	unknown1115	Neutral	TAGCAAGCTGAATTACAGGG	GCTGTTTAATTAAATTTACA	chr2	7340377	7340400	chr2	7342184	7342207
pgrna393	unknown1115	Neutral	GTTATGGGCCCCTTGATGAC	CTAGTTGTCATCCTCGCACG	chr2	7340173	7340196	chr2	7342127	7342150
pgrna394	unknown1115	Neutral	TAGCAAGCTGAATTACAGGG	GCAGTTGGGCAGCTATTGAT	chr2	7340377	7340400	chr2	7342294	7342317
pgrna395	unknown1115	Neutral	TTTAGCTAGCTGCTGGACGA	GCTTTGATGTGCCCCGTGCG	chr2	7340223	7340246	chr2	7342138	7342161
pgrna396	unknown1115	Neutral	TAGGACGTACATGGTCTGAT	GCTTTGATGTGCCCCGTGCG	chr2	7340594	7340617	chr2	7342138	7342161
pgrna397	unknown1115	Neutral	GTTATGGGCCCCTTGATGAC	GCTTTGATGTGCCCCGTGCG	chr2	7340173	7340196	chr2	7342138	7342161
pgrna398	unknown1118	Neutral	GAGCGGGTAGAGATGGAAAT	CCACTAGTAAGAATGGAGGG	chr2	8602861	8602884	chr2	8604685	8604708
pgrna399	unknown1118	Neutral	GTAGAGGAAAGGACAGAACG	CCACTAGTAAGAATGGAGGG	chr2	8602938	8602961	chr2	8604685	8604708
pgrna400	unknown1118	Neutral	GTAGAGGAAAGGACAGAACG	GGGGAGGTCAATCATTAGGG	chr2	8602938	8602961	chr2	8604524	8604547
pgrna401	unknown1118	Neutral	GTAGAGGAAAGGACAGAACG	CCCAGGAGAGATGGTTTAGT	chr2	8602938	8602961	chr2	8604483	8604506
pgrna402	unknown1118	Neutral	GCTGGTGAGACAGCAGGTAG	CCACTAGTAAGAATGGAGGG	chr2	8602922	8602945	chr2	8604685	8604708
pgrna403	unknown1118	Neutral	TTACTGCTGCAAAGACTGGA	GGGGAGGTCAATCATTAGGG	chr2	8602634	8602657	chr2	8604524	8604547
pgrna404	unknown1119	Neutral	GCCTCCATAGCTATGCACCT	GGGCCCTCACATCTATAGAG	chr2	10652453	10652476	chr2	10654456	10654479
pgrna405	unknown1119	Neutral	CTGTCCCTGGAAATATCCCT	GTGCCACTCTATAGATGTGA	chr2	10652501	10652524	chr2	10654453	10654476
pgrna406	unknown1119	Neutral	GCCTCCATAGCTATGCACCT	TTGACCATCTGAGACCAAGT	chr2	10652453	10652476	chr2	10654283	10654306
pgrna407	unknown1119	Neutral	CATTCCAAGGGATATTTCCA	GGGCCCTCACATCTATAGAG	chr2	10652505	10652528	chr2	10654456	10654479
pgrna408	unknown1119	Neutral	GCCTCCATAGCTATGCACCT	GAGAAGACCTATTTGTTCAG	chr2	10652453	10652476	chr2	10654357	10654380
pgrna409	unknown1119	Neutral	CTGTCCCTGGAAATATCCCT	GGGCCCTCACATCTATAGAG	chr2	10652501	10652524	chr2	10654456	10654479
pgrna410	unknown1119	Neutral	GCCTCCATAGCTATGCACCT	GTGCCACTCTATAGATGTGA	chr2	10652453	10652476	chr2	10654453	10654476
pgrna411	unknown1119	Neutral	CATTCCAAGGGATATTTCCA	GAGAAGACCTATTTGTTCAG	chr2	10652505	10652528	chr2	10654357	10654380
pgrna412	unknown1119	Neutral	CTGTCCCTGGAAATATCCCT	GAGAAGACCTATTTGTTCAG	chr2	10652501	10652524	chr2	10654357	10654380
pgrna413	unknown1119	Neutral	CATTCCAAGGGATATTTCCA	GTGCCACTCTATAGATGTGA	chr2	10652505	10652528	chr2	10654453	10654476
pgrna414	unknown114	Neutral	GGAGGGTCAGAACATTAAAT	GCTGTGTTGCACTATCCTAG	chr1	162893003	162893026	chr1	162894910	162894933
pgrna415	unknown114	Neutral	GGTGTTGCTTGCAGACATGA	CGAACAGTGACCTGAAAGCA	chr1	162893052	162893075	chr1	162894779	162894802
pgrna416	unknown114	Neutral	CTATGCACCATCTTAACAGA	GCTGTGTTGCACTATCCTAG	chr1	162893181	162893204	chr1	162894910	162894933
pgrna417	unknown114	Neutral	GGAGGGTCAGAACATTAAAT	CTATTCCTCAGAATTAAACA	chr1	162893003	162893026	chr1	162894854	162894877
pgrna418	unknown114	Neutral	GGTGTTGCTTGCAGACATGA	GCTGTGTTGCACTATCCTAG	chr1	162893052	162893075	chr1	162894910	162894933
pgrna419	unknown114	Neutral	ACAATACAGAGAGGTCACAG	GCTGTGTTGCACTATCCTAG	chr1	162893239	162893262	chr1	162894910	162894933
pgrna420	unknown114	Neutral	GGTGTTGCTTGCAGACATGA	CTATTCCTCAGAATTAAACA	chr1	162893052	162893075	chr1	162894854	162894877
pgrna421	unknown114	Neutral	CCTGCAGGTCTAGGGCACAC	GCTGTGTTGCACTATCCTAG	chr1	162893025	162893048	chr1	162894910	162894933
pgrna422	unknown114	Neutral	GGAGGGTCAGAACATTAAAT	CGAACAGTGACCTGAAAGCA	chr1	162893003	162893026	chr1	162894779	162894802
pgrna423	unknown114	Neutral	GGAGGGTCAGAACATTAAAT	GTCACTGTTCGACAGTAGCG	chr1	162893003	162893026	chr1	162894791	162894814
pgrna424	unknown119	Neutral	GAGGTGCAGCAAAAACACTG	GGTGAATCTCAGCAGAACAG	chr1	165105568	165105591	chr1	165107386	165107409
pgrna425	unknown119	Neutral	CTGCAGATAGCATCTGAATA	GAATGCCATGCATAGCACAG	chr1	165105536	165105559	chr1	165107434	165107457
pgrna426	unknown119	Neutral	CTGCAGATAGCATCTGAATA	GGTGAATCTCAGCAGAACAG	chr1	165105536	165105559	chr1	165107386	165107409
pgrna427	unknown119	Neutral	ATAGATTTCTCTGGACTTCA	GGTGAATCTCAGCAGAACAG	chr1	165105465	165105488	chr1	165107386	165107409
pgrna428	unknown119	Neutral	AATCTTCCCCCTTCCTATAG	GGTGAATCTCAGCAGAACAG	chr1	165105333	165105356	chr1	165107386	165107409
pgrna429	unknown119	Neutral	CTCCACTTCCTCTATAGGAA	GGTGAATCTCAGCAGAACAG	chr1	165105341	165105364	chr1	165107386	165107409
pgrna430	unknown119	Neutral	GAGGTGCAGCAAAAACACTG	GGCAGCTAAGTGCAAATCAG	chr1	165105568	165105591	chr1	165107528	165107551
pgrna431	unknown119	Neutral	GAGGTGCAGCAAAAACACTG	GAATGCCATGCATAGCACAG	chr1	165105568	165105591	chr1	165107434	165107457
pgrna432	unknown119	Neutral	CTGCAGATAGCATCTGAATA	GGCAGCTAAGTGCAAATCAG	chr1	165105536	165105559	chr1	165107528	165107551
pgrna433	unknown119	Neutral	ATAGATTTCTCTGGACTTCA	GGCAGCTAAGTGCAAATCAG	chr1	165105465	165105488	chr1	165107528	165107551
pgrna434	unknown1243	Neutral	TATAACTGTGGATTTCAGCA	GGAAGCTTCTTTTATCCCAA	chr2	129913356	129913379	chr2	129915688	129915711
pgrna435	unknown1243	Neutral	GCTAAGTTTAAGGTACCACT	TGGACATGACTACAGTCAGC	chr2	129913660	129913683	chr2	129915576	129915599
pgrna436	unknown1243	Neutral	AAGATCACAGACTATCAACA	GGAAGCTTCTTTTATCCCAA	chr2	129913331	129913354	chr2	129915688	129915711
pgrna437	unknown1243	Neutral	GCTAAGTTTAAGGTACCACT	GGAAGCTTCTTTTATCCCAA	chr2	129913660	129913683	chr2	129915688	129915711
pgrna438	unknown1243	Neutral	GCTAAGTTTAAGGTACCACT	AGACAAGCAGGACCAACAAG	chr2	129913660	129913683	chr2	129915643	129915666
pgrna439	unknown1243	Neutral	TATAACTGTGGATTTCAGCA	GCAAGGCTGCATTTCACTGT	chr2	129913356	129913379	chr2	129915332	129915355
pgrna440	unknown1243	Neutral	TTGAACCTTGTGCCCCCAAA	GGAAGCTTCTTTTATCCCAA	chr2	129913492	129913515	chr2	129915688	129915711
pgrna441	unknown1243	Neutral	TGCCTAAATGGTTGTCCCAG	GGAAGCTTCTTTTATCCCAA	chr2	129913645	129913668	chr2	129915688	129915711
pgrna442	unknown1243	Neutral	AAGATCACAGACTATCAACA	GCAAGGCTGCATTTCACTGT	chr2	129913331	129913354	chr2	129915332	129915355
pgrna443	unknown1243	Neutral	GCTAAGTTTAAGGTACCACT	GCAAGGCTGCATTTCACTGT	chr2	129913660	129913683	chr2	129915332	129915355
pgrna444	unknown1246	Neutral	TCTGTTAGTGACTTAGACCA	GCAGAAATCAAGCTCCCCTA	chr2	134614671	134614694	chr2	134616786	134616809
pgrna445	unknown1246	Neutral	AGCCCAGTATCTAACAGCAA	GGATGATTATGCCTAATTCG	chr2	134614727	134614750	chr2	134616895	134616918
pgrna446	unknown1246	Neutral	TCTAAGTCACTAACAGAGTG	GCAGAAATCAAGCTCCCCTA	chr2	134614665	134614688	chr2	134616786	134616809
pgrna447	unknown1246	Neutral	AGCCCAGTATCTAACAGCAA	GCAGAAATCAAGCTCCCCTA	chr2	134614727	134614750	chr2	134616786	134616809
pgrna448	unknown1246	Neutral	TATCATGAACAGCATGTGAG	GCAGAAATCAAGCTCCCCTA	chr2	134614851	134614874	chr2	134616786	134616809
pgrna449	unknown1246	Neutral	GTCCATTGCTGTTAGATACT	GCAGAAATCAAGCTCCCCTA	chr2	134614725	134614748	chr2	134616786	134616809
pgrna450	unknown1246	Neutral	GTCCATTGCTGTTAGATACT	CTACACTCAGAGGACCCAGT	chr2	134614725	134614748	chr2	134616581	134616604
pgrna451	unknown1246	Neutral	TCTGTTAGTGACTTAGACCA	GGATGATTATGCCTAATTCG	chr2	134614671	134614694	chr2	134616895	134616918
pgrna452	unknown1246	Neutral	GTCCATTGCTGTTAGATACT	CCAGTTGATTTCAAAGCCCA	chr2	134614725	134614748	chr2	134616512	134616535
pgrna453	unknown1246	Neutral	TCTAAGTCACTAACAGAGTG	GGATGATTATGCCTAATTCG	chr2	134614665	134614688	chr2	134616895	134616918
pgrna454	unknown1248	Neutral	GTATACTATAGTGGGTACAG	CAAGATCTCCTATTCTGCAA	chr2	137224139	137224162	chr2	137225836	137225859
pgrna455	unknown1248	Neutral	ATAATACTCTTTCTCCTAAA	GGAATTTACTATTAAACTGT	chr2	137224340	137224363	chr2	137226211	137226234
pgrna456	unknown1248	Neutral	GTATACTATAGTGGGTACAG	TCTACCAGACACTACAAAGG	chr2	137224139	137224162	chr2	137226179	137226202
pgrna457	unknown1248	Neutral	GTATACTATAGTGGGTACAG	ACATCTACCAGACACTACAA	chr2	137224139	137224162	chr2	137226182	137226205
pgrna458	unknown1248	Neutral	GTATACTATAGTGGGTACAG	TGTTTGGTGACAGAATTATG	chr2	137224139	137224162	chr2	137225880	137225903
pgrna459	unknown1248	Neutral	GTAAAATGTGTATACTATAG	CAAGATCTCCTATTCTGCAA	chr2	137224130	137224153	chr2	137225836	137225859
pgrna460	unknown1248	Neutral	GTATACTATAGTGGGTACAG	TCAAGATCTCCTATTCTGCA	chr2	137224139	137224162	chr2	137225837	137225860
pgrna461	unknown1248	Neutral	GTAAAATGTGTATACTATAG	TCTACCAGACACTACAAAGG	chr2	137224130	137224153	chr2	137226179	137226202
pgrna462	unknown1248	Neutral	GTAAAATGTGTATACTATAG	ACATCTACCAGACACTACAA	chr2	137224130	137224153	chr2	137226182	137226205
pgrna463	unknown1248	Neutral	GTAAAATGTGTATACTATAG	TGTTTGGTGACAGAATTATG	chr2	137224130	137224153	chr2	137225880	137225903
pgrna464	unknown1249	Neutral	GTGTACTGAGGTGCTCAGAG	TTGGATAGCGAAGAAAAAAA	chr2	137461823	137461846	chr2	137463821	137463844
pgrna465	unknown1249	Neutral	GCTTTGTTGTCTTGAAATCG	GACCTTTCTAAAATGCTCGC	chr2	137461945	137461968	chr2	137464006	137464029
pgrna466	unknown1249	Neutral	GTGTACTGAGGTGCTCAGAG	TCTAACCTACTATAAAATAA	chr2	137461823	137461846	chr2	137463679	137463702
pgrna467	unknown1249	Neutral	GTGTACTGAGGTGCTCAGAG	CTATTTCTTGAAGGGCCTTG	chr2	137461823	137461846	chr2	137464103	137464126
pgrna468	unknown1249	Neutral	GTGTACTGAGGTGCTCAGAG	GTTCTAAGATTTCATAGAAG	chr2	137461823	137461846	chr2	137463942	137463965
pgrna469	unknown1249	Neutral	GCTTTGTTGTCTTGAAATCG	TTGGATAGCGAAGAAAAAAA	chr2	137461945	137461968	chr2	137463821	137463844
pgrna470	unknown1249	Neutral	GCTTTGTTGTCTTGAAATCG	TCTAACCTACTATAAAATAA	chr2	137461945	137461968	chr2	137463679	137463702
pgrna471	unknown1249	Neutral	GCTTTGTTGTCTTGAAATCG	CTATTTCTTGAAGGGCCTTG	chr2	137461945	137461968	chr2	137464103	137464126
pgrna472	unknown1249	Neutral	GCTTTGTTGTCTTGAAATCG	GTTCTAAGATTTCATAGAAG	chr2	137461945	137461968	chr2	137463942	137463965
pgrna473	unknown1249	Neutral	GTGTACTGAGGTGCTCAGAG	GACCTTTCTAAAATGCTCGC	chr2	137461823	137461846	chr2	137464006	137464029
pgrna474	unknown1479	Neutral	GCTGAGTGATTGATAGGCTG	ACCACATCCAGGAAACCGGG	chr22	27373471	27373494	chr22	27375360	27375383
pgrna475	unknown1479	Neutral	AGCCAACAGTGACAACCACG	GATAGCAGTAAAATCAGGAG	chr22	27373073	27373096	chr22	27375211	27375234
pgrna476	unknown1479	Neutral	GACAGCTGTGGACTCCCAGA	ACCACATCCAGGAAACCGGG	chr22	27373309	27373332	chr22	27375360	27375383
pgrna477	unknown1479	Neutral	GCTGAGTGATTGATAGGCTG	CCCATCCTCCATCTACTCCG	chr22	27373471	27373494	chr22	27374936	27374959
pgrna478	unknown1479	Neutral	GACAGCTGTGGACTCCCAGA	CCCATCCTCCATCTACTCCG	chr22	27373309	27373332	chr22	27374936	27374959
pgrna479	unknown1479	Neutral	GCTGAGTGATTGATAGGCTG	CCAAGCCTCGGAGTAGATGG	chr22	27373471	27373494	chr22	27374941	27374964
pgrna480	unknown1479	Neutral	GCTGAGTGATTGATAGGCTG	TGATGTTGATCACTCAAGCA	chr22	27373471	27373494	chr22	27375262	27375285
pgrna481	unknown1479	Neutral	GACAGCTGTGGACTCCCAGA	CCAAGCCTCGGAGTAGATGG	chr22	27373309	27373332	chr22	27374941	27374964
pgrna482	unknown1479	Neutral	GACAGCTGTGGACTCCCAGA	TGATGTTGATCACTCAAGCA	chr22	27373309	27373332	chr22	27375262	27375285
pgrna483	unknown1479	Neutral	GCTGTCAGAAGGAGATCAGT	ACCACATCCAGGAAACCGGG	chr22	27373292	27373315	chr22	27375360	27375383
pgrna484	unknown1480	Neutral	GTAAGTCCCTGGCTAATGAG	GCTTGAGTAAGACTGACAGG	chr22	27906719	27906742	chr22	27908756	27908779
pgrna485	unknown1480	Neutral	AGTCTACTGTAGGAACTTAG	GCTCGTGGCTTCAGGCCAAG	chr22	27907051	27907074	chr22	27908625	27908648
pgrna486	unknown1480	Neutral	GCTCTACTGAGGAAAGCGAG	GCTTGAGTAAGACTGACAGG	chr22	27906828	27906851	chr22	27908756	27908779
pgrna487	unknown1480	Neutral	GTAAGTCCCTGGCTAATGAG	CTGTCAGTCTTACTCAAGCA	chr22	27906719	27906742	chr22	27908752	27908775
pgrna488	unknown1480	Neutral	AGTCTACTGTAGGAACTTAG	GCTTGAGTAAGACTGACAGG	chr22	27907051	27907074	chr22	27908756	27908779
pgrna489	unknown1480	Neutral	GTAAGTCCCTGGCTAATGAG	GCTCGTGGCTTCAGGCCAAG	chr22	27906719	27906742	chr22	27908625	27908648
pgrna490	unknown1480	Neutral	GCTCTACTGAGGAAAGCGAG	CTGTCAGTCTTACTCAAGCA	chr22	27906828	27906851	chr22	27908752	27908775
pgrna491	unknown1480	Neutral	ATTAGCCAGGGACTTACAGG	GCTTGAGTAAGACTGACAGG	chr22	27906725	27906748	chr22	27908756	27908779
pgrna492	unknown1480	Neutral	GCTCTACTGAGGAAAGCGAG	GCTCGTGGCTTCAGGCCAAG	chr22	27906828	27906851	chr22	27908625	27908648
pgrna493	unknown1480	Neutral	GGATGCAGTAGGCTCTACTG	GCTTGAGTAAGACTGACAGG	chr22	27906817	27906840	chr22	27908756	27908779
pgrna494	unknown1483	Neutral	GTATGGGGTGAGCATTTTCA	GGTTAGTGTTAATTGAGCCA	chr22	35042292	35042315	chr22	35044080	35044103
pgrna495	unknown1483	Neutral	GTATGGGGTGAGCATTTTCA	GTAGTGCAGAATGCTACTGT	chr22	35042292	35042315	chr22	35043989	35044012
pgrna496	unknown1483	Neutral	AGAAACATCACAGTTTCCTG	GGTTAGTGTTAATTGAGCCA	chr22	35042129	35042152	chr22	35044080	35044103
pgrna497	unknown1483	Neutral	TATGGGGTGAGCATTTTCAG	GGTTAGTGTTAATTGAGCCA	chr22	35042293	35042316	chr22	35044080	35044103
pgrna498	unknown1483	Neutral	GTATGGGGTGAGCATTTTCA	CTACAGACGTATGTTGCCGT	chr22	35042292	35042315	chr22	35043970	35043993
pgrna499	unknown1483	Neutral	GTATGGGGTGAGCATTTTCA	GGCCTATCCTCTAGGTACAA	chr22	35042292	35042315	chr22	35044141	35044164
pgrna500	unknown1483	Neutral	TATCATACTCCACTTGTGAG	GGTTAGTGTTAATTGAGCCA	chr22	35042347	35042370	chr22	35044080	35044103
pgrna501	unknown1483	Neutral	AGAAACATCACAGTTTCCTG	GGCCTATCCTCTAGGTACAA	chr22	35042129	35042152	chr22	35044141	35044164
pgrna502	unknown1483	Neutral	GTATGGGGTGAGCATTTTCA	GTAGTCCAGGATGCTATTGT	chr22	35042292	35042315	chr22	35044162	35044185
pgrna503	unknown1483	Neutral	AGAAACATCACAGTTTCCTG	GTAGTCCAGGATGCTATTGT	chr22	35042129	35042152	chr22	35044162	35044185
pgrna504	unknown1484	Neutral	TTAACACTACTGACAAAGGC	GCCAGTATACTTACTCCCAA	chr22	35219032	35219055	chr22	35220694	35220717
pgrna505	unknown1484	Neutral	GGCAAACCCTCATCTCTCAA	CTAGCATTGGGGAAAAAGAG	chr22	35218957	35218980	chr22	35220863	35220886
pgrna506	unknown1484	Neutral	CTACACTGCTACCACCAACA	GCCAGTATACTTACTCCCAA	chr22	35219007	35219030	chr22	35220694	35220717
pgrna507	unknown1484	Neutral	TTAACACTACTGACAAAGGC	GCAATTGACTTACCCTTTGA	chr22	35219032	35219055	chr22	35220643	35220666
pgrna508	unknown1484	Neutral	ATGTTGGTGGTAGCAGTGTA	GCCAGTATACTTACTCCCAA	chr22	35219009	35219032	chr22	35220694	35220717
pgrna509	unknown1484	Neutral	GGCAAACCCTCATCTCTCAA	GCCAGTATACTTACTCCCAA	chr22	35218957	35218980	chr22	35220694	35220717
pgrna510	unknown1484	Neutral	CACTACTGACAAAGGCCGGC	GCCAGTATACTTACTCCCAA	chr22	35219036	35219059	chr22	35220694	35220717
pgrna511	unknown1484	Neutral	CTACACTGCTACCACCAACA	GCAATTGACTTACCCTTTGA	chr22	35219007	35219030	chr22	35220643	35220666
pgrna512	unknown1484	Neutral	GGCAAACCCTCATCTCTCAA	CCAGTATACTTACTCCCAAG	chr22	35218957	35218980	chr22	35220695	35220718
pgrna513	unknown1484	Neutral	GGCAAACCCTCATCTCTCAA	TGATGATTATCCAATCACAC	chr22	35218957	35218980	chr22	35220448	35220471
pgrna514	unknown1485	Neutral	GGAGACACGCAAGTCATACC	TCAGCCCGTGGAGGATAAGA	chr22	36479484	36479507	chr22	36481236	36481259
pgrna515	unknown1485	Neutral	GGAGACACGCAAGTCATACC	CTCCCCATCTCAAGACAGGC	chr22	36479484	36479507	chr22	36481185	36481208
pgrna516	unknown1485	Neutral	GATCACAAGATATCAGGGGA	TCAGCCCGTGGAGGATAAGA	chr22	36479368	36479391	chr22	36481236	36481259
pgrna517	unknown1485	Neutral	CCCTGATCACAAGATATCAG	GCCTGTCTTGAGATGGGGAG	chr22	36479364	36479387	chr22	36481188	36481211
pgrna518	unknown1485	Neutral	CCCTGATCACAAGATATCAG	GTGGAGGATAAGAGGGTGCA	chr22	36479364	36479387	chr22	36481243	36481266
pgrna519	unknown1485	Neutral	TTATAATCTCCAATTTGGGC	GCCTGTCTTGAGATGGGGAG	chr22	36479680	36479703	chr22	36481188	36481211
pgrna520	unknown1485	Neutral	TTATAATCTCCAATTTGGGC	GTGGAGGATAAGAGGGTGCA	chr22	36479680	36479703	chr22	36481243	36481266
pgrna521	unknown1485	Neutral	TGTTGGAGTTGGGTGGTCCA	GCCTGTCTTGAGATGGGGAG	chr22	36479396	36479419	chr22	36481188	36481211
pgrna522	unknown1485	Neutral	GGAGACACGCAAGTCATACC	TGCACCCTCTTATCCTCCAC	chr22	36479484	36479507	chr22	36481240	36481263
pgrna523	unknown1485	Neutral	GGAGACACGCAAGTCATACC	GCCTGTCTTGAGATGGGGAG	chr22	36479484	36479507	chr22	36481188	36481211
pgrna524	unknown1486	Neutral	GTTGGCTAGGGCAGGCCGAA	GTTTCCTCTGAGTCTCCTGG	chr22	45466224	45466247	chr22	45468472	45468495
pgrna525	unknown1486	Neutral	GTTGGCTAGGGCAGGCCGAA	AGACTTTCCACTAAGTCCCG	chr22	45466224	45466247	chr22	45468526	45468549
pgrna526	unknown1486	Neutral	ACTGAGACCATGAGCCCTGG	GTTTCCTCTGAGTCTCCTGG	chr22	45466332	45466355	chr22	45468472	45468495
pgrna527	unknown1486	Neutral	GGGTATAAAGTGACGAGGAG	GTTTCCTCTGAGTCTCCTGG	chr22	45466598	45466621	chr22	45468472	45468495
pgrna528	unknown1486	Neutral	GTTGGCTAGGGCAGGCCGAA	GACTTTCCACTAAGTCCCGA	chr22	45466224	45466247	chr22	45468527	45468550
pgrna529	unknown1486	Neutral	ACTGAGACCATGAGCCCTGG	GACTTTCCACTAAGTCCCGA	chr22	45466332	45466355	chr22	45468527	45468550
pgrna530	unknown1486	Neutral	GCACAGAGGCTGGTTGGCTA	GTTTCCTCTGAGTCTCCTGG	chr22	45466212	45466235	chr22	45468472	45468495
pgrna531	unknown1486	Neutral	GGAGAAGCAACTAAGGGCCT	GTTTCCTCTGAGTCTCCTGG	chr22	45466291	45466314	chr22	45468472	45468495
pgrna532	unknown1486	Neutral	GGGTATAAAGTGACGAGGAG	GACTTTCCACTAAGTCCCGA	chr22	45466598	45466621	chr22	45468527	45468550
pgrna533	unknown1486	Neutral	GCACAGAGGCTGGTTGGCTA	GACTTTCCACTAAGTCCCGA	chr22	45466212	45466235	chr22	45468527	45468550
pgrna534	unknown1487	Neutral	GGCCCTCCTTGACTCCCGGA	TATATCGTCATATAGCAGAG	chr22	47655455	47655478	chr22	47657035	47657058
pgrna535	unknown1487	Neutral	AGGAGGGCCCAACAGTAGAG	GGTGGCTCAATGCATTTGCA	chr22	47655441	47655464	chr22	47657292	47657315
pgrna536	unknown1487	Neutral	CTACAATTCAGGGCAGGGGG	GATATATCGTCATATAGCAG	chr22	47655178	47655201	chr22	47657037	47657060
pgrna537	unknown1487	Neutral	AGGAGGGCCCAACAGTAGAG	GATATATCGTCATATAGCAG	chr22	47655441	47655464	chr22	47657037	47657060
pgrna538	unknown1487	Neutral	TGAAGGCTTTTACTATCTGG	GATATATCGTCATATAGCAG	chr22	47655401	47655424	chr22	47657037	47657060
pgrna539	unknown1487	Neutral	GGCCCTCCTTGACTCCCGGA	AAGATGGTACGCAGACCAAG	chr22	47655455	47655478	chr22	47657247	47657270
pgrna540	unknown1487	Neutral	CTAGGAGTCAGAATCTCAGA	GATATATCGTCATATAGCAG	chr22	47655317	47655340	chr22	47657037	47657060
pgrna541	unknown1487	Neutral	GATTTCCCTCTGATCCCAGC	TATATCGTCATATAGCAGAG	chr22	47655602	47655625	chr22	47657035	47657058
pgrna542	unknown1487	Neutral	GATTTCCCTCTGATCCCAGC	AAGATGGTACGCAGACCAAG	chr22	47655602	47655625	chr22	47657247	47657270
pgrna543	unknown1487	Neutral	CTACAATTCAGGGCAGGGGG	GGTGGCTCAATGCATTTGCA	chr22	47655178	47655201	chr22	47657292	47657315
pgrna544	unknown1488	Neutral	GCATACAGTCTGTCATTGCC	GTTATTACTTCTGAAGACCA	chr22	47948795	47948818	chr22	47950805	47950828
pgrna545	unknown1488	Neutral	ATTCGGGTCCACCCAAAACC	GCCCCATATCATTCTTTAAG	chr22	47948862	47948885	chr22	47950573	47950596
pgrna546	unknown1488	Neutral	ATCACATTCCAGGTTTTGGG	GTTATTACTTCTGAAGACCA	chr22	47948870	47948893	chr22	47950805	47950828
pgrna547	unknown1488	Neutral	ATTCGGGTCCACCCAAAACC	GTTATTACTTCTGAAGACCA	chr22	47948862	47948885	chr22	47950805	47950828
pgrna548	unknown1488	Neutral	GTTTGAGGCCAGGCTGAAGT	GTTATTACTTCTGAAGACCA	chr22	47949107	47949130	chr22	47950805	47950828
pgrna549	unknown1488	Neutral	GCATACAGTCTGTCATTGCC	GCCACTTAAAGAATGATATG	chr22	47948795	47948818	chr22	47950574	47950597
pgrna550	unknown1488	Neutral	GCATACAGTCTGTCATTGCC	GCCCCATATCATTCTTTAAG	chr22	47948795	47948818	chr22	47950573	47950596
pgrna551	unknown1488	Neutral	ATCACATTCCAGGTTTTGGG	GCCACTTAAAGAATGATATG	chr22	47948870	47948893	chr22	47950574	47950597
pgrna552	unknown1488	Neutral	ATTCGGGTCCACCCAAAACC	GCCACTTAAAGAATGATATG	chr22	47948862	47948885	chr22	47950574	47950597
pgrna553	unknown1488	Neutral	ATCACATTCCAGGTTTTGGG	GCCCCATATCATTCTTTAAG	chr22	47948870	47948893	chr22	47950573	47950596
pgrna554	unknown1587	Neutral	GTAAAAATGTTAACAAGCCT	GTAGCAGAAAAACACCCACA	chr3	87900242	87900265	chr3	87901812	87901835
pgrna555	unknown1587	Neutral	GATATAGGTGGTGGGATGGC	TGGTTTAACTAACATTGTAG	chr3	87900201	87900224	chr3	87902092	87902115
pgrna556	unknown1587	Neutral	CCAAAACTAATGCTAGCAAC	GTAGCAGAAAAACACCCACA	chr3	87899992	87900015	chr3	87901812	87901835
pgrna557	unknown1587	Neutral	GATATAGGTGGTGGGATGGC	GTAGCAGAAAAACACCCACA	chr3	87900201	87900224	chr3	87901812	87901835
pgrna558	unknown1587	Neutral	GTAAAAATGTTAACAAGCCT	ATATTATAAAATCTATCGAG	chr3	87900242	87900265	chr3	87902184	87902207
pgrna559	unknown1587	Neutral	ATGAACTCTGATCATGAAAA	GTAGCAGAAAAACACCCACA	chr3	87899895	87899918	chr3	87901812	87901835
pgrna560	unknown1587	Neutral	GTAAAAATGTTAACAAGCCT	TGGTTTAACTAACATTGTAG	chr3	87900242	87900265	chr3	87902092	87902115
pgrna561	unknown1587	Neutral	GTAAAAATGTTAACAAGCCT	GAAAAGAAGATTACTAAGGG	chr3	87900242	87900265	chr3	87901880	87901903
pgrna562	unknown1587	Neutral	GATATAGGTGGTGGGATGGC	ATATTATAAAATCTATCGAG	chr3	87900201	87900224	chr3	87902184	87902207
pgrna563	unknown1587	Neutral	CCAAAACTAATGCTAGCAAC	GAAAAGAAGATTACTAAGGG	chr3	87899992	87900015	chr3	87901880	87901903
pgrna564	unknown1613	Neutral	TGTCCAGCCCTGCATCCCAG	GAGACCTTATAATTCTCACC	chr3	104652963	104652986	chr3	104654517	104654540
pgrna565	unknown1613	Neutral	GCAAAGCCTTCAAACTCAAC	GAGACCTTATAATTCTCACC	chr3	104652820	104652843	chr3	104654517	104654540
pgrna566	unknown1613	Neutral	TGTCCAGCCCTGCATCCCAG	GAGAACTCACTAAAATAGGG	chr3	104652963	104652986	chr3	104654636	104654659
pgrna567	unknown1613	Neutral	GGCAAAGAAGTCAAGCCGCT	TTTATGTTATTTGGAAACCA	chr3	104652948	104652971	chr3	104654593	104654616
pgrna568	unknown1613	Neutral	GCATACTCTAGGACTGAGAT	TTTATGTTATTTGGAAACCA	chr3	104652853	104652876	chr3	104654593	104654616
pgrna569	unknown1613	Neutral	GCAAAGCCTTCAAACTCAAC	TTTATGTTATTTGGAAACCA	chr3	104652820	104652843	chr3	104654593	104654616
pgrna570	unknown1613	Neutral	TGTCCAGCCCTGCATCCCAG	GAACTCACTAAAATAGGGTG	chr3	104652963	104652986	chr3	104654638	104654661
pgrna571	unknown1613	Neutral	GGCAAAGAAGTCAAGCCGCT	GAGACCTTATAATTCTCACC	chr3	104652948	104652971	chr3	104654517	104654540
pgrna572	unknown1613	Neutral	GCATACTCTAGGACTGAGAT	GAGACCTTATAATTCTCACC	chr3	104652853	104652876	chr3	104654517	104654540
pgrna573	unknown1613	Neutral	GGCAAAGAAGTCAAGCCGCT	GAGAACTCACTAAAATAGGG	chr3	104652948	104652971	chr3	104654636	104654659
pgrna574	unknown1900	Neutral	GTGTTAGTCTGGAAGAGCAT	ACATGAGACTACCAATAGCG	chr4	158389459	158389482	chr4	158391314	158391337
pgrna575	unknown1900	Neutral	GCATAGGTGCAGTGTTCATG	CCATTGACAGCAACCAGCCG	chr4	158389443	158389466	chr4	158391439	158391462
pgrna576	unknown1900	Neutral	GTGTTAGTCTGGAAGAGCAT	TGAGACTACCAATAGCGGGG	chr4	158389459	158389482	chr4	158391317	158391340
pgrna577	unknown1900	Neutral	GTGTTAGTCTGGAAGAGCAT	CCATTGACAGCAACCAGCCG	chr4	158389459	158389482	chr4	158391439	158391462
pgrna578	unknown1900	Neutral	GTGTTAGTCTGGAAGAGCAT	GCCTTCATCCATGTGAAACA	chr4	158389459	158389482	chr4	158391405	158391428
pgrna579	unknown1900	Neutral	GTGTTAGTCTGGAAGAGCAT	TGGTAGTCTCATGTGTGCCA	chr4	158389459	158389482	chr4	158391305	158391328
pgrna580	unknown1900	Neutral	ATGCTCTTCCAGACTAACAC	GCCTTCATCCATGTGAAACA	chr4	158389462	158389485	chr4	158391405	158391428
pgrna581	unknown1900	Neutral	GCATAGGTGCAGTGTTCATG	ACATGAGACTACCAATAGCG	chr4	158389443	158389466	chr4	158391314	158391337
pgrna582	unknown1900	Neutral	TGCTCTTCCAGACTAACACC	GCCTTCATCCATGTGAAACA	chr4	158389463	158389486	chr4	158391405	158391428
pgrna583	unknown1900	Neutral	GCATAGGTGCAGTGTTCATG	TGAGACTACCAATAGCGGGG	chr4	158389443	158389466	chr4	158391317	158391340
pgrna584	unknown1905	Neutral	GCTGTTTTACAACTCCCCTC	TCTGATTTAATATCAGAAGG	chr4	161069849	161069872	chr4	161071933	161071956
pgrna585	unknown1905	Neutral	CAGTTCTTATGAAATTACAC	GATATTTTAGCCTTGATAAC	chr4	161069888	161069911	chr4	161071883	161071906
pgrna586	unknown1905	Neutral	GCTGTTTTACAACTCCCCTC	AGAATTTCAGACATATTGAA	chr4	161069849	161069872	chr4	161071646	161071669
pgrna587	unknown1905	Neutral	GCTGTTTTACAACTCCCCTC	TTACACTTAAGTCAAGGTCA	chr4	161069849	161069872	chr4	161071785	161071808
pgrna588	unknown1905	Neutral	GCTGTTTTACAACTCCCCTC	TGATGAAAGGAACACAGTAG	chr4	161069849	161069872	chr4	161071845	161071868
pgrna589	unknown1905	Neutral	ATAAGAACTGCTAACTTCCG	GGAATCTGAATGCAGAGTTA	chr4	161069875	161069898	chr4	161071764	161071787
pgrna590	unknown1905	Neutral	GCTGTTTTACAACTCCCCTC	AACCAGATCTCCAAAGAAGA	chr4	161069849	161069872	chr4	161071723	161071746
pgrna591	unknown1905	Neutral	ATAAGAACTGCTAACTTCCG	GATATTTTAGCCTTGATAAC	chr4	161069875	161069898	chr4	161071883	161071906
pgrna592	unknown1905	Neutral	ATAAGAACTGCTAACTTCCG	GTGAAAGGGGTGCAATGCAG	chr4	161069875	161069898	chr4	161071685	161071708
pgrna593	unknown1905	Neutral	CAGTTCTTATGAAATTACAC	GGAATCTGAATGCAGAGTTA	chr4	161069888	161069911	chr4	161071764	161071787
pgrna594	unknown2199	Neutral	CTAATGCCCTGAAAGAACCA	GTGACAACTAACTCCTCACC	chr6	18778755	18778778	chr6	18780515	18780538
pgrna595	unknown2199	Neutral	TGTGAAGACGTCACATCCCC	GATGGAGGAGTTGGACAAAT	chr6	18779016	18779039	chr6	18780611	18780634
pgrna596	unknown2199	Neutral	CTAATGCCCTGAAAGAACCA	GATGGAGGAGTTGGACAAAT	chr6	18778755	18778778	chr6	18780611	18780634
pgrna597	unknown2199	Neutral	GGAAAATCATTCTTTCCAAA	GTGACAACTAACTCCTCACC	chr6	18778899	18778922	chr6	18780515	18780538
pgrna598	unknown2199	Neutral	GGAAAATCATTCTTTCCAAA	GATGGAGGAGTTGGACAAAT	chr6	18778899	18778922	chr6	18780611	18780634
pgrna599	unknown2199	Neutral	TATCTATCACAAATAACCTG	GTGACAACTAACTCCTCACC	chr6	18779032	18779055	chr6	18780515	18780538
pgrna600	unknown2199	Neutral	TATCTATCACAAATAACCTG	GATGGAGGAGTTGGACAAAT	chr6	18779032	18779055	chr6	18780611	18780634
pgrna601	unknown2199	Neutral	GCCAATGGTTACAGTGCAAA	GTGACAACTAACTCCTCACC	chr6	18778816	18778839	chr6	18780515	18780538
pgrna602	unknown2199	Neutral	GCCAATGGTTACAGTGCAAA	GATGGAGGAGTTGGACAAAT	chr6	18778816	18778839	chr6	18780611	18780634
pgrna603	unknown2199	Neutral	TGTGAAGACGTCACATCCCC	GTGACAACTAACTCCTCACC	chr6	18779016	18779039	chr6	18780515	18780538
pgrna604	unknown2201	Neutral	GCGAGGATTTTATTGTGGAG	TCTTAAGAACTGTTTAGCGG	chr6	19234862	19234885	chr6	19236379	19236402
pgrna605	unknown2201	Neutral	GAAGAATATGTGGTGCACTG	TTAACATTCTTGTATCTCCT	chr6	19234780	19234803	chr6	19236800	19236823
pgrna606	unknown2201	Neutral	GCGAGGATTTTATTGTGGAG	TTAACATTCTTGTATCTCCT	chr6	19234862	19234885	chr6	19236800	19236823
pgrna607	unknown2201	Neutral	GCTCAGGACTACATGGTCAG	TCTTAAGAACTGTTTAGCGG	chr6	19234506	19234529	chr6	19236379	19236402
pgrna608	unknown2201	Neutral	GCTCAGGACTACATGGTCAG	TTAACATTCTTGTATCTCCT	chr6	19234506	19234529	chr6	19236800	19236823
pgrna609	unknown2201	Neutral	GTGGGGACTATTTTGCCTGA	TCTTAAGAACTGTTTAGCGG	chr6	19234737	19234760	chr6	19236379	19236402
pgrna610	unknown2201	Neutral	GCGAGGATTTTATTGTGGAG	ACCTCTTAAGAACTGTTTAG	chr6	19234862	19234885	chr6	19236382	19236405
pgrna611	unknown2201	Neutral	GTGGGGACTATTTTGCCTGA	TTAACATTCTTGTATCTCCT	chr6	19234737	19234760	chr6	19236800	19236823
pgrna612	unknown2201	Neutral	GCTCAGGACTACATGGTCAG	ACCTCTTAAGAACTGTTTAG	chr6	19234506	19234529	chr6	19236382	19236405
pgrna613	unknown2201	Neutral	GAAGAATATGTGGTGCACTG	TCTTAAGAACTGTTTAGCGG	chr6	19234780	19234803	chr6	19236379	19236402
pgrna614	unknown2204	Neutral	AGGGAGATAGAATTCCTGGG	GGACAGGCTATACCATTGCA	chr6	21419905	21419928	chr6	21421803	21421826
pgrna615	unknown2204	Neutral	AGGGAGATAGAATTCCTGGG	GACAGGCTATACCATTGCAG	chr6	21419905	21419928	chr6	21421802	21421825
pgrna616	unknown2204	Neutral	TCTAGAACTAAAGAAAGCAG	GACAGGCTATACCATTGCAG	chr6	21419847	21419870	chr6	21421802	21421825
pgrna617	unknown2205	Neutral	GCATGACTGGACAAATATGG	ATAGTCCTACTCTTTTAGAA	chr6	22442717	22442740	chr6	22444668	22444691
pgrna618	unknown2205	Neutral	GGTCTATTGGTAATAACTGG	TCATGTTTCCATGCTTAAGA	chr6	22442696	22442719	chr6	22444697	22444720
pgrna619	unknown2205	Neutral	GGTCTATTGGTAATAACTGG	ATAGTCCTACTCTTTTAGAA	chr6	22442696	22442719	chr6	22444668	22444691
pgrna620	unknown2205	Neutral	GCATGACTGGACAAATATGG	CTGAGTTATACAAGTAAGCG	chr6	22442717	22442740	chr6	22444814	22444837
pgrna621	unknown2205	Neutral	GCATGACTGGACAAATATGG	GTAAAGCCCTCCAGCTCTCA	chr6	22442717	22442740	chr6	22445018	22445041
pgrna622	unknown2205	Neutral	GCATGACTGGACAAATATGG	TCATGTTTCCATGCTTAAGA	chr6	22442717	22442740	chr6	22444697	22444720
pgrna623	unknown2205	Neutral	GGACAAATATGGGGGTCTAT	ATAGTCCTACTCTTTTAGAA	chr6	22442709	22442732	chr6	22444668	22444691
pgrna624	unknown2205	Neutral	GCATGACTGGACAAATATGG	CTGCCATGAGTCCTAGAAGA	chr6	22442717	22442740	chr6	22444979	22445002
pgrna625	unknown2205	Neutral	GGTCTATTGGTAATAACTGG	CTGAGTTATACAAGTAAGCG	chr6	22442696	22442719	chr6	22444814	22444837
pgrna626	unknown2205	Neutral	GGTCTATTGGTAATAACTGG	GTAAAGCCCTCCAGCTCTCA	chr6	22442696	22442719	chr6	22445018	22445041
pgrna627	unknown2342	Neutral	CTATGAGGCAGGTCATTAAC	GCAGGTCTGGTTTCTAGTAG	chr6	133253235	133253258	chr6	133255463	133255486
pgrna628	unknown2342	Neutral	GTTCTGATGCTGCCTGACAG	GGTCACTCATACCAGACCCT	chr6	133253337	133253360	chr6	133255221	133255244
pgrna629	unknown2342	Neutral	CATGAACTCTATAATTTAAA	GCAGGTCTGGTTTCTAGTAG	chr6	133253367	133253390	chr6	133255463	133255486
pgrna630	unknown2342	Neutral	GTTCTGATGCTGCCTGACAG	GCAGGTCTGGTTTCTAGTAG	chr6	133253337	133253360	chr6	133255463	133255486
pgrna631	unknown2342	Neutral	TAAAGGCCTTAAACCACACA	GCAGGTCTGGTTTCTAGTAG	chr6	133253211	133253234	chr6	133255463	133255486
pgrna632	unknown2342	Neutral	CTATGAGGCAGGTCATTAAC	GGTCACTCATACCAGACCCT	chr6	133253235	133253258	chr6	133255221	133255244
pgrna633	unknown2342	Neutral	GAGGCAGGTCATTAACCGGC	GCAGGTCTGGTTTCTAGTAG	chr6	133253239	133253262	chr6	133255463	133255486
pgrna634	unknown2342	Neutral	CATGAACTCTATAATTTAAA	GGTCACTCATACCAGACCCT	chr6	133253367	133253390	chr6	133255221	133255244
pgrna635	unknown2342	Neutral	GTTCTGATGCTGCCTGACAG	ACTAGAAACCAGACCTGCAG	chr6	133253337	133253360	chr6	133255458	133255481
pgrna636	unknown2342	Neutral	GTTCTGATGCTGCCTGACAG	ACAAACTCAACCTTGAACGG	chr6	133253337	133253360	chr6	133255495	133255518
pgrna637	unknown2345	Neutral	GATTCCAGCTGAAGCCCTGA	AGATCTATGTGGCTATACAG	chr6	137925126	137925149	chr6	137926865	137926888
pgrna638	unknown2345	Neutral	TGTAAATCATCCCAACGGAG	GGTCTGTTCCTGTCTTCCTT	chr6	137924967	137924990	chr6	137927235	137927258
pgrna639	unknown2345	Neutral	TTTACAGAGCCCCCTCAGCA	GGTCTGTTCCTGTCTTCCTT	chr6	137924984	137925007	chr6	137927235	137927258
pgrna640	unknown2345	Neutral	TTTACAGAGCCCCCTCAGCA	GATGTCACCTAGATGTAACT	chr6	137924984	137925007	chr6	137926915	137926938
pgrna641	unknown2345	Neutral	GTCAAACTCCAGGCAGAATG	AGATCTATGTGGCTATACAG	chr6	137925267	137925290	chr6	137926865	137926888
pgrna642	unknown2345	Neutral	GGAGTTTGACCCCATTTCTG	AGATCTATGTGGCTATACAG	chr6	137925254	137925277	chr6	137926865	137926888
pgrna643	unknown2345	Neutral	TTTACAGAGCCCCCTCAGCA	GGTGGTAAGTCAAGACACCT	chr6	137924984	137925007	chr6	137927182	137927205
pgrna644	unknown2370	Neutral	GTATGCCGTAATATAATTCG	AGTAAGTGCACAGTGAACCA	chr6	164987448	164987471	chr6	164988995	164989018
pgrna645	unknown2370	Neutral	AGGGTTGGTCAATTTTCACC	GGTTCACTGTGCACTTACTG	chr6	164987270	164987293	chr6	164988999	164989022
pgrna646	unknown2370	Neutral	GTATGCCGTAATATAATTCG	GGTTCACTGTGCACTTACTG	chr6	164987448	164987471	chr6	164988999	164989022
pgrna647	unknown2370	Neutral	GTGTATGCCGTAATATAATT	AGTAAGTGCACAGTGAACCA	chr6	164987446	164987469	chr6	164988995	164989018
pgrna648	unknown2370	Neutral	CTTTTCCCCGAATTATATTA	GGTTCACTGTGCACTTACTG	chr6	164987453	164987476	chr6	164988999	164989022
pgrna649	unknown2370	Neutral	GTATGCCGTAATATAATTCG	TGGTAAAGTTAGTATTGCAT	chr6	164987448	164987471	chr6	164989304	164989327
pgrna650	unknown2370	Neutral	GTATGCCGTAATATAATTCG	ATATATGCATGGCATGCTTG	chr6	164987448	164987471	chr6	164989409	164989432
pgrna651	unknown2370	Neutral	GTATGCCGTAATATAATTCG	TTTAGGCTCACCCACTATGT	chr6	164987448	164987471	chr6	164989172	164989195
pgrna652	unknown2370	Neutral	TCTGAAGGGTCCTTAAACAC	GGTTCACTGTGCACTTACTG	chr6	164987087	164987110	chr6	164988999	164989022
pgrna653	unknown2370	Neutral	GTGTATGCCGTAATATAATT	GGTTCACTGTGCACTTACTG	chr6	164987446	164987469	chr6	164988999	164989022
pgrna654	unknown2372	Neutral	CTAACAGTCACAAAATTACC	GTTCAGGCCGAAGAATCCTG	chr6	165611331	165611354	chr6	165612963	165612986
pgrna655	unknown2372	Neutral	GATCTCCATGACATTTAAGA	AATGTGTGACCAATTAAAGT	chr6	165611016	165611039	chr6	165612902	165612925
pgrna656	unknown2372	Neutral	GTTCTCCTCTCATTCCAAAA	GTTCAGGCCGAAGAATCCTG	chr6	165611268	165611291	chr6	165612963	165612986
pgrna657	unknown2372	Neutral	GATCTCCATGACATTTAAGA	GTTCAGGCCGAAGAATCCTG	chr6	165611016	165611039	chr6	165612963	165612986
pgrna658	unknown2372	Neutral	GTCTTCAAGCTAGAATGTGG	GTTCAGGCCGAAGAATCCTG	chr6	165611147	165611170	chr6	165612963	165612986
pgrna659	unknown2372	Neutral	CTAACAGTCACAAAATTACC	GTGAAAGTGAGAAAGGATGG	chr6	165611331	165611354	chr6	165613059	165613082
pgrna660	unknown2372	Neutral	GTTCTCCTCTCATTCCAAAA	AATGTGTGACCAATTAAAGT	chr6	165611268	165611291	chr6	165612902	165612925
pgrna661	unknown2372	Neutral	CTAACAGTCACAAAATTACC	GCATTAGCTGCATGTCCAGC	chr6	165611331	165611354	chr6	165612928	165612951
pgrna662	unknown2372	Neutral	GTTCTCCTCTCATTCCAAAA	GTGAAAGTGAGAAAGGATGG	chr6	165611268	165611291	chr6	165613059	165613082
pgrna663	unknown2372	Neutral	AGTATCCATTTTGGAATGAG	GTTCAGGCCGAAGAATCCTG	chr6	165611273	165611296	chr6	165612963	165612986
pgrna664	unknown2374	Neutral	CCAGGCCACATACTTGTGCA	GATGTCTGTGGGTTGCCGAG	chr6	168537885	168537908	chr6	168539357	168539380
pgrna665	unknown2374	Neutral	CCAGGCCACATACTTGTGCA	GGTGACCTCTCACTGGTTGG	chr6	168537885	168537908	chr6	168539615	168539638
pgrna666	unknown2374	Neutral	GACAGCCTAGGTGTATAGAG	GATGTCTGTGGGTTGCCGAG	chr6	168537844	168537867	chr6	168539357	168539380
pgrna667	unknown2374	Neutral	GACAGCCTAGGTGTATAGAG	CCTGACAGCACCTAACCTAG	chr6	168537844	168537867	chr6	168539493	168539516
pgrna668	unknown2374	Neutral	GACAGCCTAGGTGTATAGAG	AGTGAACCTCCTCCTAAGGA	chr6	168537844	168537867	chr6	168539438	168539461
pgrna669	unknown2374	Neutral	AAGGGCATAGAACTACAGTT	GATGTCTGTGGGTTGCCGAG	chr6	168537448	168537471	chr6	168539357	168539380
pgrna670	unknown2374	Neutral	GACAGCCTAGGTGTATAGAG	TGAGAGGTCACCCTTCCTAC	chr6	168537844	168537867	chr6	168539626	168539649
pgrna671	unknown2374	Neutral	GACAGCCTAGGTGTATAGAG	TTTCACGTTAATGCACCTGA	chr6	168537844	168537867	chr6	168539722	168539745
pgrna672	unknown2374	Neutral	TCTGATGTCACGTGACGGGA	GATGTCTGTGGGTTGCCGAG	chr6	168537481	168537504	chr6	168539357	168539380
pgrna673	unknown2374	Neutral	ACAGCCTAGGTGTATAGAGG	GATGTCTGTGGGTTGCCGAG	chr6	168537843	168537866	chr6	168539357	168539380
pgrna674	unknown2375	Neutral	GATGCTTATCCTCCTCTGAA	CCTCCTCGCCCATTGATATG	chr6	169242386	169242409	chr6	169244138	169244161
pgrna675	unknown2375	Neutral	GCTAAGCATCCTCCAATACC	ACCCTAATGGATTCACTCAA	chr6	169242436	169242459	chr6	169244210	169244233
pgrna676	unknown2375	Neutral	GATGCTTATCCTCCTCTGAA	ACCCTAATGGATTCACTCAA	chr6	169242386	169242409	chr6	169244210	169244233
pgrna677	unknown2375	Neutral	GCAGGAGTGATGTGGAGGAG	CCTCCTCGCCCATTGATATG	chr6	169242222	169242245	chr6	169244138	169244161
pgrna678	unknown2375	Neutral	GCAGGAGTGATGTGGAGGAG	ACCCTAATGGATTCACTCAA	chr6	169242222	169242245	chr6	169244210	169244233
pgrna679	unknown2375	Neutral	GATGCTTATCCTCCTCTGAA	CGCCATTTGCAACCTCGCAG	chr6	169242386	169242409	chr6	169243994	169244017
pgrna680	unknown2375	Neutral	GATGCTTATCCTCCTCTGAA	ATTTTAGTATTGGGATTTGG	chr6	169242386	169242409	chr6	169244166	169244189
pgrna681	unknown2375	Neutral	GCTAAGCATCCTCCAATACC	CCTCCTCGCCCATTGATATG	chr6	169242436	169242459	chr6	169244138	169244161
pgrna682	unknown2375	Neutral	GATGCTTATCCTCCTCTGAA	GTGTGTTCGTAATACCCTAA	chr6	169242386	169242409	chr6	169244223	169244246
pgrna683	unknown2375	Neutral	TCACTGCCCATCGATTTGGA	GTGTGTTCGTAATACCCTAA	chr6	169242275	169242298	chr6	169244223	169244246
pgrna684	unknown2376	Neutral	CTAGCACTGAGTTTGCAGAG	GCCGGGTTCTGCGTACACAT	chr6	170342153	170342176	chr6	170343902	170343925
pgrna685	unknown2376	Neutral	GTTTCTACGTGCCTGGAGGG	GAAGTGGCCTTGACTCCAAG	chr6	170341898	170341921	chr6	170344109	170344132
pgrna686	unknown2376	Neutral	CTAGCACTGAGTTTGCAGAG	GAAGTGGCCTTGACTCCAAG	chr6	170342153	170342176	chr6	170344109	170344132
pgrna687	unknown2376	Neutral	CTAGCACTGAGTTTGCAGAG	GTTCTGCGTACACATGGGCA	chr6	170342153	170342176	chr6	170343907	170343930
pgrna688	unknown2376	Neutral	CTAGCACTGAGTTTGCAGAG	GGCTTGCTCCAAAGTCCCCT	chr6	170342153	170342176	chr6	170344124	170344147
pgrna689	unknown2376	Neutral	CTAGCACTGAGTTTGCAGAG	GGGGTTTGTCCGCCAGAGAA	chr6	170342153	170342176	chr6	170344171	170344194
pgrna690	unknown2376	Neutral	GGGATGGAAGACGTGATCGT	GCCGGGTTCTGCGTACACAT	chr6	170342079	170342102	chr6	170343902	170343925
pgrna691	unknown2376	Neutral	GGGATGGAAGACGTGATCGT	GAAGTGGCCTTGACTCCAAG	chr6	170342079	170342102	chr6	170344109	170344132
pgrna692	unknown2376	Neutral	GGGATGGAAGACGTGATCGT	GTTCTGCGTACACATGGGCA	chr6	170342079	170342102	chr6	170343907	170343930
pgrna693	unknown2376	Neutral	GTTTCTACGTGCCTGGAGGG	GCCGGGTTCTGCGTACACAT	chr6	170341898	170341921	chr6	170343902	170343925
pgrna694	unknown2377	Neutral	GGGAAATCTGAAGTGAGCCC	GATGCCTCGTGATAACCCCA	chr7	1387529	1387552	chr7	1389376	1389399
pgrna695	unknown2377	Neutral	GGGAAATCTGAAGTGAGCCC	TTAAAATCTCCCAAACCAGC	chr7	1387529	1387552	chr7	1389641	1389664
pgrna696	unknown2377	Neutral	GCTGAGTGCCTGGATAACTA	GATGCCTCGTGATAACCCCA	chr7	1387337	1387360	chr7	1389376	1389399
pgrna697	unknown2377	Neutral	ATGGACCCCGTCATACACAG	GATGCCTCGTGATAACCCCA	chr7	1387359	1387382	chr7	1389376	1389399
pgrna698	unknown2377	Neutral	GGGAAATCTGAAGTGAGCCC	GATGCCACGCACAGACCACC	chr7	1387529	1387552	chr7	1389268	1389291
pgrna699	unknown2377	Neutral	GCTGAGTGCCTGGATAACTA	GATGCCACGCACAGACCACC	chr7	1387337	1387360	chr7	1389268	1389291
pgrna700	unknown2377	Neutral	GTGCCTGGATAACTAGGGAG	GATGCCTCGTGATAACCCCA	chr7	1387332	1387355	chr7	1389376	1389399
pgrna701	unknown2377	Neutral	ATGGACCCCGTCATACACAG	GATGCCACGCACAGACCACC	chr7	1387359	1387382	chr7	1389268	1389291
pgrna702	unknown2377	Neutral	GCAGCCCTGCCTGCACGCGG	GATGCCTCGTGATAACCCCA	chr7	1387779	1387802	chr7	1389376	1389399
pgrna703	unknown2377	Neutral	GTGCCTGGATAACTAGGGAG	GATGCCACGCACAGACCACC	chr7	1387332	1387355	chr7	1389268	1389291
pgrna704	unknown2578	Neutral	GCTTTCTGCAGATAAGGCGA	ATAGCAGGTACGAGATCCTG	chr8	41003892	41003915	chr8	41005891	41005914
pgrna705	unknown2578	Neutral	AGTAAAGATCGGCCACAACG	GTAAAGATAAAGACGTAGAC	chr8	41004140	41004163	chr8	41005778	41005801
pgrna706	unknown2578	Neutral	GCTTTCTGCAGATAAGGCGA	GAATTTAACTAAGCAAAACG	chr8	41003892	41003915	chr8	41005942	41005965
pgrna707	unknown2578	Neutral	GCTTTCTGCAGATAAGGCGA	AGACAGGGATTGACCATAAA	chr8	41003892	41003915	chr8	41005762	41005785
pgrna708	unknown2578	Neutral	GACAAGACAGCAATACCAGG	ATAGCAGGTACGAGATCCTG	chr8	41004027	41004050	chr8	41005891	41005914
pgrna709	unknown2578	Neutral	AGTAAAGATCGGCCACAACG	GAATTTAACTAAGCAAAACG	chr8	41004140	41004163	chr8	41005942	41005965
pgrna710	unknown2578	Neutral	GCTTTCTGCAGATAAGGCGA	GTAAAGATAAAGACGTAGAC	chr8	41003892	41003915	chr8	41005778	41005801
pgrna711	unknown2578	Neutral	GCTTTCTGCAGATAAGGCGA	GTGATTGTAACAATTGACTG	chr8	41003892	41003915	chr8	41006112	41006135
pgrna712	unknown2578	Neutral	GACAAGACAGCAATACCAGG	GAATTTAACTAAGCAAAACG	chr8	41004027	41004050	chr8	41005942	41005965
pgrna713	unknown2578	Neutral	GACAAGACAGCAATACCAGG	AGACAGGGATTGACCATAAA	chr8	41004027	41004050	chr8	41005762	41005785
pgrna714	unknown2590	Neutral	TGTGCTCGTACACTTTCCAA	GTACCCTTGAAACAGTGCTC	chr8	50558760	50558783	chr8	50560876	50560899
pgrna715	unknown2590	Neutral	GGTGATTTCAGGAAAAAACA	GGTGTGCTAGTTCCTAATGT	chr8	50558954	50558977	chr8	50560578	50560601
pgrna716	unknown2590	Neutral	GGTGATTTCAGGAAAAAACA	TACAATTCTGTGAAACACAG	chr8	50558954	50558977	chr8	50560971	50560994
pgrna717	unknown2590	Neutral	TGTGCTCGTACACTTTCCAA	GGTGTGCTAGTTCCTAATGT	chr8	50558760	50558783	chr8	50560578	50560601
pgrna718	unknown2590	Neutral	TGTGCTCGTACACTTTCCAA	GTGCTTCTACTGATTGCCTC	chr8	50558760	50558783	chr8	50560599	50560622
pgrna719	unknown2590	Neutral	GGTGATTTCAGGAAAAAACA	TTAGCATCCTGCTAAGATAA	chr8	50558954	50558977	chr8	50560846	50560869
pgrna720	unknown2590	Neutral	GTACACTTTCCAAGGGAACT	TACAATTCTGTGAAACACAG	chr8	50558767	50558790	chr8	50560971	50560994
pgrna721	unknown2590	Neutral	GGTGATTTCAGGAAAAAACA	GTACCCTTGAAACAGTGCTC	chr8	50558954	50558977	chr8	50560876	50560899
pgrna722	unknown2590	Neutral	GGAAAGTGTACGAGCACAGT	TACAATTCTGTGAAACACAG	chr8	50558755	50558778	chr8	50560971	50560994
pgrna723	unknown2590	Neutral	GTACACTTTCCAAGGGAACT	TTAGCATCCTGCTAAGATAA	chr8	50558767	50558790	chr8	50560846	50560869
pgrna724	unknown2593	Neutral	GCTAGGATATGAGATGCCTA	GCTCTTAACTCCCCTTAACT	chr8	53753555	53753578	chr8	53755551	53755574
pgrna725	unknown2593	Neutral	GGCAGAGTGAGCAAAGCCGT	TTGAGTGCCTTAAGACAGCA	chr8	53753571	53753594	chr8	53755453	53755476
pgrna726	unknown2593	Neutral	GCTAGGATATGAGATGCCTA	TTGAGTGCCTTAAGACAGCA	chr8	53753555	53753578	chr8	53755453	53755476
pgrna727	unknown2593	Neutral	GCTAGGATATGAGATGCCTA	AAGCACTTTACCGAGTTAAG	chr8	53753555	53753578	chr8	53755561	53755584
pgrna728	unknown2593	Neutral	TCATATCCTAGCGATTTCAA	GCTCTTAACTCCCCTTAACT	chr8	53753544	53753567	chr8	53755551	53755574
pgrna729	unknown2593	Neutral	TTTATGCCCTTGAAATCGCT	GCTCTTAACTCCCCTTAACT	chr8	53753538	53753561	chr8	53755551	53755574
pgrna730	unknown2593	Neutral	GCTGGCTGAAGAAAGTGGTG	GCTCTTAACTCCCCTTAACT	chr8	53753879	53753902	chr8	53755551	53755574
pgrna731	unknown2593	Neutral	GCTGGCTGAAGAAAGTGGTG	TTGAGTGCCTTAAGACAGCA	chr8	53753879	53753902	chr8	53755453	53755476
pgrna732	unknown2593	Neutral	TTTCTCATGAGGATTTAACA	GCTCTTAACTCCCCTTAACT	chr8	53753841	53753864	chr8	53755551	53755574
pgrna733	unknown2593	Neutral	GCTGGCTGAAGAAAGTGGTG	AAGCACTTTACCGAGTTAAG	chr8	53753879	53753902	chr8	53755561	53755584
pgrna734	unknown2620	Neutral	GCTGACACAGTAACTTCAAG	ATATACGCTGTGATAGCAGG	chr8	67219754	67219777	chr8	67221428	67221451
pgrna735	unknown2620	Neutral	GTGCACCATTCCCTACTCAT	ATGGAAGAGTAAGTAAGCTA	chr8	67219705	67219728	chr8	67221774	67221797
pgrna736	unknown2620	Neutral	GTGCACCATTCCCTACTCAT	ATATACGCTGTGATAGCAGG	chr8	67219705	67219728	chr8	67221428	67221451
pgrna737	unknown2620	Neutral	GCTGACACAGTAACTTCAAG	TGCTGGGAAAGCTTATAAGA	chr8	67219754	67219777	chr8	67221458	67221481
pgrna738	unknown2620	Neutral	GCTGACACAGTAACTTCAAG	CGGTACCCAAGAAAATCTTG	chr8	67219754	67219777	chr8	67221478	67221501
pgrna739	unknown2620	Neutral	GCTGACACAGTAACTTCAAG	ATGGAAGAGTAAGTAAGCTA	chr8	67219754	67219777	chr8	67221774	67221797
pgrna740	unknown2620	Neutral	GCTGACACAGTAACTTCAAG	CACAATTCCCCAAATACCCC	chr8	67219754	67219777	chr8	67221601	67221624
pgrna741	unknown2620	Neutral	GTGTTCCAATGAGTAGGGAA	ATATACGCTGTGATAGCAGG	chr8	67219700	67219723	chr8	67221428	67221451
pgrna742	unknown2620	Neutral	GTGCACCATTCCCTACTCAT	TGCTGGGAAAGCTTATAAGA	chr8	67219705	67219728	chr8	67221458	67221481
pgrna743	unknown2620	Neutral	GTGCACCATTCCCTACTCAT	CGGTACCCAAGAAAATCTTG	chr8	67219705	67219728	chr8	67221478	67221501
pgrna744	unknown264	Neutral	TTCATTCACAGGACACCCAA	GGTCTCCTGAGGCATCCTGA	chr10	50449448	50449471	chr10	50451241	50451264
pgrna745	unknown264	Neutral	GTAGCCCTGGATGCCTGATA	GGTCTCCTGAGGCATCCTGA	chr10	50449359	50449382	chr10	50451241	50451264
pgrna746	unknown264	Neutral	TTCATTCACAGGACACCCAA	GAGACAAACGAGTAAACCAG	chr10	50449448	50449471	chr10	50451293	50451316
pgrna747	unknown264	Neutral	AGCACCCTATCAGGCATCCA	GGTCTCCTGAGGCATCCTGA	chr10	50449355	50449378	chr10	50451241	50451264
pgrna748	unknown264	Neutral	GATGAGTTGAGATCCAACAT	GGTCTCCTGAGGCATCCTGA	chr10	50449498	50449521	chr10	50451241	50451264
pgrna749	unknown264	Neutral	AGCACCCTATCAGGCATCCA	GAGACAAACGAGTAAACCAG	chr10	50449355	50449378	chr10	50451293	50451316
pgrna750	unknown264	Neutral	GATGAGTTGAGATCCAACAT	GAGACAAACGAGTAAACCAG	chr10	50449498	50449521	chr10	50451293	50451316
pgrna751	unknown264	Neutral	AGAGAGAACATAGCATCCAA	GGTCTCCTGAGGCATCCTGA	chr10	50449236	50449259	chr10	50451241	50451264
pgrna752	unknown264	Neutral	GATGAGTTGAGATCCAACAT	TTTCTTCCACACTCCTTGCA	chr10	50449498	50449521	chr10	50451480	50451503
pgrna753	unknown264	Neutral	AGAGAGAACATAGCATCCAA	GAGACAAACGAGTAAACCAG	chr10	50449236	50449259	chr10	50451293	50451316
pgrna754	unknown265	Neutral	GTAATTGTCTCCACTGCTGG	TTAATAGGAGGCATTAGCCA	chr10	54672066	54672089	chr10	54673794	54673817
pgrna755	unknown265	Neutral	GACCACCACAAATCCATGGA	TCCTAGTCTACATTCCACTA	chr10	54671861	54671884	chr10	54673907	54673930
pgrna756	unknown265	Neutral	GTAATTGTCTCCACTGCTGG	GTACATCCAAAAATATAACA	chr10	54672066	54672089	chr10	54673737	54673760
pgrna757	unknown265	Neutral	GACCACCACAAATCCATGGA	TTAATAGGAGGCATTAGCCA	chr10	54671861	54671884	chr10	54673794	54673817
pgrna758	unknown265	Neutral	GTAATTGTCTCCACTGCTGG	ATTGGCTGTTGGCTTCAGAA	chr10	54672066	54672089	chr10	54673763	54673786
pgrna759	unknown265	Neutral	GACCACCACAAATCCATGGA	GTACATCCAAAAATATAACA	chr10	54671861	54671884	chr10	54673737	54673760
pgrna760	unknown265	Neutral	GTAATTGTCTCCACTGCTGG	TCCTAGTCTACATTCCACTA	chr10	54672066	54672089	chr10	54673907	54673930
pgrna761	unknown265	Neutral	CCAAGTTCCAGCACCCTCCA	GTACATCCAAAAATATAACA	chr10	54671874	54671897	chr10	54673737	54673760
pgrna762	unknown265	Neutral	AGGGAAAAGTGACTTAATCG	GTACATCCAAAAATATAACA	chr10	54671922	54671945	chr10	54673737	54673760
pgrna763	unknown265	Neutral	GACCACCACAAATCCATGGA	ATTGGCTGTTGGCTTCAGAA	chr10	54671861	54671884	chr10	54673763	54673786
pgrna764	unknown271	Neutral	GCCCACACAACTACTCTGAT	TTGCATGGCAGCTCACTCAA	chr10	58709018	58709041	chr10	58710977	58711000
pgrna765	unknown271	Neutral	GCCCACACAACTACTCTGAT	ATCGTGCCTAAGAAATAACT	chr10	58709018	58709041	chr10	58711011	58711034
pgrna766	unknown271	Neutral	GATTCCAGACCCTACATTCA	TTGCATGGCAGCTCACTCAA	chr10	58709178	58709201	chr10	58710977	58711000
pgrna767	unknown271	Neutral	AACTATCCAAGCCAAATGGG	GAAAATCTATCTGTGAGTAG	chr10	58709090	58709113	chr10	58711188	58711211
pgrna768	unknown271	Neutral	GCCCACACAACTACTCTGAT	GAAAATCTATCTGTGAGTAG	chr10	58709018	58709041	chr10	58711188	58711211
pgrna769	unknown271	Neutral	GCCCACACAACTACTCTGAT	AGTTATTTCTTAGGCACGAT	chr10	58709018	58709041	chr10	58711014	58711037
pgrna770	unknown271	Neutral	TCTACTGAAGCAATGACAAG	GAAAATCTATCTGTGAGTAG	chr10	58708841	58708864	chr10	58711188	58711211
pgrna771	unknown271	Neutral	GATTCCAGACCCTACATTCA	GAAAATCTATCTGTGAGTAG	chr10	58709178	58709201	chr10	58711188	58711211
pgrna772	unknown271	Neutral	GATTCCAGACCCTACATTCA	AGTTATTTCTTAGGCACGAT	chr10	58709178	58709201	chr10	58711014	58711037
pgrna773	unknown271	Neutral	TGTCAGCCAGGAGGAACCAC	GAAAATCTATCTGTGAGTAG	chr10	58708982	58709005	chr10	58711188	58711211
pgrna774	unknown273	Neutral	AGAAGAAACCTCACAGTTGA	GAGTGACAAATCACTCTACA	chr10	59493373	59493396	chr10	59495032	59495055
pgrna775	unknown273	Neutral	GGGATTTTGTAAGGTTACTG	GCATTACCTACATAATATGT	chr10	59493033	59493056	chr10	59495287	59495310
pgrna776	unknown273	Neutral	AGGTGGAATGAATTTATAGA	GAGTGACAAATCACTCTACA	chr10	59493275	59493298	chr10	59495032	59495055
pgrna777	unknown273	Neutral	AACCACATCCCTCAACTGTG	GAGTGACAAATCACTCTACA	chr10	59493365	59493388	chr10	59495032	59495055
pgrna778	unknown273	Neutral	AAGTAGGGTTAAAGGGGACG	GAGTGACAAATCACTCTACA	chr10	59493166	59493189	chr10	59495032	59495055
pgrna779	unknown273	Neutral	GGGATTTTGTAAGGTTACTG	GAGTGACAAATCACTCTACA	chr10	59493033	59493056	chr10	59495032	59495055
pgrna780	unknown273	Neutral	AGAAGAAACCTCACAGTTGA	GCATTACCTACATAATATGT	chr10	59493373	59493396	chr10	59495287	59495310
pgrna781	unknown273	Neutral	AGGTGGAATGAATTTATAGA	GCATTACCTACATAATATGT	chr10	59493275	59493298	chr10	59495287	59495310
pgrna782	unknown273	Neutral	AACCACATCCCTCAACTGTG	GCATTACCTACATAATATGT	chr10	59493365	59493388	chr10	59495287	59495310
pgrna783	unknown273	Neutral	AAGTAGGGTTAAAGGGGACG	GCATTACCTACATAATATGT	chr10	59493166	59493189	chr10	59495287	59495310
pgrna784	unknown274	Neutral	GAGCCACATTCAACTTCCAG	AGTAGCCTTGGACTTCCTGT	chr10	59803523	59803546	chr10	59805241	59805264
pgrna785	unknown274	Neutral	GTAGGTCAGAACAATATGGC	AGGATGTGGTAAGATCCCAC	chr10	59803349	59803372	chr10	59805256	59805279
pgrna786	unknown274	Neutral	GAGCCACATTCAACTTCCAG	TCTTGGTTCATCTTCGCCAA	chr10	59803523	59803546	chr10	59805471	59805494
pgrna787	unknown274	Neutral	GTAGGTCAGAACAATATGGC	AGTAGCCTTGGACTTCCTGT	chr10	59803349	59803372	chr10	59805241	59805264
pgrna788	unknown274	Neutral	GAGCCACATTCAACTTCCAG	CTTTTCATATGAATAGGCTT	chr10	59803523	59803546	chr10	59805539	59805562
pgrna789	unknown274	Neutral	GTAGGTCAGAACAATATGGC	TCTTGGTTCATCTTCGCCAA	chr10	59803349	59803372	chr10	59805471	59805494
pgrna790	unknown274	Neutral	GAGCCACATTCAACTTCCAG	AGGATGTGGTAAGATCCCAC	chr10	59803523	59803546	chr10	59805256	59805279
pgrna791	unknown274	Neutral	GTAGGTCAGAACAATATGGC	CTTTTCATATGAATAGGCTT	chr10	59803349	59803372	chr10	59805539	59805562
pgrna792	unknown274	Neutral	GAGCCACATTCAACTTCCAG	AAAGTAAGCCCCCAACACCC	chr10	59803523	59803546	chr10	59805380	59805403
pgrna793	unknown274	Neutral	GGTCATATGAAGAGGGCCAT	AGTAGCCTTGGACTTCCTGT	chr10	59803549	59803572	chr10	59805241	59805264
pgrna794	unknown275	Neutral	GCCCTCACTGAAATTCCCAA	TGAGTAGGTACAGAATTTAG	chr10	60214922	60214945	chr10	60217073	60217096
pgrna795	unknown275	Neutral	GTAAATCACAGGCCAGCTAT	ATGGTTAGCCTGAAGAGCTT	chr10	60215083	60215106	chr10	60217038	60217061
pgrna796	unknown275	Neutral	GATTCAGCTTGGGTAGAGAA	TGAGTAGGTACAGAATTTAG	chr10	60214781	60214804	chr10	60217073	60217096
pgrna797	unknown275	Neutral	GCCCTCACTGAAATTCCCAA	ATGGTTAGCCTGAAGAGCTT	chr10	60214922	60214945	chr10	60217038	60217061
pgrna798	unknown275	Neutral	GCAAGATCCACCCTACTCCA	TGAGTAGGTACAGAATTTAG	chr10	60215013	60215036	chr10	60217073	60217096
pgrna799	unknown275	Neutral	GATTCAGCTTGGGTAGAGAA	ATGGTTAGCCTGAAGAGCTT	chr10	60214781	60214804	chr10	60217038	60217061
pgrna800	unknown275	Neutral	GGTCAGTTATCTGCAATCTG	TGAGTAGGTACAGAATTTAG	chr10	60214893	60214916	chr10	60217073	60217096
pgrna801	unknown275	Neutral	GCAAGATCCACCCTACTCCA	ATGGTTAGCCTGAAGAGCTT	chr10	60215013	60215036	chr10	60217038	60217061
pgrna802	unknown275	Neutral	GTAAATCACAGGCCAGCTAT	TGAGTAGGTACAGAATTTAG	chr10	60215083	60215106	chr10	60217073	60217096
pgrna803	unknown275	Neutral	GGTCAGTTATCTGCAATCTG	ATGGTTAGCCTGAAGAGCTT	chr10	60214893	60214916	chr10	60217038	60217061
pgrna804	unknown276	Neutral	ATACAATTCCTCGAAGCGCA	GCCTGGTCACAGATGCATGA	chr10	60693405	60693428	chr10	60695221	60695244
pgrna805	unknown276	Neutral	CGATAGGTAGAGAAGTGGGG	GTTGTTCCTCATGGGTCCAC	chr10	60693367	60693390	chr10	60695298	60695321
pgrna806	unknown276	Neutral	CGATAGGTAGAGAAGTGGGG	GCCTGGTCACAGATGCATGA	chr10	60693367	60693390	chr10	60695221	60695244
pgrna807	unknown276	Neutral	GGAGAATGTGCAATTGTCCA	GCCTGGTCACAGATGCATGA	chr10	60693558	60693581	chr10	60695221	60695244
pgrna808	unknown276	Neutral	CTATGTACTGGTCCTCCACT	GCCTGGTCACAGATGCATGA	chr10	60693458	60693481	chr10	60695221	60695244
pgrna809	unknown276	Neutral	CCATCTAGCATCCTACCCCA	GCCTGGTCACAGATGCATGA	chr10	60693516	60693539	chr10	60695221	60695244
pgrna810	unknown276	Neutral	ATACAATTCCTCGAAGCGCA	GCCCATACTCAAGAATGTGG	chr10	60693405	60693428	chr10	60694988	60695011
pgrna811	unknown276	Neutral	ATACAATTCCTCGAAGCGCA	GTTGTTCCTCATGGGTCCAC	chr10	60693405	60693428	chr10	60695298	60695321
pgrna812	unknown276	Neutral	ATACAATTCCTCGAAGCGCA	GCTGGGTTGACCTGATAGCA	chr10	60693405	60693428	chr10	60695136	60695159
pgrna813	unknown276	Neutral	CGATAGGTAGAGAAGTGGGG	GCCCATACTCAAGAATGTGG	chr10	60693367	60693390	chr10	60694988	60695011
pgrna814	unknown278	Neutral	CCATTGATACAAATAGACAC	GAGCCTATAAATAGTACCAA	chr10	62975448	62975471	chr10	62977201	62977224
pgrna815	unknown278	Neutral	GCATGCCCAGCTATATGAAG	AACTGGCTAAGATTTTAGTT	chr10	62975528	62975551	chr10	62977278	62977301
pgrna816	unknown278	Neutral	ATGAAATTCAAGTATCACAG	GAGCCTATAAATAGTACCAA	chr10	62975333	62975356	chr10	62977201	62977224
pgrna817	unknown278	Neutral	GCATGCCCAGCTATATGAAG	GAGCCTATAAATAGTACCAA	chr10	62975528	62975551	chr10	62977201	62977224
pgrna818	unknown278	Neutral	GCACCTCATCCTGTATCAGT	GAGCCTATAAATAGTACCAA	chr10	62975486	62975509	chr10	62977201	62977224
pgrna819	unknown278	Neutral	GTAGAGCAGTGGCTGAAGCC	GAGCCTATAAATAGTACCAA	chr10	62975123	62975146	chr10	62977201	62977224
pgrna820	unknown278	Neutral	GCATGCCCAGCTATATGAAG	TTGGTTCCCAAATAGTGTGG	chr10	62975528	62975551	chr10	62977050	62977073
pgrna821	unknown278	Neutral	GCATGCCCAGCTATATGAAG	AGAGCCTATAAATAGTACCA	chr10	62975528	62975551	chr10	62977202	62977225
pgrna822	unknown278	Neutral	GCACCTCATCCTGTATCAGT	TTGGTTCCCAAATAGTGTGG	chr10	62975486	62975509	chr10	62977050	62977073
pgrna823	unknown278	Neutral	GTAGAGCAGTGGCTGAAGCC	TTGGTTCCCAAATAGTGTGG	chr10	62975123	62975146	chr10	62977050	62977073
pgrna824	unknown2804	Neutral	GGTCTCTATTTGAGACCCCG	TCATTGAGCTATAAAACCAA	chr9	72589094	72589117	chr9	72590548	72590571
pgrna825	unknown2804	Neutral	GGTGTGTCGGAGGTCGGCGG	TCATTGAGCTATAAAACCAA	chr9	72588817	72588840	chr9	72590548	72590571
pgrna826	unknown2804	Neutral	GGTCTCTATTTGAGACCCCG	GTTCCCCTAAACTAAGTCAG	chr9	72589094	72589117	chr9	72590893	72590916
pgrna827	unknown2804	Neutral	GGTCTCTATTTGAGACCCCG	ATAAAACCAAGGGTTCCCTT	chr9	72589094	72589117	chr9	72590538	72590561
pgrna828	unknown2804	Neutral	GGTCTCTATTTGAGACCCCG	TTTAGATGAAGTCGACACCA	chr9	72589094	72589117	chr9	72590614	72590637
pgrna829	unknown2804	Neutral	GGTCTCTATTTGAGACCCCG	CCAAAGGAAGGCCGGCCAAA	chr9	72589094	72589117	chr9	72590523	72590546
pgrna830	unknown2804	Neutral	CTTCAGGACTTATAGTCCCA	GTTCCCCTAAACTAAGTCAG	chr9	72588681	72588704	chr9	72590893	72590916
pgrna831	unknown2804	Neutral	AATGGACAGAGAAGTGCGAG	GTTCCCCTAAACTAAGTCAG	chr9	72588729	72588752	chr9	72590893	72590916
pgrna832	unknown2804	Neutral	ACAGAGAAGTGCGAGAGGCA	GTTCCCCTAAACTAAGTCAG	chr9	72588734	72588757	chr9	72590893	72590916
pgrna833	unknown2804	Neutral	GAGAGACTTCTACTCTAGTG	TCATTGAGCTATAAAACCAA	chr9	72588773	72588796	chr9	72590548	72590571
pgrna834	unknown2805	Neutral	TATGCTGCACGTTAACGCAG	GTTTGTCTCGGGAGGCCTGG	chr9	73085805	73085828	chr9	73087492	73087515
pgrna835	unknown2805	Neutral	TCCCAAACCTTCCTGCAAGG	GTGCACAGCACAAAGTAATG	chr9	73085866	73085889	chr9	73087794	73087817
pgrna836	unknown2805	Neutral	TTAACGTGCAGCATAAATAG	GTTTGTCTCGGGAGGCCTGG	chr9	73085797	73085820	chr9	73087492	73087515
pgrna837	unknown2805	Neutral	TATGCTGCACGTTAACGCAG	GTGCACAGCACAAAGTAATG	chr9	73085805	73085828	chr9	73087794	73087817
pgrna838	unknown2805	Neutral	TTAACGTGCAGCATAAATAG	GTGCACAGCACAAAGTAATG	chr9	73085797	73085820	chr9	73087794	73087817
pgrna839	unknown2805	Neutral	TATGCTGCACGTTAACGCAG	GTATAGAGAGCAGAAGTGCC	chr9	73085805	73085828	chr9	73087886	73087909
pgrna840	unknown2805	Neutral	TCCCAAACCTTCCTGCAAGG	GTTTGTCTCGGGAGGCCTGG	chr9	73085866	73085889	chr9	73087492	73087515
pgrna841	unknown2805	Neutral	AGAGGCATCCAATCTAATGT	GTTTGTCTCGGGAGGCCTGG	chr9	73085823	73085846	chr9	73087492	73087515
pgrna842	unknown2805	Neutral	TTAACGTGCAGCATAAATAG	GTATAGAGAGCAGAAGTGCC	chr9	73085797	73085820	chr9	73087886	73087909
pgrna843	unknown2805	Neutral	TGCCTCCACCTACATTAGAT	GTTTGTCTCGGGAGGCCTGG	chr9	73085831	73085854	chr9	73087492	73087515
pgrna844	unknown288	Neutral	GCTGACTTAAGGCAGCCTCA	TGTACATGCCAGACTGCAGA	chr10	72842678	72842701	chr10	72844542	72844565
pgrna845	unknown288	Neutral	GCCTGCAGTCTACAGGCCTG	AAAGGTCAGTGACTCACCCG	chr10	72842657	72842680	chr10	72844977	72845000
pgrna846	unknown288	Neutral	GCTGACTTAAGGCAGCCTCA	AAAGGTCAGTGACTCACCCG	chr10	72842678	72842701	chr10	72844977	72845000
pgrna847	unknown288	Neutral	GCTGACTTAAGGCAGCCTCA	GAGTTTGAGTTGAGTCACAT	chr10	72842678	72842701	chr10	72844610	72844633
pgrna848	unknown288	Neutral	GCTGACTTAAGGCAGCCTCA	CACACAGTCGGAAGAGTTGG	chr10	72842678	72842701	chr10	72844567	72844590
pgrna849	unknown288	Neutral	GCTGACTTAAGGCAGCCTCA	CTGAATCCCTGGCAGAGCTA	chr10	72842678	72842701	chr10	72844729	72844752
pgrna850	unknown288	Neutral	AGGCACTTGTGCAGGCTGCA	GAGTTTGAGTTGAGTCACAT	chr10	72842891	72842914	chr10	72844610	72844633
pgrna851	unknown288	Neutral	ATTACGTGCTGTGGGTTCCA	GAGTTTGAGTTGAGTCACAT	chr10	72842797	72842820	chr10	72844610	72844633
pgrna852	unknown288	Neutral	GCCTGCAGTCTACAGGCCTG	TGTACATGCCAGACTGCAGA	chr10	72842657	72842680	chr10	72844542	72844565
pgrna853	unknown288	Neutral	GGCTGGAGAACCGGTGGCAG	TGTACATGCCAGACTGCAGA	chr10	72842870	72842893	chr10	72844542	72844565
pgrna854	unknown291	Neutral	GTATCCACAGTCTTGCACCT	GCAAGGCCAGAAGCAAACCG	chr10	80605619	80605642	chr10	80607676	80607699
pgrna855	unknown291	Neutral	GTATCCACAGTCTTGCACCT	TGTCCCGCCTATGTACATGT	chr10	80605619	80605642	chr10	80607479	80607502
pgrna856	unknown291	Neutral	ACCAGCCTCCACATTGGCCG	GCAAGGCCAGAAGCAAACCG	chr10	80605647	80605670	chr10	80607676	80607699
pgrna857	unknown291	Neutral	CGTGAGGTGCCTATGCTCCG	GCAAGGCCAGAAGCAAACCG	chr10	80606029	80606052	chr10	80607676	80607699
pgrna858	unknown291	Neutral	GTGTGAGGACCAGAGTCTGG	GCAAGGCCAGAAGCAAACCG	chr10	80605968	80605991	chr10	80607676	80607699
pgrna859	unknown291	Neutral	GTATCCACAGTCTTGCACCT	GTGCTGGCCTACATGTACAT	chr10	80605619	80605642	chr10	80607472	80607495
pgrna860	unknown291	Neutral	TCGTGCTCAGACTCCTGAGA	GCAAGGCCAGAAGCAAACCG	chr10	80605866	80605889	chr10	80607676	80607699
pgrna861	unknown291	Neutral	GTATCCACAGTCTTGCACCT	CAGTAGATACAATAGAAAAG	chr10	80605619	80605642	chr10	80607818	80607841
pgrna862	unknown291	Neutral	ACCAGCCTCCACATTGGCCG	GTGCTGGCCTACATGTACAT	chr10	80605647	80605670	chr10	80607472	80607495
pgrna863	unknown291	Neutral	CGTGAGGTGCCTATGCTCCG	GTGCTGGCCTACATGTACAT	chr10	80606029	80606052	chr10	80607472	80607495
pgrna864	unknown3099	Neutral	ATAGCGAGAGAGTCAAAGGC	GCATAAGTAATTTCTCGGAA	chrX	139936396	139936419	chrX	139938469	139938492
pgrna865	unknown3099	Neutral	TGCCTTTGACTCTCTCGCTA	GTTGCCCCACTGAATTTTGA	chrX	139936394	139936417	chrX	139938303	139938326
pgrna866	unknown3099	Neutral	ATAGCGAGAGAGTCAAAGGC	GTTGCCCCACTGAATTTTGA	chrX	139936396	139936419	chrX	139938303	139938326
pgrna867	unknown3099	Neutral	GCTATGGTGTTCCCAAAGCC	GCATAAGTAATTTCTCGGAA	chrX	139936378	139936401	chrX	139938469	139938492
pgrna868	unknown3099	Neutral	TGCCTTTGACTCTCTCGCTA	GCATAAGTAATTTCTCGGAA	chrX	139936394	139936417	chrX	139938469	139938492
pgrna869	unknown3099	Neutral	GCTATGGTGTTCCCAAAGCC	TTGCCCCACTGAATTTTGAT	chrX	139936378	139936401	chrX	139938302	139938325
pgrna870	unknown3099	Neutral	CACCATAGCGAGAGAGTCAA	GCATAAGTAATTTCTCGGAA	chrX	139936392	139936415	chrX	139938469	139938492
pgrna871	unknown3099	Neutral	GCTATGGTGTTCCCAAAGCC	AGCTGGACAAGGGAGTTAGG	chrX	139936378	139936401	chrX	139938643	139938666
pgrna872	unknown3099	Neutral	GCTATGGTGTTCCCAAAGCC	AACAATCTCAGCACAGACAA	chrX	139936378	139936401	chrX	139938237	139938260
pgrna873	unknown3099	Neutral	GCTATGGTGTTCCCAAAGCC	TCTGCCCATCAAAATTCAGT	chrX	139936378	139936401	chrX	139938298	139938321
pgrna874	unknown462	Neutral	GCTGCGTTGGGAGCGATGCC	TTATTGGGCTATTAGTTCCC	chr11	130476204	130476227	chr11	130477719	130477742
pgrna875	unknown462	Neutral	GGTCCTCTCTGCTCCAGAGA	GCAGTGAGCAGCTTCCTTAA	chr11	130476175	130476198	chr11	130477927	130477950
pgrna876	unknown462	Neutral	GGTCCTCTCTGCTCCAGAGA	GTCTTCTCACCCAAGACACC	chr11	130476175	130476198	chr11	130477784	130477807
pgrna877	unknown462	Neutral	GGTCCTCTCTGCTCCAGAGA	CTTGGGATGCTATCAAGAGT	chr11	130476175	130476198	chr11	130477892	130477915
pgrna878	unknown462	Neutral	GGTCCTCTCTGCTCCAGAGA	TTATTGGGCTATTAGTTCCC	chr11	130476175	130476198	chr11	130477719	130477742
pgrna879	unknown462	Neutral	GCTGCGTTGGGAGCGATGCC	GCAGTGAGCAGCTTCCTTAA	chr11	130476204	130476227	chr11	130477927	130477950
pgrna880	unknown462	Neutral	GCTGCGTTGGGAGCGATGCC	GTCTTCTCACCCAAGACACC	chr11	130476204	130476227	chr11	130477784	130477807
pgrna881	unknown462	Neutral	GCTGCGTTGGGAGCGATGCC	CTTGGGATGCTATCAAGAGT	chr11	130476204	130476227	chr11	130477892	130477915
pgrna882	unknown464	Neutral	GCTAGCAGATAAGCCCCACA	CAGAGCTTAGGAGCTTAGCG	chr11	133527241	133527264	chr11	133528905	133528928
pgrna883	unknown464	Neutral	GGGGCTTATCTGCTAGCGGG	ACTCCCACCTTGGGGTTGAG	chr11	133527235	133527258	chr11	133528783	133528806
pgrna884	unknown464	Neutral	GGGGCTTATCTGCTAGCGGG	CAGAGCTTAGGAGCTTAGCG	chr11	133527235	133527258	chr11	133528905	133528928
pgrna885	unknown464	Neutral	GCTAGCAGATAAGCCCCACA	GCATCGCATTTGAAGTCAGA	chr11	133527241	133527264	chr11	133529202	133529225
pgrna886	unknown464	Neutral	GCTAGCAGATAAGCCCCACA	GCTCATAGACTACTAACAAT	chr11	133527241	133527264	chr11	133529181	133529204
pgrna887	unknown464	Neutral	GCTAGCAGATAAGCCCCACA	ACTCCCACCTTGGGGTTGAG	chr11	133527241	133527264	chr11	133528783	133528806
pgrna888	unknown464	Neutral	GGGGCTTATCTGCTAGCGGG	GCATCGCATTTGAAGTCAGA	chr11	133527235	133527258	chr11	133529202	133529225
pgrna889	unknown464	Neutral	GCTAGCAGATAAGCCCCACA	TTGAGTGGATTCAGGTGCTG	chr11	133527241	133527264	chr11	133528872	133528895
pgrna890	unknown464	Neutral	TGTGGGGCTTATCTGCTAGC	GCATCGCATTTGAAGTCAGA	chr11	133527238	133527261	chr11	133529202	133529225
pgrna891	unknown464	Neutral	GGGGCTTATCTGCTAGCGGG	GCTCATAGACTACTAACAAT	chr11	133527235	133527258	chr11	133529181	133529204
pgrna892	unknown465	Neutral	GATGCCCTTGGCTTTCCACT	TTAAAGACTTGCCATCGCGC	chr11	134726376	134726399	chr11	134727936	134727959
pgrna893	unknown465	Neutral	GATGCCCTTGGCTTTCCACT	GTGTCATTCTGCACCAGATG	chr11	134726376	134726399	chr11	134727872	134727895
pgrna894	unknown465	Neutral	GATGCCCTTGGCTTTCCACT	ATTAAAGACTTGCCATCGCG	chr11	134726376	134726399	chr11	134727937	134727960
pgrna895	unknown465	Neutral	GATGCCCTTGGCTTTCCACT	GGTCTGGCTGGCTTAAGTTT	chr11	134726376	134726399	chr11	134728106	134728129
pgrna896	unknown465	Neutral	CAAAGTACAGTGGAGCCAAG	GGTCTGGCTGGCTTAAGTTT	chr11	134726166	134726189	chr11	134728106	134728129
pgrna897	unknown465	Neutral	GTGGAAAGCCAAGGGCATCA	TTAAAGACTTGCCATCGCGC	chr11	134726380	134726403	chr11	134727936	134727959
pgrna898	unknown465	Neutral	GATGCCCTTGGCTTTCCACT	TGATGAGTGCCACCTTCCAT	chr11	134726376	134726399	chr11	134727959	134727982
pgrna899	unknown465	Neutral	GTGGAAAGCCAAGGGCATCA	ATTAAAGACTTGCCATCGCG	chr11	134726380	134726403	chr11	134727937	134727960
pgrna900	unknown465	Neutral	CCTACAGGATAATATGGAAG	GGTCTGGCTGGCTTAAGTTT	chr11	134726020	134726043	chr11	134728106	134728129
pgrna901	unknown465	Neutral	AGATAATCCCTACACATGGG	GGTCTGGCTGGCTTAAGTTT	chr11	134726057	134726080	chr11	134728106	134728129
pgrna902	unknown466	Neutral	GGAAAGTCTGGAAAGAAGCG	CTACTGGCTATACAACTGAT	chr12	4073669	4073692	chr12	4075535	4075558
pgrna903	unknown466	Neutral	TGGTCAAAATGGCGCCCAAG	GCCCGGGAGTCAGTGAAGAC	chr12	4073749	4073772	chr12	4075898	4075921
pgrna904	unknown466	Neutral	GGAAAGTCTGGAAAGAAGCG	AAGAATACCCGAGATGCCTG	chr12	4073669	4073692	chr12	4075726	4075749
pgrna905	unknown466	Neutral	GGAAAGTCTGGAAAGAAGCG	GCCCGGGAGTCAGTGAAGAC	chr12	4073669	4073692	chr12	4075898	4075921
pgrna906	unknown466	Neutral	GGAAAGTCTGGAAAGAAGCG	ATTTTGAGTTTGCTCTGCCC	chr12	4073669	4073692	chr12	4075914	4075937
pgrna907	unknown466	Neutral	GAGGTACTACGGGTGATCTA	CTACTGGCTATACAACTGAT	chr12	4073830	4073853	chr12	4075535	4075558
pgrna908	unknown466	Neutral	GCTGCAAATGATAGCTGTTG	CTACTGGCTATACAACTGAT	chr12	4073713	4073736	chr12	4075535	4075558
pgrna909	unknown466	Neutral	GAGGTACTACGGGTGATCTA	AAGAATACCCGAGATGCCTG	chr12	4073830	4073853	chr12	4075726	4075749
pgrna910	unknown466	Neutral	GCTGCAAATGATAGCTGTTG	AAGAATACCCGAGATGCCTG	chr12	4073713	4073736	chr12	4075726	4075749
pgrna911	unknown466	Neutral	GAGGTACTACGGGTGATCTA	GCCCGGGAGTCAGTGAAGAC	chr12	4073830	4073853	chr12	4075898	4075921
pgrna912	unknown475	Neutral	GTGCACAGTTAACTAAACAG	CCATGATTCAGTCATCAGTA	chr12	18047878	18047901	chr12	18049727	18049750
pgrna913	unknown475	Neutral	GCATCGCACCACAATTACCC	ACATTCTGGGAGTTATTGAA	chr12	18048106	18048129	chr12	18049662	18049685
pgrna914	unknown475	Neutral	GTGCACAGTTAACTAAACAG	CATACAATAATGTTTGTACA	chr12	18047878	18047901	chr12	18049619	18049642
pgrna915	unknown475	Neutral	GTGCACAGTTAACTAAACAG	CCAATTTTCAGTGGATCCAA	chr12	18047878	18047901	chr12	18049793	18049816
pgrna916	unknown475	Neutral	GTGCACAGTTAACTAAACAG	CTGATATAGCTATATTACAC	chr12	18047878	18047901	chr12	18049894	18049917
pgrna917	unknown475	Neutral	GTGCACAGTTAACTAAACAG	ACATTCTGGGAGTTATTGAA	chr12	18047878	18047901	chr12	18049662	18049685
pgrna918	unknown475	Neutral	GCATCGCACCACAATTACCC	CCATGATTCAGTCATCAGTA	chr12	18048106	18048129	chr12	18049727	18049750
pgrna919	unknown475	Neutral	GCATCGCACCACAATTACCC	CATACAATAATGTTTGTACA	chr12	18048106	18048129	chr12	18049619	18049642
pgrna920	unknown475	Neutral	GCATCGCACCACAATTACCC	CCAATTTTCAGTGGATCCAA	chr12	18048106	18048129	chr12	18049793	18049816
pgrna921	unknown475	Neutral	GCATCGCACCACAATTACCC	CTGATATAGCTATATTACAC	chr12	18048106	18048129	chr12	18049894	18049917
pgrna922	unknown600	Neutral	GGCACATGCGGGGATCTGCA	GGATTTCTCCTGGAATTCCA	chr13	30282970	30282993	chr13	30285012	30285035
pgrna923	unknown600	Neutral	GAAACAGCTGATTCATTTGA	GGATTTCTCCTGGAATTCCA	chr13	30283000	30283023	chr13	30285012	30285035
pgrna924	unknown600	Neutral	GGCACATGCGGGGATCTGCA	CCACACACCACTTCTAGTAA	chr13	30282970	30282993	chr13	30285225	30285248
pgrna925	unknown600	Neutral	GGCACATGCGGGGATCTGCA	CCAAGGATCTGTAAATCCTG	chr13	30282970	30282993	chr13	30284995	30285018
pgrna926	unknown600	Neutral	GATTCATTTGAAGGATGTGG	GGATTTCTCCTGGAATTCCA	chr13	30282991	30283014	chr13	30285012	30285035
pgrna927	unknown600	Neutral	GATTCATTTGAAGGATGTGG	CCACACACCACTTCTAGTAA	chr13	30282991	30283014	chr13	30285225	30285248
pgrna928	unknown600	Neutral	GATTCATTTGAAGGATGTGG	CCAAGGATCTGTAAATCCTG	chr13	30282991	30283014	chr13	30284995	30285018
pgrna929	unknown600	Neutral	GGCACATGCGGGGATCTGCA	CCATGCTGTTAGTAAATCAA	chr13	30282970	30282993	chr13	30285092	30285115
pgrna930	unknown602	Neutral	GTTCATTGTGAAATAGAAAG	AGCCCTGTAGTGGCATCTGG	chr13	34320615	34320638	chr13	34322449	34322472
pgrna931	unknown602	Neutral	GACAAGCCTGTACTACATGT	AGCCCTGTAGTGGCATCTGG	chr13	34320387	34320410	chr13	34322449	34322472
pgrna932	unknown602	Neutral	GTTCATTGTGAAATAGAAAG	GTGACTCCTGTAGACTCAGA	chr13	34320615	34320638	chr13	34322483	34322506
pgrna933	unknown602	Neutral	GTTCATTGTGAAATAGAAAG	TACTGCACTCCACCTCTCTT	chr13	34320615	34320638	chr13	34322349	34322372
pgrna934	unknown602	Neutral	GTATTGCCTTTTAATAAAGC	AGCCCTGTAGTGGCATCTGG	chr13	34320687	34320710	chr13	34322449	34322472
pgrna935	unknown602	Neutral	GTTCATTGTGAAATAGAAAG	TCTGAGTCTACAGGAGTCAC	chr13	34320615	34320638	chr13	34322480	34322503
pgrna936	unknown602	Neutral	TTATAAGTCCTCTTACTAAA	GTGACTCCTGTAGACTCAGA	chr13	34320455	34320478	chr13	34322483	34322506
pgrna937	unknown602	Neutral	GTATTGCCTTTTAATAAAGC	GTGACTCCTGTAGACTCAGA	chr13	34320687	34320710	chr13	34322483	34322506
pgrna938	unknown602	Neutral	GTATTGCCTTTTAATAAAGC	TACTGCACTCCACCTCTCTT	chr13	34320687	34320710	chr13	34322349	34322372
pgrna939	unknown602	Neutral	GTATTGCCTTTTAATAAAGC	TCTGAGTCTACAGGAGTCAC	chr13	34320687	34320710	chr13	34322480	34322503
pgrna940	unknown604	Neutral	AGAGAGGCACCAGAATGCAC	GTGTGGAAAGGATTACCTAA	chr13	34797651	34797674	chr13	34799633	34799656
pgrna941	unknown604	Neutral	ACCATGTGAGGACTCAAGGG	GCCTTCGCAGTGACAAACCT	chr13	34797686	34797709	chr13	34799519	34799542
pgrna942	unknown604	Neutral	TGTGATGACCCCAGTCAGAT	GTGTGGAAAGGATTACCTAA	chr13	34797604	34797627	chr13	34799633	34799656
pgrna943	unknown604	Neutral	AGAGAGGCACCAGAATGCAC	GGGAGATGTGGACAAATCGG	chr13	34797651	34797674	chr13	34799600	34799623
pgrna944	unknown604	Neutral	ACCATGTGAGGACTCAAGGG	GTGTGGAAAGGATTACCTAA	chr13	34797686	34797709	chr13	34799633	34799656
pgrna945	unknown604	Neutral	TGTGATGACCCCAGTCAGAT	GGGAGATGTGGACAAATCGG	chr13	34797604	34797627	chr13	34799600	34799623
pgrna946	unknown604	Neutral	ACCATGTGAGGACTCAAGGG	GGGAGATGTGGACAAATCGG	chr13	34797686	34797709	chr13	34799600	34799623
pgrna947	unknown604	Neutral	AGAGAGGCACCAGAATGCAC	GCCTTCGCAGTGACAAACCT	chr13	34797651	34797674	chr13	34799519	34799542
pgrna948	unknown604	Neutral	TGTGATGACCCCAGTCAGAT	GCCTTCGCAGTGACAAACCT	chr13	34797604	34797627	chr13	34799519	34799542
pgrna949	unknown604	Neutral	AGAGAGGCACCAGAATGCAC	GACTGTCCACAAACATAGCC	chr13	34797651	34797674	chr13	34799278	34799301
pgrna950	unknown612	Neutral	GGACTTTAGAGTCCTCTATG	AATACAATATCCCAAACAGG	chr13	39829592	39829615	chr13	39831677	39831700
pgrna951	unknown612	Neutral	ATTGTTGAGTGAGTCCTAAG	GTGTATCACGGTGTCCACAT	chr13	39829430	39829453	chr13	39831544	39831567
pgrna952	unknown612	Neutral	GGACTTTAGAGTCCTCTATG	ACAGCATGCCCAACAGGTGG	chr13	39829592	39829615	chr13	39831493	39831516
pgrna953	unknown612	Neutral	GGACTTTAGAGTCCTCTATG	ATCCCAGAAAAGCCTAACAG	chr13	39829592	39829615	chr13	39831456	39831479
pgrna954	unknown612	Neutral	AGAGTTCTGCATTCCTATGA	GAGTTGTCTGCAGCCAACTG	chr13	39829799	39829822	chr13	39831431	39831454
pgrna955	unknown612	Neutral	ACTTCACTTCCTTTGAGCGA	GAGTTGTCTGCAGCCAACTG	chr13	39829691	39829714	chr13	39831431	39831454
pgrna956	unknown612	Neutral	ATTGTTGAGTGAGTCCTAAG	GAGTTGTCTGCAGCCAACTG	chr13	39829430	39829453	chr13	39831431	39831454
pgrna957	unknown612	Neutral	GGACTTTAGAGTCCTCTATG	TGAGCTCCAGATGACCTCAC	chr13	39829592	39829615	chr13	39831278	39831301
pgrna958	unknown612	Neutral	AGAGTTCTGCATTCCTATGA	GTGTATCACGGTGTCCACAT	chr13	39829799	39829822	chr13	39831544	39831567
pgrna959	unknown612	Neutral	ACTTCACTTCCTTTGAGCGA	GTGTATCACGGTGTCCACAT	chr13	39829691	39829714	chr13	39831544	39831567
pgrna960	unknown846	Neutral	GCTTCTCTATGGTCTGAGGA	TATATACATGAATTATACGC	chr15	55134090	55134113	chr15	55135831	55135854
pgrna961	unknown846	Neutral	GCCTGATTAGTACAAGTGTG	TCCCATGTTATAGGTAAAGA	chr15	55133970	55133993	chr15	55136011	55136034
pgrna962	unknown846	Neutral	GCTTCTCTATGGTCTGAGGA	GCAAAGCAAGACACTTTGCA	chr15	55134090	55134113	chr15	55135937	55135960
pgrna963	unknown846	Neutral	GCCTGATTAGTACAAGTGTG	TATATACATGAATTATACGC	chr15	55133970	55133993	chr15	55135831	55135854
pgrna964	unknown846	Neutral	CCAAGGTTACATGTACTAAG	GCAAAGCAAGACACTTTGCA	chr15	55133829	55133852	chr15	55135937	55135960
pgrna965	unknown846	Neutral	GCCTGATTAGTACAAGTGTG	GCAAAGCAAGACACTTTGCA	chr15	55133970	55133993	chr15	55135937	55135960
pgrna966	unknown846	Neutral	GCTTCTCTATGGTCTGAGGA	ACCCTCTTTACCTATAACAT	chr15	55134090	55134113	chr15	55136012	55136035
pgrna967	unknown846	Neutral	GCTTCTCTATGGTCTGAGGA	TCCCATGTTATAGGTAAAGA	chr15	55134090	55134113	chr15	55136011	55136034
pgrna968	unknown846	Neutral	TTAGTACAAGTGTGAGGTGA	GCAAAGCAAGACACTTTGCA	chr15	55133976	55133999	chr15	55135937	55135960
pgrna969	unknown846	Neutral	GCCTGATTAGTACAAGTGTG	ACCCTCTTTACCTATAACAT	chr15	55133970	55133993	chr15	55136012	55136035
pgrna970	unknown847	Neutral	GGACTTTGAATACGGTCACA	AGGAACCCAGGAATTCCAAA	chr15	58159570	58159593	chr15	58161214	58161237
pgrna971	unknown847	Neutral	GGTTAAACTGTTGTGCAAAT	ATCCTCCCTTTGGAATTCCT	chr15	58159348	58159371	chr15	58161219	58161242
pgrna972	unknown847	Neutral	GGTTAAACTGTTGTGCAAAT	AGGAACCCAGGAATTCCAAA	chr15	58159348	58159371	chr15	58161214	58161237
pgrna973	unknown847	Neutral	GGACTTTGAATACGGTCACA	ATATGAACTCAGGATTTAAT	chr15	58159570	58159593	chr15	58161171	58161194
pgrna974	unknown847	Neutral	GGACTTTGAATACGGTCACA	AACCCAGGAATTCCAAAGGG	chr15	58159570	58159593	chr15	58161217	58161240
pgrna975	unknown847	Neutral	GGACTTTGAATACGGTCACA	ACACAGTTAGCAATTATTAG	chr15	58159570	58159593	chr15	58161105	58161128
pgrna976	unknown847	Neutral	GGACTTTGAATACGGTCACA	ATCCTCCCTTTGGAATTCCT	chr15	58159570	58159593	chr15	58161219	58161242
pgrna977	unknown847	Neutral	GGTTAAACTGTTGTGCAAAT	ATATGAACTCAGGATTTAAT	chr15	58159348	58159371	chr15	58161171	58161194
pgrna978	unknown847	Neutral	GGTTAAACTGTTGTGCAAAT	AACCCAGGAATTCCAAAGGG	chr15	58159348	58159371	chr15	58161217	58161240
pgrna979	unknown847	Neutral	GGTTAAACTGTTGTGCAAAT	ACACAGTTAGCAATTATTAG	chr15	58159348	58159371	chr15	58161105	58161128
