# Supplementary material for: Enhancing CRISPR deletion via pharmacological delay of DNA-PKcs
Source: HighWire-hosted journal article supplement (doi:10.1101/gr.265736.120), 2021-02-11
Supplement: Supplemental_File_S2.xlsx [file Supplemental_File_S2.xlsx]

## Sheet: Legend
Supplemental File S2. Raw read counts. Sample columns are coded as T<week>_<MOI (035 = 0.35, 06 = 0.6)>__<tre = treated, unt = untreated>
For reproducibility, copy the table sheet in .tsv format when using the Supplemental_Code

## Sheet: Supplemental_File_S2
ID	Gene	T0_035_unt	T0_06_unt	T1_035_tre	T1_035_unt	T1_06_tre	T1_06_unt	T3_035_tre	T3_035_unt	T3_06_tre	T3_06_unt
pgrna0	Essential|RPL3	956	1102	1024	1224	914	957	986	1416	1151	1369
pgrna1	Essential|RPL3	1133	1189	985	1717	1241	1187	1363	1281	1112	1648
pgrna2	Essential|RPL3	1528	1782	1689	2330	1981	1484	2023	1980	2103	1818
pgrna3	Essential|RPL3	1178	1307	1010	1583	774	804	1379	1790	475	490
pgrna4	Essential|RPL3	1341	1299	1270	1424	1102	908	818	1100	607	898
pgrna5	Essential|RPL3	1304	1342	1085	1866	1233	1062	1781	1939	996	968
pgrna6	Essential|RPL3	644	1024	679	779	758	819	486	675	435	755
pgrna7	Essential|RPL3	768	935	623	1223	827	991	662	861	1358	1429
pgrna8	Essential|RPL3	1688	1897	1725	2397	1746	1617	2089	2288	1012	1691
pgrna9	Essential|RPL3	996	1155	1154	1187	1103	1188	1079	1081	1156	1136
pgrna10	Essential|RPL8	1665	1960	1543	1663	1698	1688	1229	1201	1758	2197
pgrna11	Essential|RPL8	1510	1571	1251	1700	1008	1145	1132	1660	784	899
pgrna12	Essential|RPL8	2037	1981	1784	2635	1483	1739	1362	1566	1133	1928
pgrna13	Essential|RPL8	1731	1675	1389	2222	1266	1465	1389	1393	1039	1800
pgrna14	Essential|RPL8	2145	2358	2213	2836	2009	2028	3273	2653	2352	2020
pgrna15	Essential|RPL8	1274	1705	1201	1746	1264	1361	1011	1435	1260	2587
pgrna16	Essential|RPL8	1674	1943	1735	2279	1415	1586	1465	2289	975	1951
pgrna17	Essential|RPL8	2146	2278	1809	2575	1528	1927	1208	1863	1585	1964
pgrna18	Essential|RPL8	1940	2383	1484	2290	1437	1675	1059	1325	963	1463
pgrna19	Essential|RPL8	1724	1723	1430	2239	1187	1124	1144	1465	907	1259
pgrna20	Essential|RPL13	1808	2071	1927	2318	1751	1514	2191	2601	1854	2601
pgrna21	Essential|RPL13	3235	3521	2079	2745	1827	2061	1408	1557	921	1510
pgrna22	Essential|RPL13	1638	1974	1664	2349	1781	1785	1913	2183	1609	2191
pgrna23	Essential|RPL13	1550	1547	1134	2102	1013	1162	1259	1619	781	977
pgrna24	Essential|RPL13	1603	1636	1030	1664	1040	1203	748	918	721	884
pgrna25	Essential|RPL13	1814	2141	1212	1662	1872	1518	688	956	1649	1550
pgrna26	Essential|RPL13	2448	3113	2071	2934	2258	2112	1926	2338	2446	2591
pgrna27	Essential|RPL13	2050	2163	1942	2558	1554	1485	1595	1701	1372	1309
pgrna28	Essential|RPL14	1327	1669	1395	1471	1260	1503	1264	1409	1215	1862
pgrna29	Essential|RPL14	1678	1684	1338	1838	863	1187	1086	1304	572	1388
pgrna30	Essential|RPL14	1465	1489	1515	1902	1348	1425	1468	1681	1381	1450
pgrna31	Essential|RPL14	1307	1159	1589	1874	1029	1158	1929	2431	1254	1114
pgrna32	Essential|RPL14	1157	1137	1401	1695	998	1223	1577	1678	1460	1642
pgrna33	Essential|RPL14	1256	1357	1014	1593	1177	1179	1304	1514	1044	1302
pgrna34	Essential|RPL14	1551	1955	1717	2017	1592	1790	1451	1514	2508	2890
pgrna35	Essential|RPL14	1772	1994	1810	2397	1573	1595	1888	2523	2044	2092
pgrna36	Essential|RPL14	1903	2365	1363	2113	1497	1631	986	1420	1353	1718
pgrna37	Essential|RPL14	1511	1671	1745	2195	1278	1359	2011	1778	1497	1798
pgrna38	Essential|RPL18A	1425	1276	1097	1716	1002	1046	655	782	569	868
pgrna39	Essential|RPL18A	1341	1416	1067	1531	1169	1323	831	1416	1156	1380
pgrna40	Essential|RPL18A	3006	4005	2474	3067	2417	2654	2514	2332	1773	2518
pgrna41	Essential|RPL18A	1310	1818	1152	1577	1186	1336	605	1014	884	1145
pgrna42	Essential|RPL18A	1265	1477	985	1228	1076	1209	756	861	937	1002
pgrna43	Essential|RPL18A	2463	3083	1660	2321	1991	1880	1069	1589	1001	1026
pgrna44	Essential|RPL18A	3022	3321	2416	2880	2193	2156	1463	1883	1789	1815
pgrna45	Essential|RPL18A	1673	1750	1280	1732	1257	1112	793	934	1306	1119
pgrna46	Essential|RPL18A	2146	2241	1744	2034	1200	1493	1003	1355	1031	1689
pgrna47	Essential|RPL18A	1314	1414	1070	1458	1326	1135	812	1176	1225	1511
pgrna48	Essential|RPL21	885	947	877	1553	761	897	1650	1336	1127	794
pgrna49	Essential|RPL21	1301	1487	1196	1615	1093	1246	986	1291	703	1018
pgrna50	Essential|RPL21	918	1155	799	1283	881	978	623	719	805	1122
pgrna51	Essential|RPL21	988	1179	1125	1343	1097	892	1272	1028	1239	1093
pgrna52	Essential|RPL21	1350	1708	1187	1675	1282	1391	904	1534	1245	1780
pgrna53	Essential|RPL21	1670	1832	1363	2191	1485	1358	1404	2353	1438	1660
pgrna54	Essential|RPL21	1370	1577	1487	1856	1274	1187	1783	1686	1493	986
pgrna55	Essential|RPL21	2150	2140	1545	2453	1153	1576	1184	1770	786	967
pgrna56	Essential|RPL21	1289	1398	1189	1814	1284	1166	1077	1357	1081	1622
pgrna57	Essential|RPL21	1479	1436	1063	1417	1232	1138	1157	1118	1098	1531
pgrna58	Essential|RPL23	714	994	963	1291	921	758	1285	1209	880	727
pgrna59	Essential|RPL23	1225	1370	1212	1623	1342	1136	1714	1774	979	1360
pgrna60	Essential|RPL23	924	984	890	1215	827	723	575	792	683	682
pgrna61	Essential|RPL23	2027	2388	1790	2358	2135	1814	1508	1617	1686	2177
pgrna62	Essential|RPL23	600	631	454	801	431	429	283	508	346	369
pgrna63	Essential|RPL23	1667	2143	1234	1650	1261	1517	915	1130	1019	1295
pgrna64	Essential|RPL23	608	651	492	715	382	417	336	492	392	481
pgrna65	Essential|RPL23	3045	2901	2493	4369	1915	2319	2457	3518	1434	2341
pgrna66	Essential|RPL23	2998	3524	2180	3075	2097	2339	1671	2836	1644	2314
pgrna67	Essential|RPL23	653	649	518	830	672	554	706	954	666	598
pgrna68	Essential|RPL23A	1873	2053	1717	2349	1688	1672	1774	2277	1883	1891
pgrna69	Essential|RPL23A	2770	2649	1730	2512	1779	1778	1918	2383	1689	1718
pgrna70	Essential|RPL23A	1215	1387	1128	1339	994	1244	1325	1320	1181	1603
pgrna71	Essential|RPL23A	873	691	921	1154	536	605	1079	1118	427	501
pgrna72	Essential|RPL23A	1344	1213	1307	1678	1175	1233	1637	1518	1162	1498
pgrna73	Essential|RPL23A	2184	2536	1664	2446	1744	2104	1338	2045	1173	1878
pgrna74	Essential|RPL23A	1334	1394	1269	1726	1097	1508	1665	2229	1505	1421
pgrna75	Essential|RPL23A	823	959	1046	1361	799	906	1413	1071	710	1202
pgrna76	Essential|RPL23A	1345	1799	1160	1467	1233	1373	1277	1214	1185	1432
pgrna77	Essential|RPL30	1910	2328	1624	2348	1953	1644	1701	1979	1915	1795
pgrna78	Essential|RPL30	1809	1814	1240	1646	1037	1076	924	1461	631	896
pgrna79	Essential|RPL30	1918	2382	2012	2749	1869	1903	1595	1876	1640	1643
pgrna80	Essential|RPL30	1899	1906	1664	2005	1449	1689	1588	1759	1492	1751
pgrna81	Essential|RPL30	901	758	880	1296	493	632	809	1006	338	461
pgrna82	Essential|RPL30	1912	2179	1543	2081	1586	1682	1267	1157	1806	1710
pgrna83	Essential|RPL30	1835	2054	1742	2651	1658	1486	1876	2547	1890	2085
pgrna84	Essential|RPL30	2205	2180	1927	2332	1773	1909	1691	1971	1741	2406
pgrna85	Essential|RPL30	1231	1321	1090	1638	795	714	1095	1639	609	833
pgrna86	Essential|RPL30	474	774	494	568	393	549	311	440	168	195
pgrna87	Essential|RPL34	1635	1530	1436	1877	1297	1502	1286	1254	1269	1745
pgrna88	Essential|RPL34	1597	1863	1587	1830	1397	1210	1303	1729	1348	1306
pgrna89	Essential|RPL34	1139	1187	1143	1450	980	1020	1633	1410	1051	1312
pgrna90	Essential|RPL34	1600	1706	1655	2115	1395	1662	1695	2041	1622	2133
pgrna91	Essential|RPL34	1534	1829	1532	1974	1671	1700	1557	2139	1946	2124
pgrna92	Essential|RPL34	1074	1362	845	1206	1095	925	835	614	792	1403
pgrna93	Essential|RPL34	1595	1698	1245	1841	1422	1232	1145	1743	1152	1308
pgrna94	Essential|RPL34	1061	1328	1096	1556	1254	1143	971	992	1767	1430
pgrna95	Essential|RPL34	1026	1409	987	1602	1221	1589	1021	1320	1081	1565
pgrna96	Essential|RPL34	1476	1640	1300	1939	1443	1342	1030	1336	1552	1656
pgrna97	Essential|CCND1	2256	2488	1713	2414	2073	1804	1225	1887	1315	1503
pgrna98	Essential|CCND1	1559	1907	2120	2364	1507	1435	1610	3842	904	1222
pgrna99	Essential|CCND1	1549	1538	1377	1856	1138	1276	940	1567	791	1172
pgrna100	Essential|CCND1	1957	2201	1997	2466	1530	1878	1498	2014	1161	1611
pgrna101	Essential|CCND1	1669	1756	1380	2016	1400	1293	1020	1248	1040	1546
pgrna102	Essential|EIF3G	2518	2749	1615	2163	1656	1396	745	1119	901	715
pgrna103	Essential|EIF3G	2394	2676	2025	2608	1698	2063	1430	1730	1093	2170
pgrna104	Essential|EIF3G	1904	2153	1459	2137	1324	1427	1075	1825	1237	1244
pgrna105	Essential|EIF3G	1701	1706	1262	1571	1080	1195	935	1130	557	605
pgrna106	Essential|EIF3G	2391	2616	2918	3784	2774	2173	3202	2640	2167	2551
pgrna107	Essential|EIF5B	912	1088	814	1154	993	937	1031	917	786	1085
pgrna108	Essential|EIF5B	1585	2176	1543	2239	1721	1639	1660	2278	1644	1690
pgrna109	Essential|EIF5B	1097	1152	995	1391	1092	996	1411	1194	1159	899
pgrna110	Essential|EIF5B	560	543	583	447	438	417	429	525	417	503
pgrna111	Essential|EIF5B	1473	1506	1275	1938	1287	1323	1079	1349	1104	1407
pgrna112	Essential|HNRNPM	1340	1677	1424	1996	1474	1384	1841	3216	1553	1650
pgrna113	Essential|HNRNPM	1186	1290	1549	1775	1336	1094	1575	1377	1272	1240
pgrna114	Essential|HNRNPM	1347	1796	1274	1821	1630	1586	931	1314	1815	1645
pgrna115	Essential|HNRNPM	1572	1730	1580	2000	1307	1481	1528	1890	1461	1807
pgrna116	Essential|HNRNPM	1295	1576	1196	1632	1166	1182	1383	1687	1023	1605
pgrna117	Essential|KARS	2166	2186	1567	1991	1645	1692	797	731	1340	1770
pgrna118	Essential|KARS	1280	1687	960	1747	1101	1399	644	906	805	1228
pgrna119	Essential|KARS	1559	1863	1427	1817	1802	1746	1494	2033	2584	1815
pgrna120	Essential|KARS	1512	1476	1201	1749	1224	1355	890	862	1138	1042
pgrna121	Essential|KARS	1716	1941	1618	2458	1384	1687	1492	2240	1517	1834
pgrna122	Essential|NFE2L2	1800	2235	1780	3660	1666	1837	1999	2323	1722	2113
pgrna123	Essential|NFE2L2	2250	2326	2083	2843	2121	2112	1999	2669	2738	2746
pgrna124	Essential|NFE2L2	1752	1552	1758	2223	1576	1604	1686	2333	1338	1663
pgrna125	Essential|NFE2L2	1627	1912	1729	2556	1907	1482	2476	3144	2262	2117
pgrna126	Essential|NFE2L2	1902	1674	1835	2378	1705	1485	1659	2197	1737	1555
pgrna127	Essential|NHP2L1	1846	2068	1919	2425	1746	1855	2287	1857	1923	2334
pgrna128	Essential|NHP2L1	1943	2270	1971	2618	2192	1925	2059	2103	2345	2449
pgrna129	Essential|NHP2L1	1823	1874	1829	2319	1587	1550	2106	2495	1701	1302
pgrna130	Essential|NHP2L1	2628	2879	2619	2989	2377	2139	2169	3052	2152	2223
pgrna131	Essential|NHP2L1	1310	1661	1531	1921	1532	1221	1741	2264	1198	1268
pgrna132	Essential|SNRNP200	1789	2234	1752	2567	1730	1928	1602	1864	1732	1681
pgrna133	Essential|SNRNP200	1175	1343	1090	1597	1142	1314	1296	1451	1411	1673
pgrna134	Essential|SNRNP200	2260	2770	2873	3794	3114	2750	3381	3734	3866	3763
pgrna135	Essential|SNRNP200	1234	1528	1134	1540	1413	1212	1260	1218	2580	2566
pgrna136	Essential|SNRNP200	1139	1146	1135	1528	965	906	899	1175	1079	1428
pgrna137	Essential|TP53	2065	2379	2091	2368	1874	1949	1493	1607	1893	2259
pgrna138	Essential|TP53	1717	1707	1636	2027	1419	1401	1725	1722	1442	1743
pgrna139	Essential|TP53	2630	2472	2824	3769	2364	2085	3294	3461	1822	2200
pgrna140	Essential|TP53	1786	1884	1974	2165	1348	1474	2106	2342	1268	1425
pgrna141	Essential|TP53	1668	1872	2008	2204	1407	1535	1514	2212	946	1740
pgrna142	Essential|RPS15A	1091	1342	1144	1312	1096	1081	1297	1337	1741	1538
pgrna143	Essential|RPS15A	1214	1571	1279	1690	1093	1248	1217	1205	1037	1707
pgrna144	Essential|RPS15A	1567	1694	1375	2042	1594	1352	1502	2310	1284	1366
pgrna145	Essential|RPS15A	1213	1486	945	1534	1191	1410	1074	1305	1040	1539
pgrna146	Essential|RPS15A	1414	1716	1412	1890	873	922	1791	1787	553	966
pgrna147	Essential|ADAT1	1650	1953	1704	2158	1714	1781	1299	1729	2056	2522
pgrna148	Essential|ADAT1	1888	2115	2199	2817	2054	1922	2602	2426	1893	1681
pgrna149	Essential|ADAT1	1384	1501	1522	2019	1275	1104	1678	1773	1097	1197
pgrna150	Essential|ADAT1	997	939	1100	1883	852	854	1285	1691	661	859
pgrna151	Essential|ADAT1	1117	1909	1011	1702	1391	1240	1108	1125	1751	1706
pgrna152	Essential|AKT1	1792	2404	1747	2786	1748	1975	1538	2967	1420	1974
pgrna153	Essential|AKT1	686	793	486	910	630	634	358	602	723	762
pgrna154	Essential|AKT1	2126	2392	2447	2990	2600	2143	2731	3344	1692	2100
pgrna155	Essential|AKT1	1339	1920	1591	1772	1409	1669	1208	1386	1142	1306
pgrna156	Essential|AKT1	901	1170	940	1263	884	1128	838	790	650	940
pgrna157	Essential|ALDH16A1	2091	2815	2095	2661	2307	2266	2129	3023	2456	3436
pgrna158	Essential|ALDH16A1	1354	1711	1467	2233	1212	1498	1344	1802	1407	1808
pgrna159	Essential|ALDH16A1	1750	2525	1941	2571	2155	2077	2037	2059	2550	2847
pgrna160	Essential|ALDH16A1	2444	2795	2667	3375	2546	2298	2603	2746	3244	4433
pgrna161	Essential|ALDH16A1	1434	1176	1127	1386	1125	1162	1085	1319	1206	964
pgrna162	Essential|ATM	1366	1510	1408	1916	1060	1064	1632	1634	896	729
pgrna163	Essential|ATM	679	848	549	900	709	722	723	888	494	546
pgrna164	Essential|ATM	1724	1708	1647	2525	1738	1629	1887	2944	1730	1807
pgrna165	Essential|ATM	1680	1708	1524	2260	1576	1813	1664	2084	2098	2127
pgrna166	Essential|ATM	1307	1541	1311	1795	1126	1185	1309	1113	1223	1562
pgrna167	Essential|BECN1	1180	1284	904	1245	1070	1226	695	1042	554	979
pgrna168	Essential|BECN1	1709	1962	1702	2233	1162	1664	1589	1619	1384	1320
pgrna169	Essential|BECN1	1436	1700	1114	1917	1103	1059	1319	1812	961	1149
pgrna170	Essential|BECN1	1347	1747	1170	1522	1113	1426	1163	952	1516	2115
pgrna171	Essential|BECN1	1456	1774	1311	1838	1217	1180	1040	1440	797	985
pgrna172	Essential|BRCA2	874	1037	804	1477	787	925	688	996	687	950
pgrna173	Essential|BRCA2	979	1552	1185	1364	1230	1039	1013	1168	1040	1006
pgrna174	Essential|BRCA2	1014	1188	1095	1531	1317	1204	957	1126	1035	917
pgrna175	Essential|BRCA2	1424	1225	1619	2428	1317	1216	1344	1594	1007	844
pgrna176	Essential|BRCA2	872	1081	871	1389	1047	1107	959	1645	879	1219
pgrna177	Essential|C1R	1065	1005	1097	1354	975	916	779	1239	769	910
pgrna178	Essential|C1R	637	1016	770	1038	630	804	1323	1512	670	844
pgrna179	Essential|C1R	1203	1572	1732	2299	1381	1451	1610	2496	1895	1908
pgrna180	Essential|C1R	1199	1322	1259	1756	1075	1006	1104	1361	985	1018
pgrna181	Essential|CLEC2B	1778	1835	1838	2476	1636	1697	2570	3218	1044	998
pgrna182	Essential|CLEC2B	1341	1629	1603	2295	1470	1269	1513	2010	1644	1684
pgrna183	Essential|CLEC2B	1990	2246	2241	2814	1910	1765	2440	2091	1705	2037
pgrna184	Essential|CLEC2B	2156	2027	2297	2801	1733	1838	2060	2245	1446	1895
pgrna185	Essential|CLEC2B	789	1026	1087	1170	982	929	1291	1289	1495	1125
pgrna186	Essential|CLSTN3	835	1016	891	1191	1087	709	856	940	880	833
pgrna187	Essential|CLSTN3	1249	1375	1239	1385	1130	1052	1469	1257	1231	1137
pgrna188	Essential|CLSTN3	1034	961	1248	1402	1126	922	1256	1379	701	743
pgrna189	Essential|CLSTN3	1386	1416	1461	1713	1262	1279	1181	1690	1486	1471
pgrna190	Essential|CLSTN3	1007	1344	1142	1450	1056	1296	1031	1092	1253	2512
pgrna191	Essential|DAG1	1353	1421	1273	1680	1399	1429	1376	1435	1253	1584
pgrna192	Essential|DAG1	1191	976	1201	1547	888	999	971	1102	1029	1522
pgrna193	Essential|DAG1	1732	1708	1631	2069	1182	1208	1412	1708	806	1060
pgrna194	Essential|DAG1	2295	1917	1738	2306	1269	1329	1481	1743	1024	1639
pgrna195	Essential|DAG1	1563	1811	1590	2200	1281	1586	1428	2194	1151	1331
pgrna196	Essential|EPHA2	2749	2896	3146	3346	2704	2444	2830	2809	2556	2474
pgrna197	Essential|EPHA2	1991	2451	2152	3011	1997	1667	1884	2366	2008	2324
pgrna198	Essential|EPHA2	1979	2887	2142	2832	2433	2571	2387	2444	2659	2718
pgrna199	Essential|EPHA2	827	1029	873	1187	883	945	1154	1149	715	1143
pgrna200	Essential|ERCC1	1681	1981	1541	2499	1209	1430	1196	1470	1080	1115
pgrna201	Essential|ERCC1	739	776	646	946	941	883	583	727	1120	1124
pgrna202	Essential|ERCC1	1038	1109	946	1612	963	750	910	1248	836	838
pgrna203	Essential|ERCC1	1643	1812	1626	1927	1250	1519	1324	1762	1254	2015
pgrna204	Essential|ERCC1	1281	1470	1140	1472	1190	1086	1107	1117	1192	1203
pgrna205	Essential|ETV6	1332	1665	1333	2262	1321	1699	1466	1889	1795	1767
pgrna206	Essential|ETV6	1825	2127	1986	2850	1819	1823	2113	2327	2326	2676
pgrna207	Essential|ETV6	887	783	880	1126	685	714	782	855	499	608
pgrna208	Essential|ETV6	1283	1453	1179	1579	1329	1253	875	1271	1911	2029
pgrna209	Essential|FAM188A	2366	2589	2744	2893	2303	2165	2657	2744	2447	2556
pgrna210	Essential|FAM188A	1230	1291	1248	1738	1038	1283	1358	1428	930	1553
pgrna211	Essential|FAM188A	2012	2253	2112	3062	2291	2035	2055	2863	2650	2947
pgrna212	Essential|FAM188A	1633	1701	1714	1958	1534	1497	1923	2403	1549	1546
pgrna213	Essential|FAM188A	1978	2177	2394	2739	1858	1804	2691	3271	2243	2599
pgrna214	Essential|IK	1379	1287	1460	1702	1122	1168	1294	1574	743	747
pgrna215	Essential|IK	1559	1574	1768	2228	1334	1296	1924	2423	1080	1268
pgrna216	Essential|IK	22	7	18	30	0	32	13	0	0	42
pgrna217	Essential|IK	1751	1898	1639	2180	1497	1555	1195	1644	1274	1522
pgrna218	Essential|IK	1659	1624	1666	2278	1554	1621	1500	1878	1699	2111
pgrna219	Essential|ING5	1437	1718	1795	1921	1438	1514	1968	1470	2153	1939
pgrna220	Essential|ING5	1228	1243	1004	1467	1266	1231	895	1338	2053	2005
pgrna221	Essential|ING5	1467	1836	1380	2216	1423	1529	1247	1830	999	1633
pgrna222	Essential|ING5	700	632	655	977	580	751	610	652	1414	1381
pgrna223	Essential|KEAP1	1090	1239	1381	1763	1286	1048	1829	1549	1403	1751
pgrna224	Essential|KEAP1	713	772	894	1187	798	761	788	981	1048	1258
pgrna225	Essential|KEAP1	1278	1423	1385	1710	1309	1384	1374	976	1100	939
pgrna226	Essential|KEAP1	2146	2235	2333	3060	2095	2232	2679	2794	1654	2869
pgrna227	Essential|KEAP1	1098	1546	1336	1908	1089	1086	1589	1505	1123	1802
pgrna228	Essential|LCP1	1547	1754	1980	2561	1629	1647	2059	2382	1553	1837
pgrna229	Essential|LCP1	514	737	583	806	376	485	436	569	382	527
pgrna230	Essential|LCP1	1793	1912	2102	2472	1536	1675	2153	2410	1595	1971
pgrna231	Essential|LCP1	1139	1585	1302	2181	1198	1396	1463	1188	1388	1367
pgrna232	Essential|LCP1	1103	1083	1135	1595	1204	1213	1152	1411	1212	1384
pgrna233	Essential|MSMO1	1906	2075	2212	2738	1815	1883	2491	2251	1603	1838
pgrna234	Essential|MSMO1	1882	1891	1824	2764	1518	1557	2800	2543	2002	1639
pgrna235	Essential|MSMO1	554	570	559	672	548	424	574	657	326	528
pgrna236	Essential|MSMO1	1172	1008	1116	1450	1021	924	1077	1267	1067	941
pgrna237	Essential|MSMO1	2472	2425	2356	3470	2220	2231	2982	3694	1804	2176
pgrna238	Essential|NF1	1197	1314	1192	1789	1268	1149	1694	2172	1531	1993
pgrna239	Essential|NF1	1383	1167	1204	1688	1072	1034	1207	1778	929	1328
pgrna240	Essential|NF1	1012	989	1150	1296	972	856	1480	1440	1155	753
pgrna241	Essential|NF1	819	854	716	1115	738	821	555	820	686	1117
pgrna242	Essential|NF1	4083	4612	4683	6395	4223	4248	5609	6640	5058	5465
pgrna243	Essential|PLXNB2	3040	2881	3196	3688	2789	2794	3619	3934	3317	3840
pgrna244	Essential|PLXNB2	1927	2185	2122	2630	2168	1929	1936	2437	2188	2291
pgrna245	Essential|PLXNB2	1569	2096	1969	2684	2010	1905	1741	2012	1781	1586
pgrna246	Essential|PLXNB2	2332	2435	2304	3683	2171	2177	2945	3850	2214	2803
pgrna247	Essential|PLXNB2	1053	1072	1179	1816	1199	1303	1253	1623	1339	1332
pgrna248	Essential|PPAP2C	2490	2708	2637	3254	2615	2062	2604	2834	2764	2955
pgrna249	Essential|PPAP2C	2519	3012	2669	3677	2923	2760	2676	2978	3842	3973
pgrna250	Essential|PPAP2C	1805	1772	1763	2341	1815	1869	2105	2298	2240	2629
pgrna251	Essential|PPAP2C	3959	4867	4528	5314	4290	4439	3965	5131	4548	5155
pgrna252	Essential|PPAP2C	1982	2349	1906	2495	2196	2563	1296	1824	2549	2359
pgrna253	Essential|PPIL2	1176	1425	1413	1636	1218	1161	1860	1638	936	1461
pgrna254	Essential|PPIL2	1031	1509	1218	1339	1010	971	1071	1023	749	635
pgrna255	Essential|PPIL2	1480	1846	1470	2279	1338	1371	1105	1700	1149	1266
pgrna256	Essential|PPIL2	2033	2274	1772	2880	1670	1901	1470	1718	1504	1580
pgrna257	Essential|PPIL2	1821	2069	1874	2522	2129	2146	1640	2242	2902	2606
pgrna258	Essential|PRDM1	810	874	633	868	677	693	670	465	951	1136
pgrna259	Essential|PRDM1	1019	1025	971	1225	848	868	756	1021	737	1047
pgrna260	Essential|PRDM1	1172	1291	975	1660	1119	908	802	984	747	656
pgrna261	Essential|PRDM1	1412	1283	1397	1507	1068	1086	1159	1372	762	982
pgrna262	Essential|PRDM1	353	490	310	514	445	460	426	396	475	577
pgrna263	Essential|PTCH1	1172	1495	1493	1394	1499	1146	1180	1487	917	911
pgrna264	Essential|PTCH1	1149	1188	1479	1557	1205	1148	1543	1428	1615	2131
pgrna265	Essential|PTCH1	2500	3034	2814	3927	2853	2912	2753	3546	3464	3585
pgrna266	Essential|PTCH1	2647	2761	2476	3534	2453	2784	2352	2984	2930	3219
pgrna267	Essential|PTCH1	2292	2507	2627	3551	2096	2502	2803	3620	2651	3405
pgrna268	Essential|RB1	1854	2365	2424	3022	1965	2143	3349	2803	2243	2367
pgrna269	Essential|RB1	1859	2130	2387	2755	2005	1852	2296	2300	1916	2557
pgrna270	Essential|RB1	747	846	1069	1227	897	856	1322	1286	1159	839
pgrna271	Essential|RB1	1308	1616	1790	2105	1339	1522	1528	1667	1198	1578
pgrna272	Essential|RB1	1561	2116	1775	2366	1752	1853	1439	1769	1189	1548
pgrna273	Essential|RBM5	2248	2463	2335	3284	2054	2138	1977	2172	2044	2205
pgrna274	Essential|RBM5	1682	1995	1454	1904	1408	1472	1650	1594	1028	1207
pgrna275	Essential|RBM5	717	957	792	1237	877	785	738	900	712	800
pgrna276	Essential|RBM5	3404	3597	3740	4123	3187	2792	3972	4342	2936	3681
pgrna277	Essential|RBM5	2794	2995	2991	4106	2308	2642	3805	3664	1669	2138
pgrna278	Essential|RRM2B	1842	2032	1623	2536	1747	1737	1484	1882	1825	2124
pgrna279	Essential|RRM2B	1902	2098	1849	2575	1688	1383	1350	2305	1192	1567
pgrna280	Essential|RRM2B	1566	1897	1430	1860	1497	1342	1222	1672	1491	2003
pgrna281	Essential|RRM2B	1417	1577	1137	1886	1553	1459	1146	1892	2081	1711
pgrna282	Essential|RRM2B	2498	2602	2150	2834	1999	2070	1833	2730	1668	2858
pgrna283	Essential|SERPINB8	1247	1281	1348	1823	1100	1082	1368	1737	1212	1075
pgrna284	Essential|SERPINB8	1404	1626	1568	2165	1730	1788	1671	2018	2336	2540
pgrna285	Essential|SERPINB8	1200	1570	1439	1592	1399	1241	1726	1661	1091	1187
pgrna286	Essential|SERPINB8	1109	1321	1185	1266	1099	1017	1088	1191	686	712
pgrna287	Essential|SERPINB8	1668	1747	1968	2559	1685	1332	1604	1968	1253	1745
pgrna288	Essential|SLC24A1	883	957	741	1038	643	693	799	824	993	818
pgrna289	Essential|SLC24A1	1185	1127	1154	1581	1188	1049	1003	1313	1684	1358
pgrna290	Essential|SLC24A1	1233	1450	1304	1854	1423	1387	1279	1467	1486	1634
pgrna291	Essential|SLC24A1	1092	1284	1176	1247	1079	1016	1134	1050	1039	1259
pgrna292	Essential|SLC24A1	1460	1593	1859	1957	1589	1626	2661	2202	1790	1878
pgrna293	Essential|SMAD4	1414	1701	1460	1980	1489	1702	1821	2354	1300	1695
pgrna294	Essential|SMAD4	1159	1317	1303	1432	1210	1136	1286	1360	753	1020
pgrna295	Essential|SMAD4	1571	1645	1404	1931	1633	1320	1394	1765	1706	1358
pgrna296	Essential|SMAD4	1553	1908	1632	1853	1625	1560	1879	1752	1802	1820
pgrna297	Essential|SMAD4	1287	1522	1176	1237	1553	1243	1209	1111	1694	1661
pgrna298	Essential|SNAPC5	1730	2208	1218	2025	1612	1524	1040	1048	919	1191
pgrna299	Essential|SNAPC5	1816	2056	1422	1952	1295	1604	955	1159	903	1064
pgrna300	Essential|SNAPC5	1923	2191	1453	2177	1717	1490	1084	1313	1551	1634
pgrna301	Essential|SNAPC5	1271	1247	1086	1465	1019	1086	1184	1388	1374	1438
pgrna302	Essential|SNAPC5	1976	2608	1761	2813	1911	1907	1273	2134	1747	1726
pgrna303	Essential|SRGAP2	770	924	784	1294	727	775	855	1050	546	900
pgrna304	Essential|SRGAP2	654	660	673	996	549	577	717	943	542	712
pgrna305	Essential|SRGAP2	1528	1796	1926	1907	1646	1571	2251	2287	1085	1797
pgrna306	Essential|SRGAP2	1818	1697	2198	2684	1614	1404	2140	2197	1405	1260
pgrna307	Essential|SRGAP2	1945	2221	1898	2865	1985	2299	1699	3026	2471	3575
pgrna308	Essential|STK11	1086	1117	1158	1197	1270	1100	1000	948	1066	1201
pgrna309	Essential|STK11	1964	1964	2069	2948	2012	2070	1972	2715	2701	2865
pgrna310	Essential|STK11	1343	1363	1579	1971	1286	1445	1748	1987	1742	2262
pgrna311	Essential|STK11	1889	2929	2472	2752	3566	4214	2370	2499	7716	9185
pgrna312	Essential|STK11	1020	914	1031	1570	905	978	1214	1792	791	904
pgrna313	Essential|UCK1	2293	2711	2148	2651	2383	2216	1807	1914	1329	1837
pgrna314	Essential|UCK1	1618	1694	1548	2217	1272	1233	1318	1869	1583	1533
pgrna315	Essential|UCK1	2412	2892	2520	3142	2368	2585	2249	2345	1974	2341
pgrna316	Essential|UCK1	2594	2845	2971	3318	2243	2404	2942	2849	1993	2220
pgrna317	Essential|UCK1	1520	1963	1455	1741	1287	1326	1491	1622	1268	1247
pgrna318	Essential|USP24	1782	1871	1452	1934	1320	1246	1229	1667	1149	1511
pgrna319	Essential|USP24	1121	1106	914	1450	697	870	1008	1194	950	1074
pgrna320	Essential|USP24	2199	2557	2092	2897	2026	2074	1829	2668	2511	2714
pgrna321	Essential|USP24	1735	1761	1605	2516	1544	1909	1929	2292	1559	2065
pgrna322	Essential|USP24	866	1062	860	1133	786	983	1145	1336	883	1262
pgrna323	Essential|XPA	1338	1680	1061	1540	1335	1384	1183	1398	1291	1108
pgrna324	Essential|XPA	843	900	1062	1297	855	842	1421	1379	1427	1037
pgrna325	Essential|XPA	801	1143	1029	998	992	1036	1542	1203	1207	1318
pgrna326	Essential|XPA	1643	2464	1958	2500	2129	1553	2391	2267	2001	2546
pgrna327	Essential|XPA	824	811	848	994	585	758	1088	1194	673	609
pgrna328	Essential|H19	2392	2917	2577	3071	2289	2459	2299	2905	2242	2947
pgrna329	Essential|H19	1632	1773	1927	2637	1486	1694	2280	2982	1642	1679
pgrna330	Essential|H19	4825	5099	4403	6501	5103	4592	4827	5945	6997	6871
pgrna331	Essential|H19	2121	1906	2251	2791	1842	1901	2188	2090	2558	1983
pgrna332	Essential|H19	3571	3454	3586	4434	3157	3196	4611	6136	3178	3697
pgrna333	Essential|H19	1779	1962	1765	2491	1760	1642	1578	2112	1673	1679
pgrna334	Essential|H19	1848	1895	1612	2362	1530	1618	1970	3188	1661	2025
pgrna335	Essential|H19	1426	1230	2026	2090	937	1031	1524	2326	1030	1087
pgrna336	Essential|H19	4589	5056	5552	6825	4474	4082	5829	6753	4207	4636
pgrna337	Essential|H19	1892	2107	2171	3039	2096	2053	2156	2597	2560	2460
pgrna338	Essential|PTEN	1516	1829	1307	1925	1621	1612	1511	1493	1329	1818
pgrna339	Essential|PTEN	1062	1027	944	1386	782	847	602	782	599	733
pgrna340	Essential|PTEN	1035	1231	908	1345	932	938	1052	1138	664	1113
pgrna341	Essential|PTEN	2120	2160	1838	2634	1456	1573	1290	1922	814	1329
pgrna342	Essential|PTEN	984	1147	981	1363	828	1031	1208	1206	727	953
pgrna343	Essential|PTEN	2384	2187	1854	2336	1446	1735	1512	2024	1155	1596
pgrna344	Essential|PTEN	986	881	888	1437	532	780	924	999	540	995
pgrna345	Essential|PTEN	2565	2981	2911	3024	2325	2406	2797	2672	2522	2979
pgrna346	Essential|PTEN	1367	1833	1316	1757	1370	1445	1225	1429	1325	1659
pgrna347	Essential|PTEN	911	955	947	1150	615	717	1127	1018	606	807
pgrna348	Neutral|unknown1045	1416	1563	1380	1896	1475	1214	1103	1828	1320	1145
pgrna349	Neutral|unknown1045	2019	2015	2279	3044	2029	1885	2847	4057	2234	2542
pgrna350	Neutral|unknown1045	1115	1353	1142	1713	1266	1101	1291	1554	1222	1160
pgrna351	Neutral|unknown1045	727	732	921	990	894	885	755	1157	799	716
pgrna352	Neutral|unknown1045	800	1083	1357	1480	1135	903	2166	1521	1177	1081
pgrna353	Neutral|unknown1045	931	1101	1051	1457	942	956	1227	1397	719	873
pgrna354	Neutral|unknown1045	918	1069	1000	1406	1142	876	1519	1176	826	1164
pgrna355	Neutral|unknown1045	755	750	607	858	438	577	707	751	503	789
pgrna356	Neutral|unknown1045	1425	1727	1196	1956	1549	1594	1534	1595	1653	1818
pgrna357	Neutral|unknown1045	1308	1575	1496	1963	1369	1314	1314	1824	1459	1614
pgrna358	Neutral|unknown1065	631	651	659	899	524	403	504	469	338	251
pgrna359	Neutral|unknown1065	1161	1468	1344	1975	1465	1534	1406	2572	1965	1723
pgrna360	Neutral|unknown1065	1675	2073	1793	2516	2196	1949	1821	2087	2554	2833
pgrna361	Neutral|unknown1065	2429	2307	2369	2874	2673	2187	2394	2678	2768	2569
pgrna362	Neutral|unknown1065	1058	1632	1268	2031	1579	1473	1035	1180	1182	1371
pgrna363	Neutral|unknown1065	1032	1437	1200	1651	1614	1220	1279	1620	933	985
pgrna364	Neutral|unknown1065	1683	1751	2272	2494	1895	1876	2662	2547	2789	3010
pgrna365	Neutral|unknown1065	1698	1536	1516	2390	1290	1196	1798	2061	1322	1205
pgrna366	Neutral|unknown1065	1727	2002	2215	2559	2176	1838	2874	2726	2604	2414
pgrna367	Neutral|unknown1065	1279	1317	1312	1803	1338	1285	1356	1408	1696	1884
pgrna368	Neutral|unknown1066	1784	2043	2131	2745	1750	1663	2607	2680	1851	2001
pgrna369	Neutral|unknown1066	1538	1451	1510	1828	1409	1195	1832	1346	2630	2158
pgrna370	Neutral|unknown1066	1587	1792	1653	2176	1848	1629	1994	1904	2564	3454
pgrna371	Neutral|unknown1066	1724	1654	1880	2427	1407	1356	2051	2458	1604	1602
pgrna372	Neutral|unknown1066	1774	2078	2267	2584	1753	1865	2572	2550	1696	1971
pgrna373	Neutral|unknown1066	929	1191	1173	1462	1013	1153	1175	1479	1277	2301
pgrna374	Neutral|unknown1066	1096	1221	1137	1682	1193	1254	1525	1873	990	1073
pgrna375	Neutral|unknown1066	876	892	950	1174	711	787	913	1419	808	1073
pgrna376	Neutral|unknown1066	961	1181	1146	1253	926	1046	1368	1005	953	946
pgrna377	Neutral|unknown1066	1083	1942	1318	1762	2224	1942	1415	1689	2771	2725
pgrna378	Neutral|unknown1114	929	996	854	1350	890	966	837	1320	1035	1197
pgrna379	Neutral|unknown1114	1450	1539	1670	1828	1341	1478	2184	2473	1347	1974
pgrna380	Neutral|unknown1114	1161	1309	1335	1969	1292	1420	1589	2328	1914	2144
pgrna381	Neutral|unknown1114	925	1052	995	1531	916	778	1076	1245	926	747
pgrna382	Neutral|unknown1114	1289	1351	1598	1592	1192	1398	1885	2176	1556	2037
pgrna383	Neutral|unknown1114	635	685	716	1045	686	544	851	724	650	681
pgrna384	Neutral|unknown1114	623	850	608	963	1082	857	612	1007	872	929
pgrna385	Neutral|unknown1114	1763	1650	2106	2493	1916	1741	2239	2525	2105	2029
pgrna386	Neutral|unknown1114	676	811	881	1158	919	562	969	1322	1072	816
pgrna387	Neutral|unknown1114	1204	1273	1289	1597	1247	1397	1834	1749	1743	1768
pgrna388	Neutral|unknown1115	2059	2116	2416	3181	2266	1882	3146	3214	2182	2299
pgrna389	Neutral|unknown1115	501	595	619	756	618	546	516	942	615	677
pgrna390	Neutral|unknown1115	487	408	536	881	477	385	919	1225	383	306
pgrna391	Neutral|unknown1115	1628	1649	1730	2009	1716	1511	1657	1611	2130	2486
pgrna392	Neutral|unknown1115	1140	1449	1175	1572	1245	1133	1167	1422	1340	1094
pgrna393	Neutral|unknown1115	2587	2863	2419	3516	2946	2632	2284	2769	3268	2872
pgrna394	Neutral|unknown1115	1208	1237	1379	1806	1389	1436	1384	1416	1292	1302
pgrna395	Neutral|unknown1115	2422	2654	2624	3355	2835	2731	2995	3147	3107	3271
pgrna396	Neutral|unknown1115	1569	1655	1804	2047	1843	1861	1793	1780	2046	2225
pgrna397	Neutral|unknown1115	2285	2408	2616	3232	2086	2403	2442	2729	2348	2823
pgrna398	Neutral|unknown1118	1236	1393	1398	2080	1743	1563	1490	1769	2195	1745
pgrna399	Neutral|unknown1118	1591	1637	1848	1984	1648	1574	2029	2669	1881	2345
pgrna400	Neutral|unknown1118	1830	2443	2197	3121	2258	2388	3191	3674	2640	3160
pgrna401	Neutral|unknown1118	2355	2470	2625	3576	2710	2440	2843	3732	2654	3080
pgrna402	Neutral|unknown1118	869	1272	1034	1276	1117	1003	1021	1032	969	831
pgrna403	Neutral|unknown1118	1326	1609	1710	1823	1510	1601	1500	1766	1775	2319
pgrna404	Neutral|unknown1119	1443	2092	1620	2265	1256	1312	1435	1875	1193	1198
pgrna405	Neutral|unknown1119	1892	1943	1869	2631	1751	1426	1534	2338	1777	1335
pgrna406	Neutral|unknown1119	1683	2101	1924	2157	2164	1822	2154	1906	1667	2086
pgrna407	Neutral|unknown1119	1225	1228	1288	1625	1257	1003	1468	1566	1094	966
pgrna408	Neutral|unknown1119	1265	1557	1328	1625	1259	1217	1108	1165	1237	1470
pgrna409	Neutral|unknown1119	1250	1308	1355	1634	1281	1285	1145	1709	1157	1070
pgrna410	Neutral|unknown1119	1895	2213	2091	2695	1894	1753	1899	1926	2349	1544
pgrna411	Neutral|unknown1119	1234	1491	1405	2090	1396	1142	1460	1656	1555	1548
pgrna412	Neutral|unknown1119	1366	1634	1332	1621	1415	1564	834	1351	1207	1948
pgrna413	Neutral|unknown1119	1959	2407	2471	3136	2281	1962	2163	2557	2187	2314
pgrna414	Neutral|unknown114	841	634	818	1146	614	779	564	774	584	730
pgrna415	Neutral|unknown114	1327	1512	1564	1965	1327	1288	1474	1676	1265	1502
pgrna416	Neutral|unknown114	990	1120	1123	1630	1402	1107	1360	1743	1753	1285
pgrna417	Neutral|unknown114	505	638	502	745	632	642	525	521	989	1361
pgrna418	Neutral|unknown114	1246	1234	1373	1836	1352	1146	1634	1856	1214	1510
pgrna419	Neutral|unknown114	1137	1397	1220	2013	1171	1228	1244	1214	1247	1303
pgrna420	Neutral|unknown114	1130	807	838	1263	674	640	923	951	946	838
pgrna421	Neutral|unknown114	1418	1706	1566	2281	1452	1275	1823	1843	1278	1391
pgrna422	Neutral|unknown114	1545	1807	1530	2171	1552	1489	1453	1777	1460	1249
pgrna423	Neutral|unknown114	1087	1309	1219	1341	1010	1188	1569	1162	1188	1120
pgrna424	Neutral|unknown119	1178	1568	1165	1478	1535	1453	1254	1772	1775	2313
pgrna425	Neutral|unknown119	986	1069	988	1201	1019	1072	926	1356	1684	2073
pgrna426	Neutral|unknown119	1282	1580	1314	1834	1373	1459	1248	1304	2018	1776
pgrna427	Neutral|unknown119	1532	1948	1702	2177	1865	1799	1574	1537	1663	1730
pgrna428	Neutral|unknown119	2421	2506	2913	3001	2295	2745	2707	3033	2110	3226
pgrna429	Neutral|unknown119	1253	1274	1287	1643	1127	1233	779	1060	872	1228
pgrna430	Neutral|unknown119	2184	2720	2085	3098	2223	2195	2038	2372	2902	2644
pgrna431	Neutral|unknown119	1425	1550	1392	1982	1285	1320	1235	1556	1112	1645
pgrna432	Neutral|unknown119	1808	2001	1742	2707	1851	1722	1387	1853	2596	2298
pgrna433	Neutral|unknown119	2584	2717	2461	3239	2122	2365	2520	2779	1714	1709
pgrna434	Neutral|unknown1243	620	616	564	722	844	609	669	861	931	1226
pgrna435	Neutral|unknown1243	1024	1037	1073	1525	1341	1038	1381	1077	2073	1913
pgrna436	Neutral|unknown1243	512	758	697	872	734	726	895	810	647	622
pgrna437	Neutral|unknown1243	460	670	508	761	596	483	504	788	777	528
pgrna438	Neutral|unknown1243	755	1052	769	925	934	655	760	939	787	639
pgrna439	Neutral|unknown1243	1173	1576	1492	1765	1501	1436	1665	1655	1456	1737
pgrna440	Neutral|unknown1243	796	826	955	1253	570	770	1419	1144	847	766
pgrna441	Neutral|unknown1243	730	838	914	1094	782	881	964	1416	564	749
pgrna442	Neutral|unknown1243	1742	1734	1794	2568	1555	1459	2369	2620	1886	1940
pgrna443	Neutral|unknown1243	1445	1458	1508	2197	1534	1407	1042	1403	2024	1671
pgrna444	Neutral|unknown1246	1551	1697	1524	2288	1572	1561	1172	1780	1752	1819
pgrna445	Neutral|unknown1246	2715	3072	3068	3681	2739	2574	3671	3955	2619	3147
pgrna446	Neutral|unknown1246	1438	1688	1727	2315	1503	1285	2507	2426	1320	1600
pgrna447	Neutral|unknown1246	1659	2239	1946	2627	2047	1879	2106	2630	2064	2155
pgrna448	Neutral|unknown1246	1479	1558	1411	1869	1666	1477	1443	974	1886	1665
pgrna449	Neutral|unknown1246	2152	2482	2507	2894	2098	2021	2624	2484	2197	2323
pgrna450	Neutral|unknown1246	1765	2053	1727	2429	2026	1810	1949	2479	2156	2466
pgrna451	Neutral|unknown1246	1584	1760	1995	2339	1439	1562	2620	2335	1542	1687
pgrna452	Neutral|unknown1246	2159	2557	2280	3000	2220	2143	1753	2181	1939	2068
pgrna453	Neutral|unknown1246	1557	2024	1642	2152	1818	1807	1755	2114	1928	2838
pgrna454	Neutral|unknown1248	1193	1547	1543	1808	1095	960	1385	1606	1280	1078
pgrna455	Neutral|unknown1248	951	1273	998	1800	1120	1227	1474	1392	1402	1422
pgrna456	Neutral|unknown1248	819	1071	885	1130	959	1023	636	814	651	841
pgrna457	Neutral|unknown1248	960	985	942	1185	929	1066	1128	978	1351	1513
pgrna458	Neutral|unknown1248	1215	1333	1181	1469	1066	1199	1322	1832	1392	1380
pgrna459	Neutral|unknown1248	974	1055	1135	1346	1131	803	783	871	1149	1079
pgrna460	Neutral|unknown1248	858	1109	834	1207	969	949	638	1024	883	1123
pgrna461	Neutral|unknown1248	918	1073	954	1365	1086	979	1010	1079	896	904
pgrna462	Neutral|unknown1248	757	864	834	1159	759	665	652	1002	618	793
pgrna463	Neutral|unknown1248	1100	1474	1143	1571	1287	982	1297	1023	1108	986
pgrna464	Neutral|unknown1249	1110	1369	1350	1390	1097	1176	1609	1879	1149	1186
pgrna465	Neutral|unknown1249	1570	1728	1767	2171	1844	1474	2066	1977	1783	1595
pgrna466	Neutral|unknown1249	1010	1025	930	1256	1261	1058	1147	1297	1256	1737
pgrna467	Neutral|unknown1249	1963	2232	2406	2750	1932	2227	2565	3023	3122	3768
pgrna468	Neutral|unknown1249	1237	1338	1513	1633	1276	1503	1234	1364	1371	1556
pgrna469	Neutral|unknown1249	890	915	1036	1059	679	874	823	922	569	621
pgrna470	Neutral|unknown1249	1154	1287	1257	1726	1129	1279	1269	1828	1629	1797
pgrna471	Neutral|unknown1249	2207	2732	2520	3354	2502	2643	2452	3254	2380	3121
pgrna472	Neutral|unknown1249	954	1005	1126	1176	921	969	937	880	1100	1227
pgrna473	Neutral|unknown1249	1163	1221	1419	1835	1071	1276	1991	2067	1252	1385
pgrna474	Neutral|unknown1479	1988	1857	1863	2654	1887	1639	2096	2751	2066	2224
pgrna475	Neutral|unknown1479	1411	1619	1588	1761	1490	1423	1543	1580	2259	2479
pgrna476	Neutral|unknown1479	1234	1586	1329	1697	1197	1071	1306	1397	993	1281
pgrna477	Neutral|unknown1479	1574	2104	1742	2234	1822	1667	1826	1642	2303	2356
pgrna478	Neutral|unknown1479	2233	2293	2214	2737	2474	2038	1937	2105	2190	2436
pgrna479	Neutral|unknown1479	2333	2438	2212	3204	1974	2285	2825	3118	2359	2483
pgrna480	Neutral|unknown1479	899	1125	873	1309	1153	936	1028	1460	1207	837
pgrna481	Neutral|unknown1479	2567	2746	2606	3319	2530	2257	2682	3340	2807	3173
pgrna482	Neutral|unknown1479	957	1237	1197	1529	916	967	1534	1568	703	1136
pgrna483	Neutral|unknown1479	1675	1544	1736	2523	1412	1624	1811	2020	1924	1825
pgrna484	Neutral|unknown1480	2915	2670	2494	3497	2491	2355	3094	3764	2701	3278
pgrna485	Neutral|unknown1480	1886	2297	2455	2863	2185	2257	2625	2649	2694	3265
pgrna486	Neutral|unknown1480	1619	1803	1473	1945	1522	1644	1435	1670	1194	1779
pgrna487	Neutral|unknown1480	1353	1503	1638	1901	1421	1396	1645	2355	1325	1605
pgrna488	Neutral|unknown1480	1646	1734	1297	2274	1465	1517	1052	1667	1376	1589
pgrna489	Neutral|unknown1480	2421	2427	2610	3540	2740	2522	2793	3365	3095	3257
pgrna490	Neutral|unknown1480	1045	1547	1474	1791	1309	1430	1156	1107	1667	1773
pgrna491	Neutral|unknown1480	1811	2072	1917	2375	1827	1764	2453	2584	2241	1839
pgrna492	Neutral|unknown1480	1954	2493	2258	3027	2263	2631	2370	2318	2864	3082
pgrna493	Neutral|unknown1480	1540	1829	1481	2498	1481	1456	1465	1714	1378	1640
pgrna494	Neutral|unknown1483	2536	2738	2638	3523	2842	2571	4375	4860	3689	2991
pgrna495	Neutral|unknown1483	1862	1903	2361	2761	1958	1867	2343	3229	2080	2250
pgrna496	Neutral|unknown1483	1588	1938	1699	2285	1743	1633	1734	1601	1804	1630
pgrna497	Neutral|unknown1483	1602	1364	1784	2479	1240	1316	2126	2528	1444	2174
pgrna498	Neutral|unknown1483	1145	1384	1204	1702	1157	1178	1057	1248	1116	1124
pgrna499	Neutral|unknown1483	1997	2343	2600	3227	2049	2047	3228	3016	2076	2453
pgrna500	Neutral|unknown1483	1185	1234	1699	1439	1121	1267	2021	1836	1380	1401
pgrna501	Neutral|unknown1483	1778	2181	2113	3051	2055	2060	2182	2225	2879	2139
pgrna502	Neutral|unknown1483	3151	3251	3467	4519	3192	3076	4146	3941	4420	4147
pgrna503	Neutral|unknown1483	2113	2559	2003	3169	2626	2511	2013	2412	2641	3622
pgrna504	Neutral|unknown1484	1153	1099	1217	1918	1291	1446	1552	1919	1871	2510
pgrna505	Neutral|unknown1484	1218	1459	1646	2041	1362	1163	2247	1813	1953	1643
pgrna506	Neutral|unknown1484	1916	1941	2047	2925	2136	1972	2412	2051	2190	2482
pgrna507	Neutral|unknown1484	2733	2684	3248	4435	2388	2497	4765	5186	2350	2710
pgrna508	Neutral|unknown1484	1646	1744	2193	2541	1715	1787	2745	3133	1989	1792
pgrna509	Neutral|unknown1484	1664	2001	2208	2847	1721	1853	2467	3259	1828	2040
pgrna510	Neutral|unknown1484	1873	1864	2175	2983	2145	1733	3008	3022	2515	2522
pgrna511	Neutral|unknown1484	2256	2045	2403	3315	2233	2032	3907	3581	2589	2919
pgrna512	Neutral|unknown1484	1798	1932	2207	2610	2079	2218	2388	3029	3001	3477
pgrna513	Neutral|unknown1484	1279	1343	1604	1659	1136	1046	1383	1604	1255	1600
pgrna514	Neutral|unknown1485	1826	2185	1995	2538	2011	1844	2457	2620	1841	2148
pgrna515	Neutral|unknown1485	1458	1614	1463	1849	1698	1588	1713	1695	2336	1899
pgrna516	Neutral|unknown1485	1478	1601	1849	2543	1578	1177	2187	2141	1932	1564
pgrna517	Neutral|unknown1485	1833	1694	1653	2270	1668	1585	1715	1686	1446	1595
pgrna518	Neutral|unknown1485	1132	1235	1055	1417	1023	894	1068	1449	1294	1161
pgrna519	Neutral|unknown1485	1321	1641	1741	2187	1554	1775	2147	2318	2209	2718
pgrna520	Neutral|unknown1485	1018	1356	1197	1443	855	1106	1642	1842	1005	870
pgrna521	Neutral|unknown1485	2713	3433	3423	4503	3176	2898	4192	4275	3966	4907
pgrna522	Neutral|unknown1485	1771	2038	2141	2588	1766	1578	1901	2169	1494	1621
pgrna523	Neutral|unknown1485	2222	2599	2421	3514	2479	2546	3477	3532	2945	3019
pgrna524	Neutral|unknown1486	1736	2151	1562	1957	1495	1646	1165	1415	1389	1276
pgrna525	Neutral|unknown1486	1672	2112	1735	2237	1507	1743	1274	1855	1314	1720
pgrna526	Neutral|unknown1486	2365	2473	2284	3362	2063	1900	2061	2606	1309	1986
pgrna527	Neutral|unknown1486	600	632	563	830	624	589	403	738	652	597
pgrna528	Neutral|unknown1486	1628	1953	1712	2575	1721	1749	1652	1951	2620	2537
pgrna529	Neutral|unknown1486	2260	2624	2246	2922	2394	2384	2484	2942	2460	2536
pgrna530	Neutral|unknown1486	1783	2117	1799	2157	1444	1615	1378	1898	1249	1828
pgrna531	Neutral|unknown1486	1372	1494	1335	2031	1211	1047	1278	2073	755	1501
pgrna532	Neutral|unknown1486	1140	1260	1196	1685	1357	1261	1425	1537	1315	1943
pgrna533	Neutral|unknown1486	1616	1739	1375	1902	1581	1571	1290	1596	2540	2964
pgrna534	Neutral|unknown1487	571	715	676	899	531	592	837	1165	441	720
pgrna535	Neutral|unknown1487	2801	2824	3157	4057	2637	2693	3447	3630	2578	2934
pgrna536	Neutral|unknown1487	1036	1203	1288	1645	962	893	1016	1320	777	1022
pgrna537	Neutral|unknown1487	1477	1800	1561	1805	1768	1667	1396	1225	1884	2224
pgrna538	Neutral|unknown1487	1170	1384	925	1415	1370	1353	915	1044	1584	1638
pgrna539	Neutral|unknown1487	561	691	615	985	692	687	1088	1083	709	751
pgrna540	Neutral|unknown1487	1469	1569	1671	1671	1142	1304	2278	2522	1224	1798
pgrna541	Neutral|unknown1487	1769	2038	1711	2211	1791	1625	1762	1910	1784	2099
pgrna542	Neutral|unknown1487	1940	2147	2372	2588	1932	1751	2884	2583	1962	1721
pgrna543	Neutral|unknown1487	1876	2261	2271	2955	2315	2325	2673	3139	3288	3470
pgrna544	Neutral|unknown1488	1487	1587	1511	1982	1262	1520	1876	1767	1727	1511
pgrna545	Neutral|unknown1488	3046	3478	3608	4506	3215	3037	3632	4499	3480	3828
pgrna546	Neutral|unknown1488	2090	2472	2320	2843	2128	2210	2029	2480	2378	2530
pgrna547	Neutral|unknown1488	2987	3131	3784	4430	2744	2603	3483	3958	2586	3855
pgrna548	Neutral|unknown1488	2418	2814	2653	3517	2581	2703	3942	3789	2458	2604
pgrna549	Neutral|unknown1488	1434	1428	1777	2127	1657	1648	2153	2238	1911	2008
pgrna550	Neutral|unknown1488	1926	1942	2740	2554	1997	1862	2385	2461	2605	2604
pgrna551	Neutral|unknown1488	1882	2384	2087	2672	1791	1621	2281	3068	1803	2017
pgrna552	Neutral|unknown1488	2008	2262	2206	2575	2190	2147	2250	2106	2577	3112
pgrna553	Neutral|unknown1488	2355	2680	2745	3331	2615	2634	3395	3382	2298	2746
pgrna554	Neutral|unknown1587	1199	1442	1401	2052	1337	1340	1206	1479	1205	1209
pgrna555	Neutral|unknown1587	1662	2029	1945	2416	2034	1934	2134	2462	2370	2350
pgrna556	Neutral|unknown1587	1258	1262	1754	2435	1386	1783	1671	2483	3560	3514
pgrna557	Neutral|unknown1587	1527	1581	1597	2112	1684	1531	1567	1584	1848	1925
pgrna558	Neutral|unknown1587	576	667	639	783	584	828	728	749	965	1169
pgrna559	Neutral|unknown1587	1064	1217	1295	1395	1121	964	1427	1098	996	1258
pgrna560	Neutral|unknown1587	1029	1121	1047	1382	950	1022	1389	1690	1105	1115
pgrna561	Neutral|unknown1587	1417	1609	1663	2075	1370	1430	1686	2125	1378	1361
pgrna562	Neutral|unknown1587	714	633	881	943	854	832	1088	792	1009	1079
pgrna563	Neutral|unknown1587	1030	1085	1034	1734	1056	1154	872	1262	1447	1754
pgrna564	Neutral|unknown1613	1471	1704	1263	1634	1362	1295	1020	1149	1065	1826
pgrna565	Neutral|unknown1613	961	1339	1245	1569	1370	1287	1022	1453	2130	2332
pgrna566	Neutral|unknown1613	1216	1497	1158	1615	1173	1077	1141	1343	1274	1431
pgrna567	Neutral|unknown1613	992	927	957	1350	977	841	1177	1192	726	948
pgrna568	Neutral|unknown1613	1638	2045	1909	2857	1848	1806	2222	2750	2330	2375
pgrna569	Neutral|unknown1613	1467	1492	2022	2632	1775	1538	2590	2430	1441	1655
pgrna570	Neutral|unknown1613	1200	1352	1125	1648	1134	1177	1040	1317	1249	1070
pgrna571	Neutral|unknown1613	669	1456	810	1096	910	966	833	846	1237	1562
pgrna572	Neutral|unknown1613	1214	1385	1175	1686	1228	1259	1422	1888	1311	1288
pgrna573	Neutral|unknown1613	1012	1353	1083	1479	1105	1155	1029	1515	1452	1355
pgrna574	Neutral|unknown1900	1310	1320	1573	1776	1383	1136	1775	2019	1256	1610
pgrna575	Neutral|unknown1900	2246	2200	2371	3329	1820	1912	2736	2525	1656	1738
pgrna576	Neutral|unknown1900	881	1095	1225	1382	1044	1305	845	1157	1434	1405
pgrna577	Neutral|unknown1900	1261	1359	1419	1940	979	1037	1717	1622	1347	1191
pgrna578	Neutral|unknown1900	1535	1699	2009	2358	1538	1736	2334	2422	1500	2382
pgrna579	Neutral|unknown1900	1886	1627	2024	2457	1877	1417	2101	2290	2150	2607
pgrna580	Neutral|unknown1900	1580	2188	1743	2561	2078	1897	1878	2330	1820	2272
pgrna581	Neutral|unknown1900	1497	1862	1695	1896	1405	1305	1848	1841	1012	1354
pgrna582	Neutral|unknown1900	2682	2672	2781	3538	2631	2960	4054	4089	3009	2709
pgrna583	Neutral|unknown1900	1253	1184	1537	2116	1253	1458	1697	2111	1743	1686
pgrna584	Neutral|unknown1905	1224	1714	1582	2035	1467	1610	2118	2149	1549	1672
pgrna585	Neutral|unknown1905	957	1349	1147	1577	1247	1041	971	1014	1359	990
pgrna586	Neutral|unknown1905	1214	1450	1196	1770	1277	1441	1202	1729	1896	1763
pgrna587	Neutral|unknown1905	1606	1986	1833	2020	1839	1808	1859	1901	2134	2131
pgrna588	Neutral|unknown1905	1317	1774	1391	2122	1702	1720	1666	2012	2298	2835
pgrna589	Neutral|unknown1905	1995	2225	2400	2786	1952	2081	2495	2994	2781	2804
pgrna590	Neutral|unknown1905	1594	1688	1777	2174	1442	1403	2159	2166	1297	1276
pgrna591	Neutral|unknown1905	1771	1950	2013	2531	1635	1794	2245	2530	1534	1920
pgrna592	Neutral|unknown1905	1289	1270	1443	1886	1262	1276	1563	2187	1491	1709
pgrna593	Neutral|unknown1905	1283	1568	1453	1846	1577	1689	1440	2168	1635	1459
pgrna594	Neutral|unknown2199	1768	2225	1979	2522	2195	2004	1703	2136	2510	2815
pgrna595	Neutral|unknown2199	908	1057	984	1376	954	974	1296	1612	1067	1157
pgrna596	Neutral|unknown2199	1320	1789	1452	1894	1307	1326	1624	1960	1525	1770
pgrna597	Neutral|unknown2199	1321	1492	1447	1636	1369	1391	2111	2238	1321	1754
pgrna598	Neutral|unknown2199	978	1068	1180	1689	1122	1016	1369	1680	1191	1803
pgrna599	Neutral|unknown2199	2091	2641	2569	3191	2465	2358	3029	3704	3011	3174
pgrna600	Neutral|unknown2199	1274	1691	1283	1842	1700	1455	1291	1351	2191	2355
pgrna601	Neutral|unknown2199	1570	1628	1745	2282	1593	1595	1726	1875	1662	1732
pgrna602	Neutral|unknown2199	1405	1587	1304	1945	1630	1370	1347	2064	1961	2226
pgrna603	Neutral|unknown2199	1643	1977	1801	2680	1737	1720	2225	2281	1851	1958
pgrna604	Neutral|unknown2201	977	1169	1052	1325	1105	998	1688	1494	1310	1604
pgrna605	Neutral|unknown2201	1643	1606	1846	2256	1710	1707	2062	2212	2035	1984
pgrna606	Neutral|unknown2201	1109	1193	1152	1800	1317	1290	1106	1667	1163	1389
pgrna607	Neutral|unknown2201	1532	1795	1592	1926	1489	1507	1299	1596	1360	2437
pgrna608	Neutral|unknown2201	1581	1806	1846	2635	1765	1536	2518	2961	1659	1680
pgrna609	Neutral|unknown2201	1526	1513	1707	2019	1570	1791	1704	1896	2039	1742
pgrna610	Neutral|unknown2201	1346	1638	1710	2172	1710	1636	2159	2353	4019	3937
pgrna611	Neutral|unknown2201	1600	1804	2145	2743	1694	1766	2358	2869	2058	2376
pgrna612	Neutral|unknown2201	1538	1613	1828	2003	1825	1217	1545	1604	2037	1707
pgrna613	Neutral|unknown2201	1251	1425	1570	1932	1297	1347	1620	1550	1690	1359
pgrna614	Neutral|unknown2204	2331	2661	2359	3528	2316	2210	2669	2962	1803	2374
pgrna615	Neutral|unknown2204	2216	2562	1834	3022	2166	2326	1915	2234	3017	2550
pgrna616	Neutral|unknown2204	1350	1297	1422	1841	1057	1576	1472	1528	1392	2701
pgrna617	Neutral|unknown2205	884	925	913	1306	885	835	1264	1337	1594	1704
pgrna618	Neutral|unknown2205	2224	2137	2419	2966	1879	1946	2522	2530	1464	1767
pgrna619	Neutral|unknown2205	1171	1058	1120	1658	1143	869	1268	1436	888	933
pgrna620	Neutral|unknown2205	1260	1329	1358	1973	1423	1108	1425	2299	1953	1740
pgrna621	Neutral|unknown2205	1776	2262	2240	2618	1707	1820	2199	2000	1352	2031
pgrna622	Neutral|unknown2205	1348	1346	1411	1977	1422	1610	1816	1724	1970	2831
pgrna623	Neutral|unknown2205	830	947	913	1166	1067	987	953	999	943	912
pgrna624	Neutral|unknown2205	463	504	525	755	513	366	568	437	339	435
pgrna625	Neutral|unknown2205	1710	1419	1734	2382	1279	1369	2105	2327	1767	2035
pgrna626	Neutral|unknown2205	2425	2353	2830	3475	2135	2195	3159	4427	2991	2639
pgrna627	Neutral|unknown2342	1340	1688	1219	1870	1656	1573	1243	1269	1495	1657
pgrna628	Neutral|unknown2342	1980	2507	2311	2388	2145	1877	2257	2901	1860	2463
pgrna629	Neutral|unknown2342	863	1004	1122	1218	859	874	1160	1056	932	828
pgrna630	Neutral|unknown2342	2229	2298	2189	2709	2009	2076	2319	2676	2288	2406
pgrna631	Neutral|unknown2342	1415	1355	1366	1689	1187	1288	1205	1518	1424	1379
pgrna632	Neutral|unknown2342	1605	1483	1660	2112	1495	1328	1537	1664	1802	1759
pgrna633	Neutral|unknown2342	1556	1839	1608	2099	1624	1849	1777	2202	2040	2331
pgrna634	Neutral|unknown2342	1030	1544	1226	1532	1327	1352	1562	1915	1502	1856
pgrna635	Neutral|unknown2342	1761	1835	1610	2083	1453	1602	1993	2144	1434	1504
pgrna636	Neutral|unknown2342	1759	2135	1882	2361	1763	1733	1865	2225	2005	1954
pgrna637	Neutral|unknown2345	759	874	765	943	813	842	1113	927	1034	1045
pgrna638	Neutral|unknown2345	1446	1792	1819	2191	1458	1472	1424	1972	1554	1559
pgrna639	Neutral|unknown2345	1677	1880	1919	2546	1823	1659	1827	1988	1645	1982
pgrna640	Neutral|unknown2345	1373	1905	1290	1751	1883	1582	1828	1491	1839	2028
pgrna641	Neutral|unknown2345	729	752	644	951	737	759	628	878	1333	1525
pgrna642	Neutral|unknown2345	1080	1061	1539	1542	1114	1012	1603	1435	921	915
pgrna643	Neutral|unknown2345	1286	1616	1414	1689	1384	1577	1171	1535	1182	1046
pgrna644	Neutral|unknown2370	1237	1545	1384	1726	1375	1379	1735	1687	1169	1560
pgrna645	Neutral|unknown2370	2677	2819	2829	3965	3200	2566	4538	5256	3500	3167
pgrna646	Neutral|unknown2370	2257	2170	2898	3243	2117	2231	2831	3153	2123	2186
pgrna647	Neutral|unknown2370	987	1280	1172	1393	1127	1028	1048	1172	1274	1054
pgrna648	Neutral|unknown2370	1735	2021	2125	2517	1986	2006	2658	2350	2447	2576
pgrna649	Neutral|unknown2370	1321	1524	1811	2120	1742	1468	2044	1883	1666	1723
pgrna650	Neutral|unknown2370	1366	1465	1585	2023	1507	1427	2686	2166	1567	1836
pgrna651	Neutral|unknown2370	1604	1746	1740	2039	1663	1526	1698	1894	2008	1847
pgrna652	Neutral|unknown2370	1370	1521	1476	1691	1292	1281	1429	1839	1153	1350
pgrna653	Neutral|unknown2370	1118	1333	1371	1525	1315	1292	1389	1545	1499	1271
pgrna654	Neutral|unknown2372	1410	1662	1676	1894	1492	1276	1546	2332	1055	1484
pgrna655	Neutral|unknown2372	1106	976	1356	1600	974	928	1938	1957	1156	1001
pgrna656	Neutral|unknown2372	1179	1432	1446	1775	1372	1273	1421	1622	1562	1770
pgrna657	Neutral|unknown2372	1216	1291	1448	2036	1397	1161	1568	1964	1077	1494
pgrna658	Neutral|unknown2372	1093	1223	1261	1467	847	867	958	1160	795	839
pgrna659	Neutral|unknown2372	1497	1701	1538	2272	1698	1560	1584	1363	1191	1269
pgrna660	Neutral|unknown2372	1359	1616	1721	2443	1673	1430	2121	2082	2115	2038
pgrna661	Neutral|unknown2372	1507	1700	1764	2280	1669	1955	1821	2402	2614	2823
pgrna662	Neutral|unknown2372	1280	1241	1556	2241	1198	1169	3433	3185	1535	1869
pgrna663	Neutral|unknown2372	1275	1505	1505	1923	1337	1140	1361	1448	988	874
pgrna664	Neutral|unknown2374	1726	1712	1901	2546	1656	1760	1882	2419	1901	2859
pgrna665	Neutral|unknown2374	1878	2070	2238	2375	1970	2068	2711	2789	1966	2099
pgrna666	Neutral|unknown2374	1347	1505	1410	1750	1701	1481	1435	1794	1916	1628
pgrna667	Neutral|unknown2374	1385	1462	1459	1885	1439	1469	1378	1799	1933	2029
pgrna668	Neutral|unknown2374	1108	1230	1180	1567	1194	1304	1148	1139	1695	1845
pgrna669	Neutral|unknown2374	1455	1494	1620	1926	1234	1247	1569	1824	1266	2031
pgrna670	Neutral|unknown2374	1010	1231	1219	1977	1111	1160	1381	1904	1242	1342
pgrna671	Neutral|unknown2374	728	992	966	1272	851	739	1106	933	724	547
pgrna672	Neutral|unknown2374	1152	1291	1212	1539	1438	1392	1307	1634	1733	2388
pgrna673	Neutral|unknown2374	1253	1422	1467	1541	1596	1571	1156	1394	1708	2198
pgrna674	Neutral|unknown2375	1560	1760	1607	2203	1647	1748	2096	2579	1816	1792
pgrna675	Neutral|unknown2375	1284	1460	1465	1929	1461	1198	1298	1572	1413	1466
pgrna676	Neutral|unknown2375	1070	1016	1256	1377	1014	960	1156	1391	927	1003
pgrna677	Neutral|unknown2375	1374	1372	1533	1655	1295	1141	1821	2126	928	1038
pgrna678	Neutral|unknown2375	1139	1129	1318	1437	871	830	1297	1790	793	732
pgrna679	Neutral|unknown2375	1635	1931	2030	2348	1841	1721	1965	2218	1628	1612
pgrna680	Neutral|unknown2375	1791	2017	2106	2994	2162	1839	2640	3245	3695	3259
pgrna681	Neutral|unknown2375	2089	2445	2189	2452	2130	2221	2278	2551	2579	2676
pgrna682	Neutral|unknown2375	1400	1253	1864	2052	1389	1334	2123	2008	1110	1258
pgrna683	Neutral|unknown2375	858	938	730	958	824	754	689	720	994	1142
pgrna684	Neutral|unknown2376	2451	2643	2456	3253	2248	2809	3294	3008	2286	3500
pgrna685	Neutral|unknown2376	1771	1869	1802	2802	2120	2072	2229	2675	2138	2614
pgrna686	Neutral|unknown2376	1408	1463	1308	1927	1492	1359	1717	2191	1943	1901
pgrna687	Neutral|unknown2376	1337	1669	2087	2038	1668	1691	1682	1978	1592	1704
pgrna688	Neutral|unknown2376	1844	1796	2162	3289	1835	1900	2732	3433	1575	2318
pgrna689	Neutral|unknown2376	2300	2859	2381	3754	2848	2706	2793	3279	2959	3151
pgrna690	Neutral|unknown2376	2487	2357	2142	2934	2127	2342	2716	2816	2394	2222
pgrna691	Neutral|unknown2376	1718	2189	2011	2557	1770	2107	2080	1759	2183	2669
pgrna692	Neutral|unknown2376	1520	1836	1789	2358	1648	1723	1544	1804	1679	1886
pgrna693	Neutral|unknown2376	2357	2970	2589	3060	2576	2769	2892	3326	2830	3108
pgrna694	Neutral|unknown2377	1780	1672	1696	2224	1589	1424	1449	2267	1462	2109
pgrna695	Neutral|unknown2377	1365	1435	1069	1650	1244	1148	1121	1169	1409	1144
pgrna696	Neutral|unknown2377	1092	1211	1301	1514	1092	975	1233	1423	962	1059
pgrna697	Neutral|unknown2377	1498	1678	1534	1681	1366	1379	1176	1522	1056	1181
pgrna698	Neutral|unknown2377	1978	2432	1899	2326	2112	1836	1322	1549	1572	2050
pgrna699	Neutral|unknown2377	1936	2174	2054	2446	1859	1890	2153	2769	3025	2531
pgrna700	Neutral|unknown2377	1115	1200	1195	1782	1002	1060	1633	1609	919	1015
pgrna701	Neutral|unknown2377	1861	2117	2101	2173	1738	1845	1867	1502	1674	1707
pgrna702	Neutral|unknown2377	1140	1213	1161	1325	1048	1077	1085	1006	963	1121
pgrna703	Neutral|unknown2377	2216	2255	2291	3210	2258	2249	2602	3239	2303	3027
pgrna704	Neutral|unknown2578	1311	1601	1426	2076	1504	1369	1346	1880	1235	1201
pgrna705	Neutral|unknown2578	1141	1462	1380	1690	1670	1387	1400	1960	1832	2155
pgrna706	Neutral|unknown2578	1464	1333	1880	2325	1460	1329	2218	2934	1141	1526
pgrna707	Neutral|unknown2578	1013	1046	1145	1310	902	1014	693	901	758	829
pgrna708	Neutral|unknown2578	1519	1544	1583	2054	1303	1404	1793	1795	1510	1611
pgrna709	Neutral|unknown2578	1618	1617	1782	1968	1566	1451	1415	1754	2084	2169
pgrna710	Neutral|unknown2578	809	740	650	852	810	606	617	903	688	474
pgrna711	Neutral|unknown2578	1539	1970	1792	2118	1920	1652	1300	1404	1885	2226
pgrna712	Neutral|unknown2578	1565	2040	1966	2494	1869	1959	2056	2020	2226	2596
pgrna713	Neutral|unknown2578	1085	750	1009	1625	1030	899	1317	1829	1215	1334
pgrna714	Neutral|unknown2590	535	794	673	1026	763	871	1117	1096	1276	1468
pgrna715	Neutral|unknown2590	1965	2198	2485	2842	1955	1790	4636	4894	2508	2465
pgrna716	Neutral|unknown2590	1104	1265	1533	1817	1416	1361	2080	1682	1618	1574
pgrna717	Neutral|unknown2590	1032	1213	1165	1724	1135	1152	1348	1308	1059	1026
pgrna718	Neutral|unknown2590	1615	1778	1377	2193	1619	1814	1721	2405	2169	2529
pgrna719	Neutral|unknown2590	723	845	991	1306	857	771	1110	1727	782	1037
pgrna720	Neutral|unknown2590	890	979	1078	1439	1249	899	1649	2109	1126	1194
pgrna721	Neutral|unknown2590	1505	1626	1841	2153	1734	1647	2147	1953	1839	2364
pgrna722	Neutral|unknown2590	1117	1258	1187	1711	1409	1488	1463	1543	2070	2452
pgrna723	Neutral|unknown2590	827	796	836	1015	713	656	948	1077	422	724
pgrna724	Neutral|unknown2593	1877	2004	1755	2548	1712	1650	2034	2454	1436	1405
pgrna725	Neutral|unknown2593	1454	1856	1674	2020	1448	1538	1490	1881	1426	1681
pgrna726	Neutral|unknown2593	1783	2289	2025	2731	2029	1843	2454	2554	2528	2439
pgrna727	Neutral|unknown2593	1776	2184	1691	2293	1777	2509	1854	2239	2679	3022
pgrna728	Neutral|unknown2593	1600	1795	1809	2317	1537	1324	1734	1760	1207	1572
pgrna729	Neutral|unknown2593	1665	1674	2130	2613	1620	1498	3555	4486	2136	1883
pgrna730	Neutral|unknown2593	2020	2240	2541	3576	2330	1850	3306	3895	2243	2225
pgrna731	Neutral|unknown2593	1741	2100	1809	2553	2287	2105	2080	2619	2675	3381
pgrna732	Neutral|unknown2593	1686	1968	1801	2247	1659	1666	2078	1969	1671	2561
pgrna733	Neutral|unknown2593	1723	1883	1960	2500	1874	1658	2425	2333	2250	2607
pgrna734	Neutral|unknown2620	1103	1005	1145	1312	811	867	995	1430	721	825
pgrna735	Neutral|unknown2620	921	898	864	1021	638	786	916	617	475	699
pgrna736	Neutral|unknown2620	1372	1547	1534	1987	1339	1125	2028	2254	1481	1643
pgrna737	Neutral|unknown2620	1182	1171	948	1814	1060	1076	1250	1587	1710	2082
pgrna738	Neutral|unknown2620	1514	1628	1564	1697	1325	1369	1236	1629	1364	1107
pgrna739	Neutral|unknown2620	831	909	789	1168	748	775	721	1360	755	810
pgrna740	Neutral|unknown2620	1608	1789	1880	2174	1742	1540	1407	1682	1936	1695
pgrna741	Neutral|unknown2620	1341	1757	1596	1808	1768	1707	1412	2032	2126	2192
pgrna742	Neutral|unknown2620	765	726	732	1129	626	748	723	894	573	648
pgrna743	Neutral|unknown2620	1276	1484	1260	1687	1311	1490	1239	1355	1636	1597
pgrna744	Neutral|unknown264	1227	1384	1382	1631	1441	1133	1351	1127	1175	1542
pgrna745	Neutral|unknown264	1258	1306	1353	1740	1136	1148	1077	1404	1073	1573
pgrna746	Neutral|unknown264	1649	1718	1695	2225	1661	1604	2007	1970	1496	2101
pgrna747	Neutral|unknown264	1893	2007	1884	2618	1811	1981	1963	2450	2615	2634
pgrna748	Neutral|unknown264	1306	1515	1519	1775	1173	1273	1463	1915	989	979
pgrna749	Neutral|unknown264	1571	1989	1450	2077	1666	1818	2302	1938	1469	2065
pgrna750	Neutral|unknown264	1281	1358	1376	1638	1198	1238	1776	1674	1193	1253
pgrna751	Neutral|unknown264	1821	1694	1681	2205	1403	1287	1824	2313	1066	1207
pgrna752	Neutral|unknown264	1352	1767	1507	2075	1724	1565	1280	1743	1374	1599
pgrna753	Neutral|unknown264	1280	1646	1535	1729	1418	1473	1382	1364	1465	1981
pgrna754	Neutral|unknown265	1544	1680	1591	2006	1380	1392	1368	1862	1604	1825
pgrna755	Neutral|unknown265	1058	987	1105	1458	861	899	1144	1762	795	708
pgrna756	Neutral|unknown265	645	708	733	1088	658	779	923	1762	1411	1588
pgrna757	Neutral|unknown265	1051	1276	1201	1816	1204	1322	1517	1519	1193	1409
pgrna758	Neutral|unknown265	1666	2147	1959	2528	2070	2022	1989	2118	1826	2008
pgrna759	Neutral|unknown265	594	817	676	865	707	815	589	652	1446	1274
pgrna760	Neutral|unknown265	819	853	709	1043	694	818	644	687	747	1178
pgrna761	Neutral|unknown265	593	607	884	1089	596	478	986	1136	413	409
pgrna762	Neutral|unknown265	425	531	418	460	496	478	587	388	425	457
pgrna763	Neutral|unknown265	2191	2298	2544	3524	2337	2426	2796	2932	3197	2892
pgrna764	Neutral|unknown271	1716	1783	1711	2228	1425	1555	2321	2373	1823	2253
pgrna765	Neutral|unknown271	1455	1721	1722	2120	1733	1298	1408	1742	1175	1215
pgrna766	Neutral|unknown271	1524	1516	1669	2237	1495	1619	1662	1638	1566	1587
pgrna767	Neutral|unknown271	2102	2187	2297	2799	2136	1992	2857	2638	2351	2337
pgrna768	Neutral|unknown271	1493	1413	1757	2242	1094	1301	1663	2086	1398	1578
pgrna769	Neutral|unknown271	1618	1821	1587	2212	1712	1232	1722	1708	1623	1407
pgrna770	Neutral|unknown271	1289	1487	1588	1895	1461	1348	2264	2114	1629	1660
pgrna771	Neutral|unknown271	1878	2051	2067	2686	1901	2089	2766	2756	2459	1838
pgrna772	Neutral|unknown271	1477	1947	1754	2056	1539	1786	2491	2239	1877	1609
pgrna773	Neutral|unknown271	1765	1700	2015	2503	1671	1587	2268	2698	2113	2009
pgrna774	Neutral|unknown273	799	858	983	1101	794	831	1016	1133	935	1035
pgrna775	Neutral|unknown273	1039	1401	1376	1781	1656	1360	1480	1298	1511	2175
pgrna776	Neutral|unknown273	1163	1170	1253	1753	1176	1132	1024	1824	1508	1954
pgrna777	Neutral|unknown273	1453	1637	1651	2053	2003	1862	2170	2502	4230	3206
pgrna778	Neutral|unknown273	1499	1470	1357	2319	1435	1426	1433	1667	1783	1438
pgrna779	Neutral|unknown273	1206	1279	1473	1749	1318	1219	1754	1927	1565	1372
pgrna780	Neutral|unknown273	1355	1693	1602	2056	1480	1657	1337	2014	2082	1772
pgrna781	Neutral|unknown273	1536	1493	1998	2175	1675	1652	1899	2483	2651	2227
pgrna782	Neutral|unknown273	1591	1701	1667	2331	1676	1630	2181	2426	2676	2267
pgrna783	Neutral|unknown273	1649	2095	2005	2785	1888	1799	2458	3075	2832	2920
pgrna784	Neutral|unknown274	2224	2123	2182	3350	1687	1612	1813	2527	1232	1590
pgrna785	Neutral|unknown274	1182	1282	1319	1618	1196	1094	1330	1404	1449	1850
pgrna786	Neutral|unknown274	1473	1491	1867	2410	1572	1493	2100	2023	3116	2800
pgrna787	Neutral|unknown274	1985	2377	2125	3148	2135	1989	2577	2621	2401	2971
pgrna788	Neutral|unknown274	1156	1424	1720	1740	1315	1192	1546	2173	1529	1794
pgrna789	Neutral|unknown274	1300	1418	1320	1872	1261	1099	1529	1740	1189	1134
pgrna790	Neutral|unknown274	1742	2112	1692	2340	2145	1927	1726	2222	1834	2384
pgrna791	Neutral|unknown274	1729	2086	1935	2403	2025	1744	2173	2387	2473	2667
pgrna792	Neutral|unknown274	1409	1719	1460	2035	1433	1271	2273	2104	1381	1759
pgrna793	Neutral|unknown274	1740	1893	1834	2114	1570	1631	2274	1917	1902	1640
pgrna794	Neutral|unknown275	921	1075	944	1486	988	890	1008	1407	1078	1006
pgrna795	Neutral|unknown275	2373	2761	2432	3124	2018	2124	2220	2826	1998	2632
pgrna796	Neutral|unknown275	1012	1191	1314	1607	1331	996	1812	1674	965	1509
pgrna797	Neutral|unknown275	2882	3520	2892	4170	2767	2801	3761	4128	3226	3585
pgrna798	Neutral|unknown275	1107	1370	1219	1853	1248	1212	1849	1935	1009	1182
pgrna799	Neutral|unknown275	1967	2416	2072	3189	2403	2137	2498	2703	2118	2031
pgrna800	Neutral|unknown275	946	1130	1093	1408	869	872	1110	1707	530	632
pgrna801	Neutral|unknown275	2749	2577	2662	3223	2390	2430	2238	2776	1887	2661
pgrna802	Neutral|unknown275	1157	1251	1166	1442	710	852	1235	1384	458	581
pgrna803	Neutral|unknown275	1942	1689	1844	2388	1943	1779	2262	2604	2884	2544
pgrna804	Neutral|unknown276	1841	2267	2489	2969	2204	2294	3855	3582	2607	2498
pgrna805	Neutral|unknown276	2190	2498	2395	2673	2550	2477	2306	2603	3332	3412
pgrna806	Neutral|unknown276	1451	1740	1526	2230	1595	1474	1441	1473	1841	2214
pgrna807	Neutral|unknown276	2171	2361	2619	2731	2279	2346	2103	2894	2478	3733
pgrna808	Neutral|unknown276	1685	2089	1952	2595	1561	1803	1318	2120	1443	1903
pgrna809	Neutral|unknown276	1999	2440	2153	2761	2014	2179	2359	2630	1825	2488
pgrna810	Neutral|unknown276	1559	1951	1725	2293	2071	1848	2061	2248	2119	2279
pgrna811	Neutral|unknown276	2244	2650	2555	3730	2551	2780	3455	2934	3296	3801
pgrna812	Neutral|unknown276	2619	2753	3230	4674	2736	2578	3338	3449	3501	3616
pgrna813	Neutral|unknown276	1727	1940	1717	2265	1659	1692	1395	2172	1765	2071
pgrna814	Neutral|unknown278	578	744	728	1189	936	889	1078	1504	1188	1178
pgrna815	Neutral|unknown278	1029	1401	928	1417	1261	1158	1827	1504	1020	1179
pgrna816	Neutral|unknown278	508	607	617	945	514	595	368	397	545	579
pgrna817	Neutral|unknown278	742	602	537	948	759	854	357	825	960	960
pgrna818	Neutral|unknown278	852	776	740	1042	670	568	796	841	464	522
pgrna819	Neutral|unknown278	494	801	495	799	820	914	579	913	678	1024
pgrna820	Neutral|unknown278	1434	1597	1499	1974	1531	1674	2220	2120	1889	1520
pgrna821	Neutral|unknown278	739	791	920	1109	808	789	933	868	1186	1899
pgrna822	Neutral|unknown278	1538	1883	2058	2000	1616	1677	1748	1955	1484	1694
pgrna823	Neutral|unknown278	2793	2905	3240	3907	2591	3067	3632	3731	3217	5004
pgrna824	Neutral|unknown2804	330	351	394	584	311	316	318	502	505	414
pgrna825	Neutral|unknown2804	1617	1759	1817	2559	1826	1517	2126	1926	2638	1930
pgrna826	Neutral|unknown2804	764	811	815	1279	722	822	1510	1472	765	830
pgrna827	Neutral|unknown2804	456	503	529	931	563	496	926	685	942	819
pgrna828	Neutral|unknown2804	398	442	512	759	475	463	604	589	502	520
pgrna829	Neutral|unknown2804	342	352	405	515	384	362	482	493	427	480
pgrna830	Neutral|unknown2804	1742	1738	1745	1926	1713	1469	2381	1979	1627	1959
pgrna831	Neutral|unknown2804	1831	2107	2210	2750	2232	1909	2940	3488	2842	2350
pgrna832	Neutral|unknown2804	1601	1970	1998	2546	1866	1765	2470	2263	2227	2309
pgrna833	Neutral|unknown2804	940	1023	995	1450	1051	974	1045	1405	1414	1251
pgrna834	Neutral|unknown2805	1618	2010	1682	2631	2196	1913	2516	2934	2869	2887
pgrna835	Neutral|unknown2805	603	794	807	1398	693	811	762	1211	1780	2366
pgrna836	Neutral|unknown2805	1368	1227	1861	2583	1198	1304	1661	1935	1056	1347
pgrna837	Neutral|unknown2805	840	858	830	996	734	705	787	959	893	1381
pgrna838	Neutral|unknown2805	1170	1375	1551	1854	1403	1514	2485	2376	1774	1789
pgrna839	Neutral|unknown2805	922	1189	1060	1556	962	1217	1273	1600	1412	1487
pgrna840	Neutral|unknown2805	1397	1441	1336	1600	1209	1212	1744	1785	996	1513
pgrna841	Neutral|unknown2805	2424	2697	2330	3123	2543	2353	2133	2839	2960	3290
pgrna842	Neutral|unknown2805	881	974	1065	1395	1143	1938	1839	1806	1463	2753
pgrna843	Neutral|unknown2805	1595	1904	1728	2309	1797	1775	1993	2417	2353	1931
pgrna844	Neutral|unknown288	428	469	431	549	382	409	671	860	444	330
pgrna845	Neutral|unknown288	1016	1009	1043	1731	859	946	1503	2060	923	1063
pgrna846	Neutral|unknown288	912	859	994	1770	762	861	1089	1699	1001	994
pgrna847	Neutral|unknown288	771	663	795	1016	599	589	938	1001	699	847
pgrna848	Neutral|unknown288	784	873	839	1368	602	853	865	1049	657	936
pgrna849	Neutral|unknown288	1096	1437	1380	1941	1167	1419	1404	1365	1639	2039
pgrna850	Neutral|unknown288	2543	2937	2765	3527	2751	2340	4123	4511	2383	2371
pgrna851	Neutral|unknown288	1819	2022	2242	2812	1985	1968	2384	2925	1933	2280
pgrna852	Neutral|unknown288	270	482	372	614	484	532	420	615	683	1183
pgrna853	Neutral|unknown288	1081	1227	1235	1792	958	1078	1616	1661	1106	1607
pgrna854	Neutral|unknown291	2305	2367	2721	3837	2024	2135	3103	3196	2016	2812
pgrna855	Neutral|unknown291	2554	2817	2833	4377	2206	2152	3188	3928	3020	3018
pgrna856	Neutral|unknown291	2477	2696	2786	3902	2420	2451	4574	4634	2499	3040
pgrna857	Neutral|unknown291	1832	2201	2038	2363	1994	2006	1974	2326	2113	2334
pgrna858	Neutral|unknown291	1660	2146	1946	2384	1724	1818	2073	2317	2736	2241
pgrna859	Neutral|unknown291	2048	2355	2193	2885	1975	1830	2361	2850	2042	2250
pgrna860	Neutral|unknown291	1754	1913	1793	2357	1773	1503	1764	1776	1334	1715
pgrna861	Neutral|unknown291	1637	2049	2054	2079	1748	1622	2087	1956	2283	2079
pgrna862	Neutral|unknown291	2591	2687	2448	3692	2490	2622	2645	2683	2495	2885
pgrna863	Neutral|unknown291	1799	1903	1558	2350	1602	1550	1922	2076	1217	1712
pgrna864	Neutral|unknown3099	634	702	829	1066	540	646	930	803	764	1109
pgrna865	Neutral|unknown3099	3255	3768	4030	4726	3413	3090	4707	4862	4357	4352
pgrna866	Neutral|unknown3099	2195	2831	2862	3621	2633	2857	3581	3901	2373	3284
pgrna867	Neutral|unknown3099	485	561	532	671	606	537	906	908	727	549
pgrna868	Neutral|unknown3099	752	997	918	853	1025	909	718	1117	1188	1275
pgrna869	Neutral|unknown3099	1639	1839	1720	2218	1960	1507	2010	2169	2277	2323
pgrna870	Neutral|unknown3099	634	755	581	966	644	566	990	753	902	631
pgrna871	Neutral|unknown3099	1493	1638	1856	2182	1588	1500	1950	2342	2223	2447
pgrna872	Neutral|unknown3099	1714	2115	2093	2776	2008	1867	3062	3001	2704	2682
pgrna873	Neutral|unknown3099	1710	1917	1929	2629	1961	1923	2094	2116	2945	2808
pgrna874	Neutral|unknown462	1976	2029	2304	2898	1909	1876	2716	2679	2175	2142
pgrna875	Neutral|unknown462	1036	992	1056	1341	1046	995	1003	1172	1288	1024
pgrna876	Neutral|unknown462	1867	2060	2511	2899	1877	1845	3279	2779	1721	2116
pgrna877	Neutral|unknown462	1860	1962	1899	2538	1689	1486	1944	2346	1760	1597
pgrna878	Neutral|unknown462	1914	2064	1994	2770	1656	1644	2399	2295	1726	1565
pgrna879	Neutral|unknown462	833	1056	676	1124	1095	941	683	911	1134	900
pgrna880	Neutral|unknown462	1658	1922	1852	2347	1674	1736	2388	2093	2072	1894
pgrna881	Neutral|unknown462	1933	2452	2311	2734	1847	2126	2766	2457	2216	2991
pgrna882	Neutral|unknown464	1224	1444	1623	1946	1327	1174	1755	2036	1378	1606
pgrna883	Neutral|unknown464	2702	2902	3401	3723	2732	2945	3452	3945	3059	3452
pgrna884	Neutral|unknown464	1911	2272	2026	3032	2135	2099	2938	3049	2038	2539
pgrna885	Neutral|unknown464	1556	1990	1695	2504	1635	1963	2015	1742	3588	3827
pgrna886	Neutral|unknown464	1288	1286	1039	1633	1321	1164	1169	1490	1930	1675
pgrna887	Neutral|unknown464	2080	2326	2476	2867	1963	2085	2741	2819	1710	1950
pgrna888	Neutral|unknown464	2281	2513	2811	3482	2724	2367	3083	2961	4412	4519
pgrna889	Neutral|unknown464	2110	2139	2075	2437	2115	2109	2267	2118	2680	3030
pgrna890	Neutral|unknown464	2585	2620	2726	3452	2575	2339	2631	3177	3138	3356
pgrna891	Neutral|unknown464	1294	1542	1432	2040	1535	1193	1615	1922	1735	1817
pgrna892	Neutral|unknown465	1211	1270	1233	1727	1325	1502	1657	1744	2091	2133
pgrna893	Neutral|unknown465	1742	2062	2201	3035	2183	2046	2738	3755	2917	3093
pgrna894	Neutral|unknown465	1095	1324	1256	1444	1050	1138	1511	1362	1223	1140
pgrna895	Neutral|unknown465	2764	3163	3260	3815	3366	3390	3232	3427	3166	4344
pgrna896	Neutral|unknown465	2962	3152	3582	4418	3143	2729	3925	3466	4031	4014
pgrna897	Neutral|unknown465	542	889	644	960	691	672	755	1107	630	578
pgrna898	Neutral|unknown465	2295	2388	2625	3162	2156	2188	2946	3105	2531	2557
pgrna899	Neutral|unknown465	565	665	960	863	727	773	1174	1176	779	932
pgrna900	Neutral|unknown465	1691	1995	2071	2127	2014	1730	2208	2359	1496	2122
pgrna901	Neutral|unknown465	2835	3420	3027	4033	2741	2926	2963	2921	2318	2682
pgrna902	Neutral|unknown466	2151	2458	2502	3113	2380	2275	3864	3302	2764	2700
pgrna903	Neutral|unknown466	2568	2483	2661	3703	2689	2042	3019	3457	2758	2901
pgrna904	Neutral|unknown466	1550	2029	1896	2477	2273	2135	1944	2580	3686	3526
pgrna905	Neutral|unknown466	2717	2814	2609	3624	2676	2434	2982	3371	3959	4488
pgrna906	Neutral|unknown466	1877	1864	2241	2637	2112	1952	2799	2506	1839	2195
pgrna907	Neutral|unknown466	1755	2077	1981	2412	2105	1888	2672	2479	2053	1961
pgrna908	Neutral|unknown466	1381	1462	1489	1815	1273	1356	1435	1768	1187	1082
pgrna909	Neutral|unknown466	1572	1649	1635	2046	1432	1671	1819	1954	1462	1990
pgrna910	Neutral|unknown466	1646	1691	1505	2165	1631	1586	1530	2061	1148	1901
pgrna911	Neutral|unknown466	2313	2352	2345	3440	2487	2245	2912	2827	2732	2830
pgrna912	Neutral|unknown475	786	880	728	903	1066	815	783	898	1050	914
pgrna913	Neutral|unknown475	1387	1469	1538	2167	1320	1116	2374	2155	1446	1630
pgrna914	Neutral|unknown475	801	1042	1104	1387	1036	934	1341	1431	975	1096
pgrna915	Neutral|unknown475	1166	1113	1177	1207	1109	1066	959	1219	1198	1443
pgrna916	Neutral|unknown475	525	571	832	941	720	576	1078	1514	939	853
pgrna917	Neutral|unknown475	913	927	944	1480	1000	705	1163	2015	930	606
pgrna918	Neutral|unknown475	1398	1350	1782	1998	1319	1198	1808	2105	1377	1174
pgrna919	Neutral|unknown475	885	964	1143	1681	1267	1017	1293	1797	1138	846
pgrna920	Neutral|unknown475	2286	2446	2369	2701	2519	2442	2029	2429	2961	3204
pgrna921	Neutral|unknown475	1709	1771	1736	2584	1393	1655	1481	2077	1766	2171
pgrna922	Neutral|unknown600	915	989	1034	1124	930	922	1385	1170	905	1434
pgrna923	Neutral|unknown600	1600	2202	2026	2563	2072	1887	2008	2278	2438	2537
pgrna924	Neutral|unknown600	659	791	705	737	1056	757	665	814	784	660
pgrna925	Neutral|unknown600	474	620	561	512	490	505	398	500	514	560
pgrna926	Neutral|unknown600	1958	2298	2315	3101	2134	2206	2300	2816	2022	2452
pgrna927	Neutral|unknown600	1589	1741	1635	2418	1800	1680	1851	1841	1662	1786
pgrna928	Neutral|unknown600	1631	1676	1840	3057	1836	1451	2451	2569	1623	1947
pgrna929	Neutral|unknown600	791	1140	1068	1316	1154	967	1032	1036	1356	1140
pgrna930	Neutral|unknown602	1630	1572	1790	2196	1341	1446	2379	1904	1318	1098
pgrna931	Neutral|unknown602	1373	1767	1711	2313	1531	1664	1699	1356	1806	1420
pgrna932	Neutral|unknown602	1013	1330	1551	1295	1318	1297	1611	1403	1553	1601
pgrna933	Neutral|unknown602	1439	1719	1758	2009	1720	1491	1879	2290	1857	2416
pgrna934	Neutral|unknown602	1950	2212	1980	2684	1834	2156	2078	2153	2629	3332
pgrna935	Neutral|unknown602	1114	1252	1417	1884	998	1203	1327	1575	951	1347
pgrna936	Neutral|unknown602	863	978	842	1383	933	907	1100	1402	1139	1406
pgrna937	Neutral|unknown602	881	1438	1225	1758	1183	1344	1321	2023	1200	1240
pgrna938	Neutral|unknown602	2254	2465	2888	3622	2414	2290	3125	3725	3311	2975
pgrna939	Neutral|unknown602	1319	1505	1736	2043	1802	1582	1528	1826	1329	1302
pgrna940	Neutral|unknown604	841	1149	1056	1327	1209	1081	1286	1358	1066	1285
pgrna941	Neutral|unknown604	1860	2418	2105	3258	2484	2404	2612	3274	2595	2830
pgrna942	Neutral|unknown604	588	573	415	846	468	562	545	1014	425	521
pgrna943	Neutral|unknown604	2780	3239	3360	4401	3183	2911	4975	5139	4283	3850
pgrna944	Neutral|unknown604	647	836	794	953	661	645	611	1041	435	479
pgrna945	Neutral|unknown604	1398	1495	1251	1482	1622	1291	1152	1487	2612	1890
pgrna946	Neutral|unknown604	1878	2310	2069	2751	1924	1966	2417	2093	2014	2172
pgrna947	Neutral|unknown604	2655	3248	3231	3624	2656	2778	3309	3793	2622	3058
pgrna948	Neutral|unknown604	2172	2720	2128	2979	2405	2322	2825	2944	2194	2788
pgrna949	Neutral|unknown604	1865	2262	2118	2587	1882	1873	2262	2512	2401	1848
pgrna950	Neutral|unknown612	1090	1190	1403	1798	1123	1018	1410	2364	1557	1504
pgrna951	Neutral|unknown612	1834	2288	2110	2854	2022	2171	2736	2914	2304	2344
pgrna952	Neutral|unknown612	1434	1529	1295	1893	1386	1327	1560	1430	1158	1359
pgrna953	Neutral|unknown612	1438	1563	1659	1951	1613	1687	1606	1798	1588	1864
pgrna954	Neutral|unknown612	2292	2428	2341	3158	2393	2161	3252	3830	2901	2704
pgrna955	Neutral|unknown612	2212	2177	2368	3242	2140	1937	2207	2869	2046	2514
pgrna956	Neutral|unknown612	1729	1826	1785	2327	1734	1630	2327	2056	1765	2433
pgrna957	Neutral|unknown612	1408	1646	1636	2087	1738	1554	1518	1954	1882	1563
pgrna958	Neutral|unknown612	1499	1820	2427	2423	1719	1956	2480	3077	1614	1785
pgrna959	Neutral|unknown612	2125	2078	2410	3434	2131	2103	2320	3392	2229	2858
pgrna960	Neutral|unknown846	777	1075	962	1085	871	861	1086	1198	932	928
pgrna961	Neutral|unknown846	1083	1320	1118	1456	1248	1223	1276	1017	1901	1829
pgrna962	Neutral|unknown846	1483	2036	1895	2462	2148	1752	1911	2873	2554	2518
pgrna963	Neutral|unknown846	721	788	588	716	769	606	832	915	857	703
pgrna964	Neutral|unknown846	1457	1636	1463	1894	1596	1588	1511	2180	1824	2785
pgrna965	Neutral|unknown846	1592	1955	1949	2498	1878	1855	2180	2438	1681	2133
pgrna966	Neutral|unknown846	1659	1656	2054	2369	1725	1285	2325	2116	2017	1702
pgrna967	Neutral|unknown846	1247	1732	1368	1975	1641	1872	2557	1952	1471	1966
pgrna968	Neutral|unknown846	1311	1387	1445	1901	1327	1214	1706	2597	2070	2256
pgrna969	Neutral|unknown846	1469	1600	1566	1959	1617	1624	1308	1928	2096	2463
pgrna970	Neutral|unknown847	794	793	833	967	1125	838	558	795	1486	1006
pgrna971	Neutral|unknown847	1716	1845	2054	2731	1758	1874	2368	2831	2280	2304
pgrna972	Neutral|unknown847	664	691	815	911	597	816	543	1178	733	529
pgrna973	Neutral|unknown847	1112	1275	1607	2156	1252	1255	2340	2394	906	1114
pgrna974	Neutral|unknown847	2009	1948	2172	2527	1734	1603	2696	2650	1710	2065
pgrna975	Neutral|unknown847	833	950	1240	1233	944	980	1280	1319	1200	1270
pgrna976	Neutral|unknown847	1827	1737	1988	2716	1451	1419	2282	3025	1337	1831
pgrna977	Neutral|unknown847	764	755	936	1112	878	676	1150	1173	1134	1048
pgrna978	Neutral|unknown847	1038	1356	1131	1730	1361	1353	1040	1101	1439	2007
pgrna979	Neutral|unknown847	1135	1216	1347	2038	1205	1255	1477	1856	1631	1991
