# Supplementary material for: Enhancing CRISPR deletion via pharmacological delay of DNA-PKcs
Source: HighWire-hosted journal article supplement (doi:10.1101/gr.265736.120), 2021-02-11
Supplement: Supplemental_File_S3.xlsx [file Supplemental_File_S3.xlsx]

## Sheet: Legend
Supplemental File S3. MAGeCK gene summary for the negative screen. Column content as per MAGeck documentation: group_id corresponds to the gene ID; #_items_in_group is the number of targeting sgRNAs for each gene; lo_value is the raw p-value; FDR corresponds to the false discovery rate; goodsgrna are sgRNAs whose ranking is below the alpha cutoff (determined by the --gene-test-fdr-threshold optio…
For reproducibility, copy the table sheet in .tsv format when using the Supplemental_Code

## Sheet: Supplemental_File_S3
Supplemental File S3. MAGeCK gene summary for the negative screen. Column content as per MAGeck documentation: group_id corresponds to the gene ID; #_items_in_group is the number of targeting sgRNAs for each gene; lo_value is the raw p-value; FDR corresponds to the false discovery rate; goodsgrna are sgRNAs whose ranking is below the alpha cutoff (determined by the --gene-test-fdr-threshold optio…
sample	group_id	items_in_group	lo_value	p	FDR	goodsgrna
T1_035_tre	Essential|RPL18A	10	2.8641e-10	4.9904e-06	0.000619	10
T1_035_tre	Essential|RPL13	8	6.7201e-06	9.4818e-05	0.003558	6
T1_035_tre	Essential|SNAPC5	5	1.3139e-05	9.4818e-05	0.003558	5
T1_035_tre	Essential|RPL23	10	1.8034e-05	0.00011478	0.003558	9
T1_035_tre	Essential|EIF3G	5	4.9102e-05	0.00024453	0.006064	4
T1_035_tre	Essential|RPL8	10	6.3529e-05	0.00047409	0.009798	8
T1_035_tre	Essential|KARS	5	0.00018949	0.00096315	0.017062	5
T1_035_tre	Essential|RPL21	10	0.0002914	0.0019113	0.029626	7
T1_035_tre	Essential|RPL30	10	0.00044468	0.0029493	0.036572	8
T1_035_tre	Essential|RRM2B	5	0.00058985	0.0028595	0.036572	5
T1_035_tre	Essential|BECN1	5	0.001207	0.0056242	0.0634	5
T1_035_tre	Essential|RPL23A	9	0.0013252	0.0072311	0.068202	7
T1_035_tre	Essential|ERCC1	5	0.0014053	0.0064925	0.06709	5
T1_035_tre	Essential|PRDM1	5	0.001693	0.0077002	0.068202	5
T1_035_tre	Essential|PTEN	10	0.0018096	0.010525	0.087005	7
T1_035_tre	Essential|USP24	5	0.0042164	0.016284	0.126199	4
T1_035_tre	Essential|RPL34	10	0.0090786	0.041875	0.285924	7
T1_035_tre	Essential|CCND1	5	0.012643	0.041166	0.285924	3
T1_035_tre	Essential|EIF5B	5	0.013468	0.043811	0.285924	4
T1_035_tre	Essential|RPL3	10	0.021225	0.083056	0.501941	5
T1_035_tre	Essential|RPL14	10	0.02312	0.089054	0.501941	3
T1_035_tre	Neutral|unknown1486	10	0.026632	0.10072	0.520395	6
T1_035_tre	Essential|NFE2L2	5	0.029078	0.08617	0.501941	4
T1_035_tre	Essential|ING5	4	0.039825	0.095412	0.514394	3
T1_035_tre	Essential|DAG1	5	0.0537	0.13263	0.657847	3
T1_035_tre	Essential|ATM	5	0.0607	0.14483	0.690713	3
T1_035_tre	Essential|UCK1	5	0.071668	0.16359	0.751306	3
T1_035_tre	Essential|MSMO1	5	0.078923	0.17681	0.782996	3
T1_035_tre	Neutral|unknown1613	10	0.081142	0.23105	0.894071	5
T1_035_tre	Neutral|unknown1480	10	0.08462	0.23794	0.894071	4
T1_035_tre	Essential|RPS15A	5	0.09134	0.19813	0.839009	3
T1_035_tre	Essential|SNRNP200	5	0.097685	0.20851	0.839009	3
T1_035_tre	Neutral|unknown2620	10	0.12135	0.31108	0.998109	5
T1_035_tre	Neutral|unknown2204	3	0.12734	0.20975	0.839009	1
T1_035_tre	Neutral|unknown119	10	0.13414	0.33531	0.998109	5
T1_035_tre	Essential|NF1	5	0.14904	0.2935	0.998109	2
T1_035_tre	Essential|SMAD4	5	0.17331	0.32344	0.998109	2
T1_035_tre	Essential|ALDH16A1	5	0.18593	0.3351	0.998109	2
T1_035_tre	Essential|AKT1	5	0.19025	0.33944	0.998109	2
T1_035_tre	Neutral|unknown2342	10	0.19512	0.41883	0.998109	4
T1_035_tre	Neutral|unknown278	10	0.19731	0.42156	0.998109	3
T1_035_tre	Essential|H19	10	0.22273	0.45311	0.998109	4
T1_035_tre	Neutral|unknown1045	10	0.22661	0.45794	0.998109	3
T1_035_tre	Essential|XPA	5	0.22829	0.37613	0.998109	1
T1_035_tre	Neutral|unknown114	10	0.26335	0.50232	0.998109	3
T1_035_tre	Neutral|unknown1479	10	0.26723	0.5069	0.998109	4
T1_035_tre	Essential|HNRNPM	5	0.27215	0.4186	0.998109	2
T1_035_tre	Neutral|unknown2377	10	0.32683	0.57837	0.998109	3
T1_035_tre	Essential|PPAP2C	5	0.34245	0.48705	0.998109	2
T1_035_tre	Essential|PPIL2	5	0.34856	0.49326	0.998109	2
T1_035_tre	Neutral|unknown604	10	0.3532	0.60515	0.998109	3
T1_035_tre	Essential|RBM5	5	0.36646	0.51131	0.998109	1
T1_035_tre	Essential|SLC24A1	5	0.38978	0.53463	0.998109	2
T1_035_tre	Neutral|unknown2345	7	0.39645	0.58845	0.998109	2
T1_035_tre	Neutral|unknown1487	10	0.44778	0.67548	0.998109	2
T1_035_tre	Neutral|unknown291	10	0.45758	0.68266	0.998109	2
T1_035_tre	Essential|NHP2L1	5	0.4602	0.60431	0.998109	2
T1_035_tre	Neutral|unknown264	10	0.46877	0.69179	0.998109	3
T1_035_tre	Neutral|unknown464	10	0.47696	0.69808	0.998109	2
T1_035_tre	Neutral|unknown2376	10	0.4993	0.7147	0.998109	3
T1_035_tre	Essential|ETV6	4	0.51102	0.56931	0.998109	1
T1_035_tre	Neutral|unknown1246	10	0.51535	0.72695	0.998109	3
T1_035_tre	Essential|PTCH1	5	0.52199	0.63343	0.998109	1
T1_035_tre	Neutral|unknown462	8	0.52253	0.70206	0.998109	1
T1_035_tre	Neutral|unknown275	10	0.53322	0.74083	0.998109	3
T1_035_tre	Neutral|unknown466	10	0.55779	0.75939	0.998109	2
T1_035_tre	Essential|ADAT1	5	0.56291	0.65167	0.998109	1
T1_035_tre	Neutral|unknown2590	10	0.57088	0.7699	0.998109	1
T1_035_tre	Neutral|unknown1248	10	0.57965	0.7771	0.998109	3
T1_035_tre	Neutral|unknown2578	10	0.58957	0.78512	0.998109	2
T1_035_tre	Essential|IK	5	0.59853	0.66887	0.998109	1
T1_035_tre	Neutral|unknown1485	10	0.60064	0.79381	0.998109	2
T1_035_tre	Neutral|unknown2593	10	0.61016	0.80071	0.998109	2
T1_035_tre	Essential|BRCA2	5	0.65851	0.70189	0.998109	1
T1_035_tre	Neutral|unknown846	10	0.66108	0.82215	0.998109	1
T1_035_tre	Essential|TP53	5	0.67127	0.70913	0.998109	1
T1_035_tre	Neutral|unknown1065	10	0.67848	0.82974	0.998109	2
T1_035_tre	Neutral|unknown2805	10	0.68125	0.83102	0.998109	2
T1_035_tre	Neutral|unknown2375	10	0.71464	0.84593	0.998109	1
T1_035_tre	Neutral|unknown274	10	0.72099	0.84904	0.998109	2
T1_035_tre	Essential|SRGAP2	5	0.73307	0.74991	0.998109	1
T1_035_tre	Neutral|unknown265	10	0.74894	0.86264	0.998109	1
T1_035_tre	Essential|PLXNB2	5	0.75863	0.7684	0.998109	1
T1_035_tre	Neutral|unknown273	10	0.76046	0.86848	0.998109	1
T1_035_tre	Neutral|unknown612	10	0.76327	0.86994	0.998109	1
T1_035_tre	Neutral|unknown1115	10	0.77419	0.87612	0.998109	1
T1_035_tre	Neutral|unknown1119	10	0.78138	0.87988	0.998109	2
T1_035_tre	Essential|CLSTN3	5	0.82126	0.82248	0.998109	1
T1_035_tre	Neutral|unknown271	10	0.82979	0.90779	0.998109	2
T1_035_tre	Neutral|unknown2199	10	0.84843	0.91915	0.998109	1
T1_035_tre	Neutral|unknown1483	10	0.85394	0.92043	0.998109	1
T1_035_tre	Essential|C1R	4	0.86182	0.86295	0.998109	0
T1_035_tre	Neutral|unknown1249	10	0.87103	0.92476	0.998109	1
T1_035_tre	Neutral|unknown1114	10	0.87422	0.9256	0.998109	1
T1_035_tre	Essential|STK11	5	0.87602	0.87857	0.998109	0
T1_035_tre	Essential|FAM188A	5	0.87698	0.87968	0.998109	0
T1_035_tre	Neutral|unknown1243	10	0.89993	0.93318	0.998109	1
T1_035_tre	Neutral|unknown475	10	0.90617	0.93523	0.998109	1
T1_035_tre	Essential|CLEC2B	5	0.90695	0.90838	0.998109	0
T1_035_tre	Neutral|unknown3099	10	0.90857	0.93597	0.998109	1
T1_035_tre	Essential|LCP1	5	0.91144	0.91279	0.998109	0
T1_035_tre	Essential|EPHA2	4	0.92164	0.92174	0.998109	0
T1_035_tre	Neutral|unknown2205	10	0.92387	0.94168	0.998109	1
T1_035_tre	Neutral|unknown1066	10	0.95056	0.95526	0.998109	1
T1_035_tre	Neutral|unknown276	10	0.96099	0.9625	0.998109	1
T1_035_tre	Neutral|unknown1905	10	0.96154	0.96291	0.998109	1
T1_035_tre	Neutral|unknown602	10	0.96314	0.96431	0.998109	1
T1_035_tre	Essential|SERPINB8	5	0.96696	0.96697	0.998109	0
T1_035_tre	Neutral|unknown2804	10	0.96896	0.96956	0.998109	1
T1_035_tre	Neutral|unknown600	8	0.97281	0.97271	0.998109	0
T1_035_tre	Essential|KEAP1	5	0.97783	0.97788	0.998109	0
T1_035_tre	Neutral|unknown1587	10	0.98036	0.98087	0.998109	0
T1_035_tre	Neutral|unknown1488	10	0.98314	0.98378	0.998109	0
T1_035_tre	Neutral|unknown465	10	0.98622	0.98671	0.998109	0
T1_035_tre	Neutral|unknown2372	10	0.98842	0.98889	0.998109	0
T1_035_tre	Neutral|unknown288	10	0.98964	0.98998	0.998109	0
T1_035_tre	Neutral|unknown1900	10	0.99045	0.99056	0.998109	0
T1_035_tre	Neutral|unknown2201	10	0.9944	0.99449	0.998109	0
T1_035_tre	Essential|RB1	5	0.99608	0.99588	0.998109	0
T1_035_tre	Neutral|unknown2374	10	0.99645	0.99655	0.998109	0
T1_035_tre	Neutral|unknown1118	6	0.9974	0.99749	0.998109	0
T1_035_tre	Neutral|unknown847	10	0.99758	0.99761	0.998109	0
T1_035_tre	Neutral|unknown2370	10	0.99784	0.99789	0.998109	0
T1_035_tre	Neutral|unknown1484	10	0.99803	0.99811	0.998109	0
T1_035_unt	Essential|RPL18A	10	2.5535e-09	4.9904e-06	0.000619	10
T1_035_unt	Essential|EIF3G	5	1.8721e-05	0.00014472	0.008973	4
T1_035_unt	Essential|RPL30	10	0.00014902	0.00097313	0.040223	6
T1_035_unt	Essential|SNAPC5	5	0.00036689	0.0018115	0.056157	4
T1_035_unt	Neutral|unknown2377	10	0.00074535	0.0045962	0.081418	7
T1_035_unt	Essential|RPL23A	9	0.00077586	0.0043766	0.081418	6
T1_035_unt	Essential|RPL13	8	0.00089423	0.0044365	0.081418	6
T1_035_unt	Essential|SMAD4	5	0.005011	0.017631	0.249931	4
T1_035_unt	Essential|RPL34	10	0.0050644	0.024488	0.276046	6
T1_035_unt	Essential|CCND1	5	0.0052256	0.01814	0.249931	4
T1_035_unt	Essential|KARS	5	0.0066118	0.022522	0.276046	3
T1_035_unt	Essential|RPL14	10	0.011827	0.048492	0.446125	4
T1_035_unt	Essential|RPL23	10	0.013045	0.052873	0.446125	4
T1_035_unt	Essential|RPL8	10	0.014457	0.057564	0.446125	6
T1_035_unt	Essential|UCK1	5	0.017235	0.05447	0.446125	4
T1_035_unt	Essential|TP53	5	0.017558	0.055289	0.446125	3
T1_035_unt	Essential|PTEN	10	0.022878	0.086349	0.59485	6
T1_035_unt	Neutral|unknown2342	10	0.026719	0.097937	0.607209	4
T1_035_unt	Essential|PRDM1	5	0.027873	0.075969	0.554128	3
T1_035_unt	Essential|BECN1	5	0.036804	0.093705	0.607209	3
T1_035_unt	Essential|DAG1	5	0.045121	0.10996	0.64931	3
T1_035_unt	Essential|RBM5	5	0.062336	0.14204	0.800602	2
T1_035_unt	Essential|NFE2L2	5	0.069047	0.15423	0.822014	3
T1_035_unt	Essential|EIF5B	5	0.071823	0.1591	0.822014	3
T1_035_unt	Essential|RPL21	10	0.075703	0.21425	0.916119	4
T1_035_unt	Essential|ERCC1	5	0.076316	0.16754	0.831015	2
T1_035_unt	Neutral|unknown1487	10	0.079628	0.22262	0.920153	4
T1_035_unt	Essential|ALDH16A1	5	0.081396	0.17683	0.843322	2
T1_035_unt	Essential|XPA	5	0.086561	0.18632	0.855679	3
T1_035_unt	Essential|RRM2B	5	0.096037	0.20303	0.899112	2
T1_035_unt	Neutral|unknown475	10	0.10418	0.2691	0.997909	3
T1_035_unt	Essential|FAM188A	5	0.11733	0.2384	0.953589	2
T1_035_unt	Neutral|unknown1486	10	0.12405	0.30024	0.997909	4
T1_035_unt	Essential|SLC24A1	5	0.13999	0.26284	0.997909	2
T1_035_unt	Neutral|unknown2620	10	0.14293	0.32883	0.997909	3
T1_035_unt	Neutral|unknown2375	10	0.14782	0.33617	0.997909	4
T1_035_unt	Essential|USP24	5	0.15071	0.27459	0.997909	1
T1_035_unt	Neutral|unknown119	10	0.15642	0.34855	0.997909	4
T1_035_unt	Neutral|unknown1249	10	0.15847	0.35154	0.997909	4
T1_035_unt	Essential|NHP2L1	5	0.18593	0.31128	0.997909	2
T1_035_unt	Neutral|unknown600	8	0.18866	0.36941	0.997909	3
T1_035_unt	Essential|IK	5	0.19264	0.31862	0.997909	2
T1_035_unt	Essential|CLSTN3	5	0.20449	0.3314	0.997909	2
T1_035_unt	Neutral|unknown604	10	0.27106	0.49771	0.997909	1
T1_035_unt	Essential|ETV6	4	0.27644	0.40244	0.997909	2
T1_035_unt	Essential|STK11	5	0.28072	0.41277	0.997909	1
T1_035_unt	Essential|RPL3	10	0.28627	0.51204	0.997909	3
T1_035_unt	Essential|MSMO1	5	0.28691	0.41967	0.997909	2
T1_035_unt	Neutral|unknown846	10	0.3012	0.52575	0.997909	1
T1_035_unt	Essential|HNRNPM	5	0.32313	0.45783	0.997909	2
T1_035_unt	Essential|RPS15A	5	0.336	0.47192	0.997909	2
T1_035_unt	Neutral|unknown275	10	0.34852	0.56965	0.997909	3
T1_035_unt	Neutral|unknown1480	10	0.34925	0.57038	0.997909	2
T1_035_unt	Neutral|unknown2804	10	0.35124	0.57212	0.997909	1
T1_035_unt	Essential|EPHA2	4	0.36011	0.44948	0.997909	1
T1_035_unt	Neutral|unknown2578	10	0.38499	0.60248	0.997909	2
T1_035_unt	Essential|SERPINB8	5	0.38743	0.52852	0.997909	1
T1_035_unt	Neutral|unknown1613	10	0.39155	0.60848	0.997909	1
T1_035_unt	Neutral|unknown1485	10	0.40155	0.61722	0.997909	3
T1_035_unt	Essential|PLXNB2	5	0.40447	0.53693	0.997909	1
T1_035_unt	Essential|H19	10	0.40779	0.62278	0.997909	3
T1_035_unt	Neutral|unknown2805	10	0.41403	0.62871	0.997909	3
T1_035_unt	Essential|ING5	4	0.43539	0.49371	0.997909	1
T1_035_unt	Neutral|unknown1479	10	0.43582	0.64866	0.997909	3
T1_035_unt	Neutral|unknown464	10	0.47696	0.68687	0.997909	2
T1_035_unt	Neutral|unknown1119	10	0.50331	0.71038	0.997909	3
T1_035_unt	Neutral|unknown114	10	0.50475	0.71171	0.997909	2
T1_035_unt	Essential|PTCH1	5	0.50479	0.58553	0.997909	1
T1_035_unt	Neutral|unknown2376	10	0.52601	0.72242	0.997909	2
T1_035_unt	Neutral|unknown2345	7	0.5332	0.67171	0.997909	2
T1_035_unt	Neutral|unknown276	10	0.5337	0.72652	0.997909	2
T1_035_unt	Neutral|unknown1065	10	0.54645	0.73334	0.997909	1
T1_035_unt	Essential|NF1	5	0.56554	0.61877	0.997909	1
T1_035_unt	Neutral|unknown847	10	0.59421	0.75919	0.997909	2
T1_035_unt	Neutral|unknown1248	10	0.62573	0.77664	0.997909	2
T1_035_unt	Neutral|unknown2374	10	0.62879	0.77846	0.997909	2
T1_035_unt	Essential|PPAP2C	5	0.63636	0.66348	0.997909	1
T1_035_unt	Essential|SRGAP2	5	0.63862	0.66523	0.997909	1
T1_035_unt	Neutral|unknown1243	10	0.64686	0.78895	0.997909	2
T1_035_unt	Neutral|unknown1114	10	0.66147	0.79704	0.997909	2
T1_035_unt	Neutral|unknown265	10	0.67986	0.80775	0.997909	1
T1_035_unt	Essential|SNRNP200	5	0.68162	0.69561	0.997909	1
T1_035_unt	Neutral|unknown3099	10	0.6835	0.80994	0.997909	1
T1_035_unt	Essential|C1R	4	0.68445	0.68438	0.997909	1
T1_035_unt	Neutral|unknown1118	6	0.68935	0.7276	0.997909	1
T1_035_unt	Neutral|unknown1045	10	0.69421	0.81653	0.997909	1
T1_035_unt	Neutral|unknown2370	10	0.6949	0.8169	0.997909	2
T1_035_unt	Neutral|unknown1066	10	0.6977	0.81871	0.997909	1
T1_035_unt	Neutral|unknown264	10	0.73998	0.8453	0.997909	2
T1_035_unt	Neutral|unknown291	10	0.74783	0.85065	0.997909	2
T1_035_unt	Neutral|unknown274	10	0.75763	0.85717	0.997909	1
T1_035_unt	Essential|CLEC2B	5	0.77144	0.77262	0.997909	1
T1_035_unt	Neutral|unknown2204	3	0.79	0.79039	0.997909	0
T1_035_unt	Neutral|unknown1483	10	0.81796	0.88317	0.997909	1
T1_035_unt	Essential|ADAT1	5	0.82254	0.82373	0.997909	0
T1_035_unt	Neutral|unknown1115	10	0.82658	0.88579	0.997909	1
T1_035_unt	Essential|PPIL2	5	0.83376	0.8349	0.997909	0
T1_035_unt	Neutral|unknown2199	10	0.85927	0.89712	0.997909	1
T1_035_unt	Essential|AKT1	5	0.87114	0.87336	0.997909	0
T1_035_unt	Neutral|unknown278	10	0.8804	0.9058	0.997909	1
T1_035_unt	Neutral|unknown465	10	0.88773	0.90888	0.997909	1
T1_035_unt	Neutral|unknown1905	10	0.89194	0.91096	0.997909	1
T1_035_unt	Neutral|unknown2590	10	0.896	0.91329	0.997909	1
T1_035_unt	Neutral|unknown2201	10	0.89732	0.91395	0.997909	1
T1_035_unt	Essential|KEAP1	5	0.89824	0.89975	0.997909	0
T1_035_unt	Essential|ATM	5	0.89987	0.90137	0.997909	0
T1_035_unt	Neutral|unknown1246	10	0.9132	0.92232	0.997909	1
T1_035_unt	Neutral|unknown1900	10	0.9208	0.92729	0.997909	1
T1_035_unt	Neutral|unknown1488	10	0.92875	0.93252	0.997909	1
T1_035_unt	Neutral|unknown462	8	0.93783	0.93752	0.997909	0
T1_035_unt	Neutral|unknown2593	10	0.94631	0.94647	0.997909	1
T1_035_unt	Essential|LCP1	5	0.95037	0.95039	0.997909	0
T1_035_unt	Neutral|unknown602	10	0.95256	0.95252	0.997909	0
T1_035_unt	Neutral|unknown271	10	0.95386	0.95384	0.997909	0
T1_035_unt	Neutral|unknown466	10	0.96099	0.96114	0.997909	0
T1_035_unt	Neutral|unknown1484	10	0.96417	0.96453	0.997909	0
T1_035_unt	Essential|BRCA2	5	0.96628	0.96624	0.997909	0
T1_035_unt	Neutral|unknown288	10	0.97786	0.97826	0.997909	0
T1_035_unt	Neutral|unknown1587	10	0.97819	0.97876	0.997909	0
T1_035_unt	Neutral|unknown612	10	0.97976	0.98027	0.997909	0
T1_035_unt	Neutral|unknown2205	10	0.98261	0.98316	0.997909	0
T1_035_unt	Neutral|unknown2372	10	0.99076	0.99085	0.997909	0
T1_035_unt	Essential|RB1	5	0.9972	0.99711	0.997909	0
T1_035_unt	Neutral|unknown273	10	0.99788	0.99791	0.997909	0
T1_06_tre	Essential|PTEN	10	4.8747e-07	4.9904e-06	0.000619	9
T1_06_tre	Essential|RPL30	10	1.7612e-06	9.9808e-06	0.000619	10
T1_06_tre	Essential|RPL8	10	1.8657e-06	1.4971e-05	0.000619	9
T1_06_tre	Essential|EIF3G	5	3.0307e-06	2.4952e-05	0.000774	4
T1_06_tre	Essential|RPL18A	10	7.668e-06	5.4895e-05	0.001361	9
T1_06_tre	Essential|BECN1	5	4.247e-05	0.00023455	0.004847	5
T1_06_tre	Essential|RPL13	8	5.841e-05	0.00046411	0.008221	6
T1_06_tre	Essential|RPL23A	9	0.00051166	0.003149	0.048809	8
T1_06_tre	Essential|CCND1	5	0.00085371	0.0040971	0.056449	5
T1_06_tre	Essential|SNAPC5	5	0.0010068	0.004706	0.058354	5
T1_06_tre	Essential|RPL23	10	0.0011286	0.0072012	0.081177	5
T1_06_tre	Essential|USP24	5	0.0019221	0.0086883	0.089779	4
T1_06_tre	Essential|RPL21	10	0.0024672	0.013808	0.122304	7
T1_06_tre	Essential|DAG1	5	0.0026944	0.011862	0.113147	3
T1_06_tre	Essential|PPIL2	5	0.0050581	0.019278	0.159365	3
T1_06_tre	Essential|UCK1	5	0.0055597	0.020705	0.160466	4
T1_06_tre	Essential|RPL14	10	0.0077334	0.036724	0.252991	6
T1_06_tre	Essential|KARS	5	0.0084366	0.029508	0.215237	4
T1_06_tre	Essential|AKT1	5	0.011629	0.0389	0.253876	4
T1_06_tre	Essential|RPS15A	5	0.014349	0.046606	0.288954	4
T1_06_tre	Essential|TP53	5	0.019097	0.060259	0.355817	4
T1_06_tre	Neutral|unknown1486	10	0.020329	0.082906	0.458002	5
T1_06_tre	Essential|ERCC1	5	0.028592	0.084952	0.458002	3
T1_06_tre	Essential|RRM2B	5	0.04311	0.11949	0.617342	3
T1_06_tre	Essential|LCP1	5	0.047185	0.12698	0.629827	3
T1_06_tre	Essential|RPL34	10	0.062706	0.20261	0.868007	6
T1_06_tre	Neutral|unknown291	10	0.063623	0.20522	0.868007	6
T1_06_tre	Neutral|unknown275	10	0.066021	0.21	0.868007	4
T1_06_tre	Essential|ATM	5	0.076316	0.17654	0.841941	2
T1_06_tre	Essential|RBM5	5	0.086728	0.19447	0.868007	3
T1_06_tre	Essential|HNRNPM	5	0.11396	0.23877	0.925491	2
T1_06_tre	Essential|RB1	5	0.114	0.23884	0.925491	3
T1_06_tre	Neutral|unknown1119	10	0.12047	0.31352	0.998528	2
T1_06_tre	Essential|PRDM1	5	0.14791	0.29273	0.998528	3
T1_06_tre	Neutral|unknown1613	10	0.15291	0.37103	0.998528	5
T1_06_tre	Neutral|unknown604	10	0.15468	0.37374	0.998528	5
T1_06_tre	Essential|NHP2L1	5	0.16921	0.32646	0.998528	3
T1_06_tre	Essential|IK	5	0.17522	0.33543	0.998528	3
T1_06_tre	Essential|C1R	4	0.17671	0.29944	0.998528	2
T1_06_tre	Essential|ALDH16A1	5	0.17754	0.33854	0.998528	3
T1_06_tre	Neutral|unknown2204	3	0.1865	0.29122	0.998528	2
T1_06_tre	Essential|XPA	5	0.20847	0.37492	0.998528	2
T1_06_tre	Essential|BRCA2	5	0.21247	0.37886	0.998528	2
T1_06_tre	Essential|RPL3	10	0.22367	0.46801	0.998528	3
T1_06_tre	Neutral|unknown1479	10	0.2631	0.51121	0.998528	3
T1_06_tre	Neutral|unknown271	10	0.26607	0.51436	0.998528	3
T1_06_tre	Essential|EPHA2	4	0.28167	0.41471	0.998528	2
T1_06_tre	Essential|H19	10	0.29297	0.54478	0.998528	4
T1_06_tre	Neutral|unknown465	10	0.30532	0.55799	0.998528	3
T1_06_tre	Essential|ING5	4	0.30808	0.44456	0.998528	2
T1_06_tre	Neutral|unknown2620	10	0.30874	0.56153	0.998528	4
T1_06_tre	Essential|KEAP1	5	0.31907	0.47509	0.998528	1
T1_06_tre	Neutral|unknown1900	10	0.32148	0.57578	0.998528	3
T1_06_tre	Neutral|unknown1485	10	0.32306	0.57755	0.998528	2
T1_06_tre	Essential|SLC24A1	5	0.33762	0.492	0.998528	2
T1_06_tre	Essential|ADAT1	5	0.35935	0.51229	0.998528	1
T1_06_tre	Neutral|unknown1487	10	0.36097	0.61876	0.998528	3
T1_06_tre	Neutral|unknown1045	10	0.36494	0.62304	0.998528	1
T1_06_tre	Essential|NFE2L2	5	0.37351	0.52544	0.998528	1
T1_06_tre	Essential|CLSTN3	5	0.37902	0.5308	0.998528	2
T1_06_tre	Neutral|unknown288	10	0.38193	0.64024	0.998528	4
T1_06_tre	Neutral|unknown1480	10	0.38469	0.64319	0.998528	4
T1_06_tre	Neutral|unknown462	8	0.41807	0.63658	0.998528	2
T1_06_tre	Essential|EIF5B	5	0.43688	0.58352	0.998528	2
T1_06_tre	Neutral|unknown602	10	0.48815	0.72026	0.998528	3
T1_06_tre	Essential|SNRNP200	5	0.50187	0.64544	0.998528	1
T1_06_tre	Essential|FAM188A	5	0.50406	0.64765	0.998528	2
T1_06_tre	Neutral|unknown119	10	0.51834	0.7402	0.998528	3
T1_06_tre	Essential|ETV6	4	0.52284	0.59617	0.998528	1
T1_06_tre	Neutral|unknown274	10	0.53322	0.75059	0.998528	3
T1_06_tre	Neutral|unknown264	10	0.53617	0.75256	0.998528	3
T1_06_tre	Neutral|unknown1248	10	0.55637	0.76615	0.998528	2
T1_06_tre	Neutral|unknown2372	10	0.56609	0.77295	0.998528	1
T1_06_tre	Neutral|unknown1488	10	0.5679	0.77426	0.998528	2
T1_06_tre	Neutral|unknown1066	10	0.57965	0.78263	0.998528	3
T1_06_tre	Neutral|unknown2593	10	0.59375	0.79255	0.998528	3
T1_06_tre	Neutral|unknown2199	10	0.59863	0.79579	0.998528	1
T1_06_tre	Neutral|unknown2377	10	0.61585	0.80789	0.998528	3
T1_06_tre	Neutral|unknown276	10	0.63312	0.82007	0.998528	2
T1_06_tre	Essential|MSMO1	5	0.63862	0.70984	0.998528	1
T1_06_tre	Neutral|unknown1249	10	0.6409	0.82572	0.998528	2
T1_06_tre	Neutral|unknown1243	10	0.64535	0.82865	0.998528	1
T1_06_tre	Neutral|unknown2342	10	0.6531	0.83362	0.998528	3
T1_06_tre	Neutral|unknown2205	10	0.65329	0.83376	0.998528	1
T1_06_tre	Essential|SRGAP2	5	0.68568	0.73401	0.998528	1
T1_06_tre	Essential|PTCH1	5	0.7667	0.78376	0.998528	1
T1_06_tre	Neutral|unknown265	10	0.7918	0.89338	0.998528	2
T1_06_tre	Essential|SERPINB8	5	0.80937	0.81552	0.998528	1
T1_06_tre	Neutral|unknown114	10	0.81124	0.90217	0.998528	2
T1_06_tre	Neutral|unknown464	10	0.81529	0.90432	0.998528	2
T1_06_tre	Neutral|unknown2345	7	0.81597	0.85962	0.998528	1
T1_06_tre	Neutral|unknown1246	10	0.81715	0.90534	0.998528	2
T1_06_tre	Neutral|unknown475	10	0.82446	0.90895	0.998528	1
T1_06_tre	Essential|CLEC2B	5	0.83856	0.84054	0.998528	1
T1_06_tre	Neutral|unknown2375	10	0.83882	0.91646	0.998528	1
T1_06_tre	Neutral|unknown2376	10	0.84341	0.91898	0.998528	2
T1_06_tre	Neutral|unknown1065	10	0.84505	0.91986	0.998528	2
T1_06_tre	Neutral|unknown2805	10	0.84829	0.92168	0.998528	2
T1_06_tre	Essential|SMAD4	5	0.8523	0.85398	0.998528	1
T1_06_tre	Neutral|unknown3099	10	0.88915	0.94166	0.998528	1
T1_06_tre	Neutral|unknown600	8	0.89488	0.91346	0.998528	1
T1_06_tre	Essential|NF1	5	0.92124	0.92245	0.998528	0
T1_06_tre	Essential|PPAP2C	5	0.92323	0.92441	0.998528	0
T1_06_tre	Neutral|unknown846	10	0.94095	0.95652	0.998528	1
T1_06_tre	Neutral|unknown2201	10	0.94847	0.95957	0.998528	1
T1_06_tre	Neutral|unknown2374	10	0.94987	0.96028	0.998528	1
T1_06_tre	Essential|PLXNB2	5	0.95774	0.95789	0.998528	0
T1_06_tre	Neutral|unknown847	10	0.95873	0.96469	0.998528	1
T1_06_tre	Neutral|unknown1905	10	0.95931	0.96507	0.998528	1
T1_06_tre	Neutral|unknown1118	6	0.96789	0.96857	0.998528	0
T1_06_tre	Neutral|unknown1483	10	0.96896	0.97108	0.998528	1
T1_06_tre	Neutral|unknown2578	10	0.97469	0.9754	0.998528	1
T1_06_tre	Neutral|unknown1484	10	0.97946	0.98	0.998528	0
T1_06_tre	Neutral|unknown2370	10	0.98235	0.98289	0.998528	0
T1_06_tre	Neutral|unknown1587	10	0.9834	0.98402	0.998528	0
T1_06_tre	Neutral|unknown278	10	0.98643	0.98697	0.998528	0
T1_06_tre	Neutral|unknown1115	10	0.98878	0.98913	0.998528	0
T1_06_tre	Essential|STK11	5	0.99118	0.99095	0.998528	0
T1_06_tre	Neutral|unknown466	10	0.99241	0.99255	0.998528	0
T1_06_tre	Neutral|unknown1114	10	0.99421	0.99437	0.998528	0
T1_06_tre	Neutral|unknown273	10	0.99486	0.99504	0.998528	0
T1_06_tre	Neutral|unknown612	10	0.99704	0.99719	0.998528	0
T1_06_tre	Neutral|unknown2590	10	0.99792	0.99797	0.998528	0
T1_06_tre	Neutral|unknown2804	10	0.99844	0.99853	0.998528	0
T1_06_unt	Essential|RPL18A	10	1.4598e-06	4.9904e-06	0.000619	6
T1_06_unt	Essential|RPL13	8	1.6708e-06	5.4895e-05	0.003403	7
T1_06_unt	Essential|RPL23	10	0.00018631	0.0011328	0.046823	7
T1_06_unt	Essential|RPL30	10	0.00069272	0.0038077	0.094431	6
T1_06_unt	Essential|EIF3G	5	0.0009655	0.003648	0.094431	4
T1_06_unt	Essential|SNAPC5	5	0.0021403	0.0078399	0.162026	4
T1_06_unt	Essential|ERCC1	5	0.0077195	0.021993	0.349087	3
T1_06_unt	Essential|BECN1	5	0.0079761	0.022522	0.349087	2
T1_06_unt	Essential|CCND1	5	0.0094556	0.025845	0.356092	3
T1_06_unt	Essential|RPS15A	5	0.01269	0.033491	0.415285	1
T1_06_unt	Neutral|unknown1486	10	0.025269	0.077636	0.690992	4
T1_06_unt	Essential|RRM2B	5	0.025746	0.062695	0.690992	2
T1_06_unt	Essential|DAG1	5	0.029569	0.071158	0.690992	2
T1_06_unt	Essential|XPA	5	0.032726	0.078015	0.690992	1
T1_06_unt	Essential|RPL34	10	0.032743	0.095651	0.749634	3
T1_06_unt	Essential|RPL21	10	0.034767	0.10022	0.749634	4
T1_06_unt	Essential|RPL8	10	0.038904	0.1097	0.749634	3
T1_06_unt	Neutral|unknown1248	10	0.046214	0.12665	0.749634	3
T1_06_unt	Essential|UCK1	5	0.049495	0.10374	0.749634	2
T1_06_unt	Essential|NHP2L1	5	0.060999	0.11842	0.749634	2
T1_06_unt	Essential|PPIL2	5	0.070593	0.13104	0.749634	2
T1_06_unt	Essential|ADAT1	5	0.072008	0.133	0.749634	2
T1_06_unt	Neutral|unknown1119	10	0.092818	0.21163	0.999935	3
T1_06_unt	Essential|RBM5	5	0.097622	0.16737	0.887557	2
T1_06_unt	Essential|RPL14	10	0.1002	0.22269	0.999935	2
T1_06_unt	Essential|EPHA2	4	0.10385	0.17179	0.887557	1
T1_06_unt	Neutral|unknown1613	10	0.1195	0.25103	0.999935	3
T1_06_unt	Essential|RPL3	10	0.11995	0.25175	0.999935	2
T1_06_unt	Essential|USP24	5	0.12351	0.2012	0.997946	1
T1_06_unt	Neutral|unknown2372	10	0.14782	0.29169	0.999935	3
T1_06_unt	Essential|CLSTN3	5	0.15454	0.24266	0.999935	2
T1_06_unt	Neutral|unknown1485	10	0.15528	0.30175	0.999935	3
T1_06_unt	Essential|RPL23A	9	0.15762	0.29974	0.999935	2
T1_06_unt	Essential|ATM	5	0.15825	0.24765	0.999935	2
T1_06_unt	Essential|PTEN	10	0.16802	0.31988	0.999935	3
T1_06_unt	Essential|BRCA2	5	0.16847	0.26135	0.999935	1
T1_06_unt	Essential|SERPINB8	5	0.17331	0.26745	0.999935	2
T1_06_unt	Essential|CLEC2B	5	0.19264	0.29323	0.999935	2
T1_06_unt	Neutral|unknown275	10	0.19731	0.36002	0.999935	3
T1_06_unt	Neutral|unknown274	10	0.21675	0.38692	0.999935	3
T1_06_unt	Neutral|unknown1243	10	0.22367	0.39621	0.999935	2
T1_06_unt	Essential|LCP1	5	0.23243	0.31944	0.999935	1
T1_06_unt	Neutral|unknown1488	10	0.2477	0.41535	0.999935	1
T1_06_unt	Essential|KEAP1	5	0.25286	0.33151	0.999935	1
T1_06_unt	Essential|PRDM1	5	0.27679	0.34672	0.999935	1
T1_06_unt	Neutral|unknown271	10	0.28627	0.44669	0.999935	2
T1_06_unt	Neutral|unknown1065	10	0.32306	0.47704	0.999935	2
T1_06_unt	Neutral|unknown1114	10	0.32943	0.48287	0.999935	2
T1_06_unt	Neutral|unknown1479	10	0.33728	0.48934	0.999935	1
T1_06_unt	Neutral|unknown1900	10	0.38499	0.53136	0.999935	2
T1_06_unt	Essential|EIF5B	5	0.40109	0.43253	0.999935	1
T1_06_unt	Neutral|unknown291	10	0.40415	0.54839	0.999935	2
T1_06_unt	Essential|SLC24A1	5	0.40447	0.43494	0.999935	1
T1_06_unt	Essential|PPAP2C	5	0.40783	0.43739	0.999935	1
T1_06_unt	Essential|HNRNPM	5	0.43095	0.45421	0.999935	1
T1_06_unt	Essential|C1R	4	0.44857	0.44991	0.999935	1
T1_06_unt	Neutral|unknown475	10	0.48721	0.62538	0.999935	2
T1_06_unt	Essential|KARS	5	0.51057	0.51772	0.999935	1
T1_06_unt	Essential|PTCH1	5	0.53871	0.54242	0.999935	1
T1_06_unt	Essential|NFE2L2	5	0.5496	0.55197	0.999935	1
T1_06_unt	Neutral|unknown2620	10	0.55637	0.66692	0.999935	1
T1_06_unt	Essential|MSMO1	5	0.57075	0.57099	0.999935	1
T1_06_unt	Neutral|unknown2342	10	0.57562	0.67552	0.999935	1
T1_06_unt	Neutral|unknown2593	10	0.58497	0.67983	0.999935	1
T1_06_unt	Essential|TP53	5	0.5886	0.58846	0.999935	1
T1_06_unt	Neutral|unknown462	8	0.59796	0.63686	0.999935	1
T1_06_unt	Neutral|unknown2199	10	0.61622	0.69338	0.999935	1
T1_06_unt	Neutral|unknown2204	3	0.62213	0.62179	0.999935	0
T1_06_unt	Neutral|unknown2377	10	0.63312	0.70177	0.999935	1
T1_06_unt	Essential|ALDH16A1	5	0.65198	0.65294	0.999935	0
T1_06_unt	Neutral|unknown114	10	0.65329	0.71184	0.999935	1
T1_06_unt	Essential|SNRNP200	5	0.66066	0.66113	0.999935	0
T1_06_unt	Neutral|unknown2375	10	0.66871	0.71965	0.999935	1
T1_06_unt	Neutral|unknown1487	10	0.69421	0.73368	0.999935	1
T1_06_unt	Essential|SMAD4	5	0.69762	0.69823	0.999935	0
T1_06_unt	Neutral|unknown2201	10	0.71793	0.74773	0.999935	1
T1_06_unt	Neutral|unknown1118	6	0.72454	0.72598	0.999935	0
T1_06_unt	Neutral|unknown278	10	0.73072	0.75517	0.999935	1
T1_06_unt	Neutral|unknown264	10	0.73384	0.75695	0.999935	1
T1_06_unt	Neutral|unknown1246	10	0.743	0.76302	0.999935	1
T1_06_unt	Essential|AKT1	5	0.74865	0.74989	0.999935	0
T1_06_unt	Neutral|unknown2374	10	0.75187	0.76887	0.999935	1
T1_06_unt	Essential|ING5	4	0.7606	0.76067	0.999935	0
T1_06_unt	Essential|IK	5	0.76511	0.76598	0.999935	0
T1_06_unt	Neutral|unknown2205	10	0.76604	0.77925	0.999935	1
T1_06_unt	Neutral|unknown3099	10	0.79955	0.80452	0.999935	1
T1_06_unt	Neutral|unknown465	10	0.80664	0.81032	0.999935	1
T1_06_unt	Neutral|unknown464	10	0.80896	0.8125	0.999935	1
T1_06_unt	Essential|FAM188A	5	0.80937	0.81034	0.999935	0
T1_06_unt	Neutral|unknown846	10	0.81124	0.81433	0.999935	1
T1_06_unt	Essential|SRGAP2	5	0.81736	0.81817	0.999935	0
T1_06_unt	Neutral|unknown1905	10	0.82446	0.82649	0.999935	1
T1_06_unt	Neutral|unknown1045	10	0.82868	0.83048	0.999935	1
T1_06_unt	Essential|H19	10	0.84273	0.8442	0.999935	0
T1_06_unt	Neutral|unknown288	10	0.84465	0.84633	0.999935	0
T1_06_unt	Neutral|unknown1484	10	0.84843	0.85011	0.999935	0
T1_06_unt	Essential|ETV6	4	0.8494	0.85063	0.999935	0
T1_06_unt	Neutral|unknown1115	10	0.85394	0.85527	0.999935	0
T1_06_unt	Neutral|unknown604	10	0.86941	0.87046	0.999935	0
T1_06_unt	Neutral|unknown2345	7	0.87931	0.87937	0.999935	0
T1_06_unt	Neutral|unknown1480	10	0.8804	0.88168	0.999935	0
T1_06_unt	Neutral|unknown119	10	0.89331	0.89402	0.999935	0
T1_06_unt	Neutral|unknown1587	10	0.90372	0.90446	0.999935	0
T1_06_unt	Neutral|unknown2370	10	0.91762	0.91779	0.999935	0
T1_06_unt	Neutral|unknown2590	10	0.9208	0.92113	0.999935	0
T1_06_unt	Neutral|unknown265	10	0.92183	0.92197	0.999935	0
T1_06_unt	Neutral|unknown1066	10	0.92585	0.92595	0.999935	0
T1_06_unt	Essential|RB1	5	0.93659	0.93758	0.999935	0
T1_06_unt	Essential|NF1	5	0.93825	0.93924	0.999935	0
T1_06_unt	Neutral|unknown600	8	0.94065	0.94025	0.999935	0
T1_06_unt	Neutral|unknown466	10	0.94253	0.94273	0.999935	0
T1_06_unt	Neutral|unknown847	10	0.9433	0.94348	0.999935	0
T1_06_unt	Essential|PLXNB2	5	0.96089	0.9611	0.999935	0
T1_06_unt	Neutral|unknown2578	10	0.97236	0.97262	0.999935	0
T1_06_unt	Neutral|unknown2805	10	0.97277	0.973	0.999935	0
T1_06_unt	Neutral|unknown1483	10	0.9834	0.98402	0.999935	0
T1_06_unt	Neutral|unknown2804	10	0.98578	0.98645	0.999935	0
T1_06_unt	Neutral|unknown276	10	0.98685	0.98745	0.999935	0
T1_06_unt	Neutral|unknown1249	10	0.99029	0.99045	0.999935	0
T1_06_unt	Neutral|unknown273	10	0.99203	0.99216	0.999935	0
T1_06_unt	Neutral|unknown612	10	0.99254	0.9927	0.999935	0
T1_06_unt	Neutral|unknown602	10	0.99568	0.99595	0.999935	0
T1_06_unt	Essential|STK11	5	0.99947	0.99945	0.999935	0
T1_06_unt	Neutral|unknown2376	10	0.99996	0.99994	0.999935	0
T3_035_tre	Essential|RPL18A	10	1.167e-11	4.9904e-06	0.000309	10
T3_035_tre	Essential|RPL8	10	1.511e-06	4.9904e-06	0.000309	9
T3_035_tre	Essential|EIF3G	5	1.9141e-06	1.4971e-05	0.000464	4
T3_035_tre	Essential|RPL23	10	3.6395e-06	1.4971e-05	0.000464	7
T3_035_tre	Essential|SNAPC5	5	9.3347e-06	6.4875e-05	0.001609	5
T3_035_tre	Essential|RPL30	10	1.3264e-05	8.4837e-05	0.001753	9
T3_035_tre	Essential|RPL13	8	2.439e-05	0.00020461	0.003624	6
T3_035_tre	Essential|RRM2B	5	4.0292e-05	0.00023455	0.003636	5
T3_035_tre	Essential|RPL21	10	0.00017858	0.0013025	0.016145	7
T3_035_tre	Essential|CCND1	5	0.00021268	0.0010729	0.014783	4
T3_035_tre	Essential|KARS	5	0.00028756	0.0014323	0.016145	5
T3_035_tre	Essential|ERCC1	5	0.00033243	0.0016618	0.017172	5
T3_035_tre	Essential|BECN1	5	0.00060328	0.0029094	0.027751	5
T3_035_tre	Neutral|unknown1486	10	0.001571	0.0094469	0.083672	7
T3_035_tre	Essential|PRDM1	5	0.0042164	0.016334	0.135025	4
T3_035_tre	Essential|PTEN	10	0.004709	0.0235	0.182124	5
T3_035_tre	Essential|RPL34	10	0.005315	0.026454	0.19296	6
T3_035_tre	Essential|DAG1	5	0.0089742	0.030486	0.210018	4
T3_035_tre	Neutral|unknown119	10	0.0092698	0.042793	0.27928	7
T3_035_tre	Essential|IK	5	0.015745	0.050298	0.31185	4
T3_035_tre	Essential|AKT1	5	0.017754	0.056017	0.33077	4
T3_035_tre	Essential|UCK1	5	0.028709	0.085122	0.458916	4
T3_035_tre	Essential|ING5	4	0.034149	0.083784	0.458916	3
T3_035_tre	Neutral|unknown2620	10	0.039926	0.13977	0.685525	6
T3_035_tre	Neutral|unknown2377	10	0.041213	0.14374	0.685525	5
T3_035_tre	Essential|PPIL2	5	0.054454	0.13444	0.685525	3
T3_035_tre	Essential|RPL23A	9	0.057621	0.17413	0.77115	4
T3_035_tre	Essential|USP24	5	0.073446	0.16687	0.766387	3
T3_035_tre	Essential|RPL14	10	0.08161	0.23219	0.992809	4
T3_035_tre	Neutral|unknown2578	10	0.090022	0.24935	0.997385	4
T3_035_tre	Essential|NFE2L2	5	0.12206	0.24934	0.997385	3
T3_035_tre	Neutral|unknown1248	10	0.13097	0.32947	0.998558	4
T3_035_tre	Essential|BRCA2	5	0.13284	0.26719	0.998558	3
T3_035_tre	Essential|EIF5B	5	0.16762	0.31902	0.998558	2
T3_035_tre	Neutral|unknown1119	10	0.17745	0.39788	0.998558	4
T3_035_tre	Essential|PPAP2C	5	0.19025	0.34016	0.998558	2
T3_035_tre	Essential|ETV6	4	0.20231	0.31957	0.998558	2
T3_035_tre	Essential|C1R	4	0.2387	0.36155	0.998558	2
T3_035_tre	Essential|NF1	5	0.23888	0.38694	0.998558	2
T3_035_tre	Neutral|unknown475	10	0.24544	0.48121	0.998558	3
T3_035_tre	Essential|SNRNP200	5	0.2492	0.3967	0.998558	2
T3_035_tre	Neutral|unknown278	10	0.25556	0.49321	0.998558	3
T3_035_tre	Essential|TP53	5	0.27679	0.42367	0.998558	2
T3_035_tre	Essential|HNRNPM	5	0.3001	0.44642	0.998558	2
T3_035_tre	Neutral|unknown1246	10	0.3016	0.54827	0.998558	3
T3_035_tre	Essential|SLC24A1	5	0.33386	0.47887	0.998558	2
T3_035_tre	Essential|RPL3	10	0.3361	0.58923	0.998558	3
T3_035_tre	Neutral|unknown276	10	0.33736	0.59073	0.998558	3
T3_035_tre	Neutral|unknown1480	10	0.37169	0.6196	0.998558	3
T3_035_tre	Essential|SMAD4	5	0.37257	0.51744	0.998558	2
T3_035_tre	Neutral|unknown2204	3	0.38255	0.43299	0.998558	1
T3_035_tre	Essential|ALDH16A1	5	0.39429	0.53968	0.998558	1
T3_035_tre	Essential|RPS15A	5	0.40696	0.55136	0.998558	2
T3_035_tre	Essential|ADAT1	5	0.42769	0.57171	0.998558	1
T3_035_tre	Essential|NHP2L1	5	0.43095	0.57476	0.998558	1
T3_035_tre	Neutral|unknown114	10	0.44628	0.67504	0.998558	3
T3_035_tre	Essential|RBM5	5	0.45174	0.59576	0.998558	2
T3_035_tre	Neutral|unknown2345	7	0.48811	0.65197	0.998558	2
T3_035_tre	Neutral|unknown1613	10	0.48815	0.70705	0.998558	3
T3_035_tre	Neutral|unknown2342	10	0.51235	0.72512	0.998558	3
T3_035_tre	Neutral|unknown1243	10	0.54142	0.74717	0.998558	1
T3_035_tre	Essential|H19	10	0.55376	0.7566	0.998558	3
T3_035_tre	Neutral|unknown847	10	0.57457	0.77296	0.998558	2
T3_035_tre	Essential|PTCH1	5	0.5886	0.66484	0.998558	1
T3_035_tre	Neutral|unknown604	10	0.59375	0.78848	0.998558	3
T3_035_tre	Essential|CLSTN3	5	0.59607	0.66849	0.998558	1
T3_035_tre	Neutral|unknown265	10	0.59743	0.79122	0.998558	2
T3_035_tre	Essential|SRGAP2	5	0.59853	0.66976	0.998558	1
T3_035_tre	Neutral|unknown275	10	0.64535	0.81678	0.998558	2
T3_035_tre	Essential|XPA	5	0.66494	0.70613	0.998558	1
T3_035_tre	Essential|EPHA2	4	0.66512	0.67562	0.998558	1
T3_035_tre	Neutral|unknown1045	10	0.6835	0.83273	0.998558	2
T3_035_tre	Neutral|unknown274	10	0.69421	0.83745	0.998558	1
T3_035_tre	Essential|LCP1	5	0.70152	0.729	0.998558	1
T3_035_tre	Essential|RB1	5	0.72042	0.74149	0.998558	1
T3_035_tre	Neutral|unknown1487	10	0.72757	0.85278	0.998558	2
T3_035_tre	Essential|MSMO1	5	0.73484	0.7517	0.998558	1
T3_035_tre	Neutral|unknown462	8	0.73758	0.8437	0.998558	2
T3_035_tre	Neutral|unknown1483	10	0.74547	0.86145	0.998558	2
T3_035_tre	Essential|STK11	5	0.75202	0.76426	0.998558	1
T3_035_tre	Essential|CLEC2B	5	0.76026	0.77014	0.998558	1
T3_035_tre	Neutral|unknown264	10	0.77278	0.87561	0.998558	2
T3_035_tre	Neutral|unknown1485	10	0.78768	0.88344	0.998558	2
T3_035_tre	Neutral|unknown273	10	0.78975	0.88469	0.998558	2
T3_035_tre	Essential|SERPINB8	5	0.79543	0.79918	0.998558	1
T3_035_tre	Neutral|unknown1479	10	0.80896	0.89529	0.998558	1
T3_035_tre	Neutral|unknown2805	10	0.81341	0.89791	0.998558	2
T3_035_tre	Neutral|unknown2375	10	0.81351	0.89799	0.998558	1
T3_035_tre	Neutral|unknown2199	10	0.81529	0.89922	0.998558	2
T3_035_tre	Neutral|unknown2201	10	0.82015	0.90207	0.998558	1
T3_035_tre	Neutral|unknown1065	10	0.82265	0.90361	0.998558	2
T3_035_tre	Neutral|unknown1115	10	0.82446	0.90473	0.998558	1
T3_035_tre	Essential|ATM	5	0.83254	0.83373	0.998558	0
T3_035_tre	Neutral|unknown600	8	0.85093	0.88305	0.998558	1
T3_035_tre	Essential|PLXNB2	5	0.85119	0.85278	0.998558	0
T3_035_tre	Neutral|unknown1587	10	0.8661	0.924	0.998558	1
T3_035_tre	Essential|FAM188A	5	0.87506	0.87769	0.998558	0
T3_035_tre	Neutral|unknown846	10	0.88915	0.93012	0.998558	1
T3_035_tre	Neutral|unknown2372	10	0.89055	0.9306	0.998558	1
T3_035_tre	Neutral|unknown464	10	0.91653	0.93935	0.998558	1
T3_035_tre	Neutral|unknown1114	10	0.92683	0.94326	0.998558	1
T3_035_tre	Neutral|unknown466	10	0.92779	0.94376	0.998558	1
T3_035_tre	Neutral|unknown2374	10	0.93154	0.94541	0.998558	1
T3_035_tre	Essential|KEAP1	5	0.93825	0.93924	0.998558	0
T3_035_tre	Neutral|unknown1249	10	0.94776	0.95378	0.998558	1
T3_035_tre	Neutral|unknown1488	10	0.95931	0.96152	0.998558	1
T3_035_tre	Neutral|unknown271	10	0.96468	0.96582	0.998558	1
T3_035_tre	Neutral|unknown1900	10	0.96851	0.96924	0.998558	1
T3_035_tre	Neutral|unknown3099	10	0.96984	0.97051	0.998558	1
T3_035_tre	Neutral|unknown612	10	0.97071	0.97115	0.998558	1
T3_035_tre	Neutral|unknown1905	10	0.97684	0.97715	0.998558	0
T3_035_tre	Neutral|unknown291	10	0.97914	0.97974	0.998558	0
T3_035_tre	Neutral|unknown2804	10	0.9839	0.9845	0.998558	0
T3_035_tre	Neutral|unknown1118	6	0.98522	0.98553	0.998558	0
T3_035_tre	Neutral|unknown2376	10	0.98556	0.98625	0.998558	0
T3_035_tre	Neutral|unknown2593	10	0.98726	0.98784	0.998558	0
T3_035_tre	Neutral|unknown465	10	0.98964	0.98998	0.998558	0
T3_035_tre	Neutral|unknown2370	10	0.99176	0.99189	0.998558	0
T3_035_tre	Neutral|unknown1066	10	0.99302	0.99317	0.998558	0
T3_035_tre	Neutral|unknown602	10	0.99459	0.99465	0.998558	0
T3_035_tre	Neutral|unknown2590	10	0.99512	0.99535	0.998558	0
T3_035_tre	Neutral|unknown1484	10	0.99664	0.99675	0.998558	0
T3_035_tre	Neutral|unknown2205	10	0.99687	0.99705	0.998558	0
T3_035_tre	Neutral|unknown288	10	0.99847	0.99856	0.998558	0
T3_035_unt	Essential|RPL18A	10	1.1807e-09	4.9904e-06	0.000619	10
T3_035_unt	Essential|RPL8	10	5.1113e-06	2.4952e-05	0.001547	8
T3_035_unt	Essential|SNAPC5	5	4.6531e-05	0.00024453	0.00789	5
T3_035_unt	Essential|RPL13	8	4.9187e-05	0.00040422	0.010025	6
T3_035_unt	Essential|EIF3G	5	5.5428e-05	0.00025451	0.00789	5
T3_035_unt	Essential|PTEN	10	0.00021157	0.001552	0.030399	9
T3_035_unt	Essential|RPL23	10	0.00027357	0.0019612	0.030399	7
T3_035_unt	Essential|KARS	5	0.00034683	0.0017217	0.030399	3
T3_035_unt	Essential|RPL30	10	0.0004923	0.0035582	0.049024	8
T3_035_unt	Essential|BECN1	5	0.0016252	0.0073908	0.091646	4
T3_035_unt	Essential|CCND1	5	0.0025669	0.011363	0.128094	4
T3_035_unt	Neutral|unknown119	10	0.0038259	0.020815	0.184362	7
T3_035_unt	Essential|UCK1	5	0.0039806	0.016942	0.173505	5
T3_035_unt	Essential|PRDM1	5	0.0043103	0.01819	0.173505	5
T3_035_unt	Neutral|unknown2377	10	0.0082444	0.040986	0.298959	5
T3_035_unt	Essential|ERCC1	5	0.0096344	0.035028	0.275642	4
T3_035_unt	Essential|DAG1	5	0.0098048	0.035567	0.275642	4
T3_035_unt	Essential|RPL21	10	0.011649	0.054381	0.374622	7
T3_035_unt	Essential|RPL34	10	0.018373	0.079492	0.492853	6
T3_035_unt	Essential|EIF5B	5	0.020803	0.066008	0.430791	4
T3_035_unt	Essential|RPL23A	9	0.037353	0.13388	0.723176	5
T3_035_unt	Essential|IK	5	0.038509	0.1113	0.657208	4
T3_035_unt	Essential|AKT1	5	0.050745	0.14151	0.731152	3
T3_035_unt	Essential|RPL14	10	0.051166	0.17733	0.835556	6
T3_035_unt	Essential|ING5	4	0.057024	0.13414	0.723176	3
T3_035_unt	Essential|SNRNP200	5	0.059898	0.16277	0.807351	3
T3_035_unt	Essential|RRM2B	5	0.071668	0.18194	0.835556	3
T3_035_unt	Neutral|unknown114	10	0.072292	0.22863	0.977573	6
T3_035_unt	Essential|RBM5	5	0.083703	0.20146	0.892172	2
T3_035_unt	Neutral|unknown1486	10	0.096609	0.28414	0.998578	5
T3_035_unt	Essential|ETV6	4	0.12377	0.25665	0.998578	2
T3_035_unt	Neutral|unknown1248	10	0.13285	0.35105	0.998578	4
T3_035_unt	Essential|TP53	5	0.13719	0.2834	0.998578	2
T3_035_unt	Essential|SLC24A1	5	0.14406	0.29327	0.998578	3
T3_035_unt	Essential|SMAD4	5	0.15839	0.31504	0.998578	3
T3_035_unt	Neutral|unknown1119	10	0.16288	0.39766	0.998578	4
T3_035_unt	Essential|NHP2L1	5	0.17335	0.33673	0.998578	3
T3_035_unt	Neutral|unknown2620	10	0.18399	0.42836	0.998578	4
T3_035_unt	Essential|PPIL2	5	0.19657	0.3699	0.998578	3
T3_035_unt	Neutral|unknown1246	10	0.19895	0.44964	0.998578	4
T3_035_unt	Essential|CLEC2B	5	0.20449	0.38126	0.998578	2
T3_035_unt	Essential|CLSTN3	5	0.20962	0.38832	0.998578	3
T3_035_unt	Essential|RPL3	10	0.2107	0.46686	0.998578	5
T3_035_unt	Essential|BRCA2	5	0.21571	0.39696	0.998578	3
T3_035_unt	Essential|PPAP2C	5	0.22186	0.40554	0.998578	3
T3_035_unt	Essential|KEAP1	5	0.22414	0.40895	0.998578	1
T3_035_unt	Neutral|unknown2204	3	0.22441	0.34305	0.998578	2
T3_035_unt	Essential|ALDH16A1	5	0.23122	0.41866	0.998578	3
T3_035_unt	Essential|ADAT1	5	0.23478	0.42311	0.998578	2
T3_035_unt	Neutral|unknown1487	10	0.24616	0.51534	0.998578	3
T3_035_unt	Neutral|unknown1480	10	0.26553	0.54053	0.998578	5
T3_035_unt	Neutral|unknown2578	10	0.2738	0.5521	0.998578	4
T3_035_unt	Essential|ATM	5	0.28463	0.47424	0.998578	1
T3_035_unt	Essential|USP24	5	0.35105	0.527	0.998578	2
T3_035_unt	Essential|STK11	5	0.35935	0.53404	0.998578	1
T3_035_unt	Neutral|unknown1065	10	0.35994	0.63243	0.998578	4
T3_035_unt	Essential|RPS15A	5	0.36181	0.53596	0.998578	2
T3_035_unt	Neutral|unknown1479	10	0.38193	0.6518	0.998578	4
T3_035_unt	Essential|EPHA2	4	0.38599	0.5321	0.998578	2
T3_035_unt	Neutral|unknown1613	10	0.39155	0.66053	0.998578	3
T3_035_unt	Neutral|unknown2342	10	0.4296	0.6938	0.998578	3
T3_035_unt	Neutral|unknown291	10	0.4349	0.69847	0.998578	3
T3_035_unt	Essential|C1R	4	0.43973	0.58653	0.998578	2
T3_035_unt	Neutral|unknown1066	10	0.4993	0.75335	0.998578	2
T3_035_unt	Essential|HNRNPM	5	0.51057	0.65879	0.998578	2
T3_035_unt	Neutral|unknown1115	10	0.5124	0.76409	0.998578	4
T3_035_unt	Neutral|unknown1485	10	0.54142	0.78192	0.998578	2
T3_035_unt	Essential|LCP1	5	0.54479	0.68784	0.998578	2
T3_035_unt	Neutral|unknown1249	10	0.55667	0.78992	0.998578	3
T3_035_unt	Essential|FAM188A	5	0.56074	0.70212	0.998578	2
T3_035_unt	Neutral|unknown278	10	0.56454	0.79415	0.998578	3
T3_035_unt	Neutral|unknown265	10	0.5679	0.79628	0.998578	3
T3_035_unt	Essential|MSMO1	5	0.56864	0.70897	0.998578	2
T3_035_unt	Essential|NFE2L2	5	0.5706	0.71059	0.998578	2
T3_035_unt	Neutral|unknown2372	10	0.57088	0.79779	0.998578	3
T3_035_unt	Neutral|unknown2205	10	0.57109	0.79786	0.998578	3
T3_035_unt	Essential|SERPINB8	5	0.57843	0.71743	0.998578	2
T3_035_unt	Neutral|unknown2375	10	0.58032	0.80287	0.998578	1
T3_035_unt	Neutral|unknown2201	10	0.58772	0.80721	0.998578	2
T3_035_unt	Neutral|unknown264	10	0.59654	0.81188	0.998578	3
T3_035_unt	Neutral|unknown1483	10	0.6021	0.81493	0.998578	3
T3_035_unt	Neutral|unknown1587	10	0.64686	0.8395	0.998578	3
T3_035_unt	Essential|NF1	5	0.66706	0.75876	0.998578	1
T3_035_unt	Neutral|unknown475	10	0.6672	0.84975	0.998578	3
T3_035_unt	Essential|H19	10	0.67986	0.85664	0.998578	1
T3_035_unt	Essential|XPA	5	0.68365	0.76584	0.998578	1
T3_035_unt	Neutral|unknown275	10	0.68711	0.86081	0.998578	2
T3_035_unt	Neutral|unknown271	10	0.70815	0.8723	0.998578	2
T3_035_unt	Neutral|unknown464	10	0.71228	0.87471	0.998578	3
T3_035_unt	Neutral|unknown602	10	0.72153	0.88028	0.998578	3
T3_035_unt	Neutral|unknown1243	10	0.72601	0.88318	0.998578	2
T3_035_unt	Neutral|unknown465	10	0.73384	0.88733	0.998578	2
T3_035_unt	Neutral|unknown846	10	0.73692	0.88892	0.998578	1
T3_035_unt	Neutral|unknown847	10	0.7407	0.89106	0.998578	2
T3_035_unt	Essential|PTCH1	5	0.773	0.80858	0.998578	1
T3_035_unt	Neutral|unknown604	10	0.7835	0.91025	0.998578	2
T3_035_unt	Neutral|unknown612	10	0.79223	0.91295	0.998578	1
T3_035_unt	Neutral|unknown462	8	0.7944	0.88748	0.998578	2
T3_035_unt	Neutral|unknown2376	10	0.79586	0.91405	0.998578	2
T3_035_unt	Neutral|unknown600	8	0.80796	0.89509	0.998578	2
T3_035_unt	Neutral|unknown274	10	0.81715	0.92082	0.998578	2
T3_035_unt	Neutral|unknown1045	10	0.82979	0.92499	0.998578	2
T3_035_unt	Neutral|unknown2374	10	0.83154	0.92569	0.998578	2
T3_035_unt	Neutral|unknown276	10	0.8328	0.9261	0.998578	2
T3_035_unt	Essential|RB1	5	0.83376	0.8457	0.998578	1
T3_035_unt	Neutral|unknown1488	10	0.84079	0.92892	0.998578	2
T3_035_unt	Neutral|unknown2345	7	0.86715	0.9046	0.998578	1
T3_035_unt	Neutral|unknown1484	10	0.89732	0.95212	0.998578	1
T3_035_unt	Neutral|unknown2593	10	0.90273	0.95464	0.998578	2
T3_035_unt	Neutral|unknown2805	10	0.90718	0.9568	0.998578	2
T3_035_unt	Essential|SRGAP2	5	0.91785	0.91918	0.998578	0
T3_035_unt	Neutral|unknown2199	10	0.92286	0.96467	0.998578	1
T3_035_unt	Neutral|unknown1905	10	0.94253	0.96981	0.998578	1
T3_035_unt	Neutral|unknown1118	6	0.94863	0.94976	0.998578	0
T3_035_unt	Neutral|unknown1900	10	0.95322	0.97232	0.998578	1
T3_035_unt	Essential|PLXNB2	5	0.95933	0.95964	0.998578	0
T3_035_unt	Neutral|unknown273	10	0.96044	0.97456	0.998578	1
T3_035_unt	Neutral|unknown2804	10	0.97155	0.97862	0.998578	1
T3_035_unt	Neutral|unknown1114	10	0.98664	0.98738	0.998578	1
T3_035_unt	Neutral|unknown2370	10	0.98823	0.98871	0.998578	1
T3_035_unt	Neutral|unknown3099	10	0.9943	0.99442	0.998578	0
T3_035_unt	Neutral|unknown466	10	0.99504	0.99528	0.998578	0
T3_035_unt	Neutral|unknown288	10	0.99767	0.99773	0.998578	0
T3_035_unt	Neutral|unknown2590	10	0.9985	0.99858	0.998578	0
T3_06_tre	Essential|CCND1	5	5.6743e-06	4.4914e-05	0.002785	5
T3_06_tre	Essential|RPL18A	10	8.4974e-06	3.4933e-05	0.002785	6
T3_06_tre	Essential|EIF3G	5	2.5604e-05	0.0001547	0.006394	4
T3_06_tre	Essential|RPL30	10	9.8502e-05	0.00053397	0.016553	4
T3_06_tre	Essential|RPL8	10	0.00046186	0.0023106	0.057302	5
T3_06_tre	Essential|RPL23	10	0.0013194	0.0059236	0.122422	5
T3_06_tre	Essential|RPL3	10	0.001868	0.0076204	0.13436	4
T3_06_tre	Essential|BECN1	5	0.003067	0.0086684	0.13436	3
T3_06_tre	Essential|SNAPC5	5	0.0038041	0.010605	0.146108	2
T3_06_tre	Essential|RPL13	8	0.0038744	0.012501	0.155012	3
T3_06_tre	Essential|AKT1	5	0.0068247	0.017921	0.202014	3
T3_06_tre	Essential|PTEN	10	0.0072708	0.02361	0.243967	4
T3_06_tre	Essential|RPS15A	5	0.01773	0.036545	0.348581	1
T3_06_tre	Essential|DAG1	5	0.031567	0.058123	0.514807	2
T3_06_tre	Neutral|unknown275	10	0.034723	0.083575	0.647703	2
T3_06_tre	Essential|RBM5	5	0.038994	0.07056	0.583292	2
T3_06_tre	Essential|RPL21	10	0.039161	0.092697	0.653018	2
T3_06_tre	Neutral|unknown1486	10	0.048507	0.11125	0.688266	3
T3_06_tre	Essential|IK	5	0.054488	0.094793	0.653018	2
T3_06_tre	Essential|RPL14	10	0.064381	0.14172	0.798802	2
T3_06_tre	Essential|ATM	5	0.067796	0.11449	0.688266	2
T3_06_tre	Essential|PRDM1	5	0.069189	0.11656	0.688266	2
T3_06_tre	Essential|KARS	5	0.16406	0.19283	0.999985	1
T3_06_tre	Essential|UCK1	5	0.17286	0.19929	0.999985	1
T3_06_tre	Essential|PPIL2	5	0.18159	0.20591	0.999985	1
T3_06_tre	Essential|TP53	5	0.19455	0.21598	0.999985	1
T3_06_tre	Essential|RPL23A	9	0.21123	0.31483	0.999985	1
T3_06_tre	Essential|SERPINB8	5	0.21577	0.23318	0.999985	1
T3_06_tre	Essential|LCP1	5	0.21997	0.23639	0.999985	1
T3_06_tre	Essential|ING5	4	0.23172	0.2356	0.999985	1
T3_06_tre	Essential|ERCC1	5	0.28463	0.29194	0.999985	1
T3_06_tre	Essential|RB1	5	0.3001	0.30603	0.999985	1
T3_06_tre	Essential|RRM2B	5	0.30774	0.31267	0.999985	1
T3_06_tre	Essential|CLEC2B	5	0.31153	0.316	0.999985	1
T3_06_tre	Essential|SMAD4	5	0.33025	0.33325	0.999985	1
T3_06_tre	Essential|MSMO1	5	0.33394	0.33667	0.999985	1
T3_06_tre	Essential|SRGAP2	5	0.37	0.37186	0.999985	1
T3_06_tre	Neutral|unknown2204	3	0.38698	0.38701	0.999985	0
T3_06_tre	Neutral|unknown1065	10	0.39804	0.44772	0.999985	1
T3_06_tre	Essential|ETV6	4	0.4028	0.39967	0.999985	0
T3_06_tre	Neutral|unknown604	10	0.40447	0.45152	0.999985	1
T3_06_tre	Essential|PTCH1	5	0.41118	0.41273	0.999985	0
T3_06_tre	Essential|USP24	5	0.41451	0.41615	0.999985	0
T3_06_tre	Neutral|unknown2620	10	0.44178	0.47586	0.999985	1
T3_06_tre	Essential|C1R	4	0.44332	0.44071	0.999985	0
T3_06_tre	Neutral|unknown2590	10	0.44778	0.48012	0.999985	1
T3_06_tre	Neutral|unknown1900	10	0.47696	0.50121	0.999985	1
T3_06_tre	Essential|HNRNPM	5	0.496	0.49653	0.999985	0
T3_06_tre	Essential|EPHA2	4	0.51578	0.51446	0.999985	0
T3_06_tre	Essential|BRCA2	5	0.53041	0.53132	0.999985	0
T3_06_tre	Neutral|unknown1479	10	0.5312	0.54267	0.999985	1
T3_06_tre	Neutral|unknown1119	10	0.53633	0.54699	0.999985	1
T3_06_tre	Neutral|unknown274	10	0.57562	0.5803	0.999985	1
T3_06_tre	Essential|RPL34	10	0.58032	0.58429	0.999985	1
T3_06_tre	Essential|ADAT1	5	0.61782	0.61786	0.999985	0
T3_06_tre	Neutral|unknown2205	10	0.62476	0.6255	0.999985	1
T3_06_tre	Neutral|unknown278	10	0.62896	0.62979	0.999985	1
T3_06_tre	Neutral|unknown1248	10	0.64131	0.64242	0.999985	0
T3_06_tre	Essential|FAM188A	5	0.65198	0.65294	0.999985	0
T3_06_tre	Essential|NHP2L1	5	0.65417	0.65514	0.999985	0
T3_06_tre	Essential|EIF5B	5	0.65634	0.65738	0.999985	0
T3_06_tre	Neutral|unknown1487	10	0.66108	0.66174	0.999985	0
T3_06_tre	Essential|KEAP1	5	0.66917	0.66957	0.999985	0
T3_06_tre	Neutral|unknown1249	10	0.67618	0.67737	0.999985	0
T3_06_tre	Essential|CLSTN3	5	0.67751	0.67807	0.999985	0
T3_06_tre	Neutral|unknown1613	10	0.6835	0.68496	0.999985	0
T3_06_tre	Neutral|unknown264	10	0.69068	0.69222	0.999985	0
T3_06_tre	Neutral|unknown2377	10	0.69421	0.69567	0.999985	0
T3_06_tre	Neutral|unknown119	10	0.6977	0.69941	0.999985	0
T3_06_tre	Neutral|unknown2372	10	0.71464	0.71632	0.999985	0
T3_06_tre	Neutral|unknown291	10	0.72757	0.72924	0.999985	0
T3_06_tre	Neutral|unknown1045	10	0.75763	0.75929	0.999985	0
T3_06_tre	Essential|XPA	5	0.773	0.77404	0.999985	0
T3_06_tre	Neutral|unknown1480	10	0.77685	0.77851	0.999985	0
T3_06_tre	Essential|NFE2L2	5	0.78668	0.78776	0.999985	0
T3_06_tre	Essential|SNRNP200	5	0.79255	0.7939	0.999985	0
T3_06_tre	Neutral|unknown2593	10	0.7947	0.79661	0.999985	0
T3_06_tre	Neutral|unknown1243	10	0.79714	0.79891	0.999985	0
T3_06_tre	Neutral|unknown2375	10	0.80194	0.8038	0.999985	0
T3_06_tre	Neutral|unknown2345	7	0.80216	0.80137	0.999985	0
T3_06_tre	Neutral|unknown465	10	0.80664	0.8081	0.999985	0
T3_06_tre	Neutral|unknown466	10	0.81124	0.81272	0.999985	0
T3_06_tre	Neutral|unknown265	10	0.81351	0.81489	0.999985	0
T3_06_tre	Neutral|unknown271	10	0.81575	0.81714	0.999985	0
T3_06_tre	Neutral|unknown1118	6	0.81983	0.82171	0.999985	0
T3_06_tre	Essential|NF1	5	0.82254	0.82373	0.999985	0
T3_06_tre	Neutral|unknown276	10	0.82868	0.83032	0.999985	0
T3_06_tre	Neutral|unknown2805	10	0.83075	0.83231	0.999985	0
T3_06_tre	Essential|SLC24A1	5	0.83376	0.8349	0.999985	0
T3_06_tre	Essential|ALDH16A1	5	0.85667	0.85836	0.999985	0
T3_06_tre	Neutral|unknown847	10	0.86442	0.86529	0.999985	0
T3_06_tre	Neutral|unknown2578	10	0.88485	0.8858	0.999985	0
T3_06_tre	Neutral|unknown2374	10	0.89732	0.89813	0.999985	0
T3_06_tre	Essential|PLXNB2	5	0.89987	0.90137	0.999985	0
T3_06_tre	Neutral|unknown1485	10	0.90495	0.9056	0.999985	0
T3_06_tre	Neutral|unknown464	10	0.90617	0.90675	0.999985	0
T3_06_tre	Essential|STK11	5	0.91144	0.91279	0.999985	0
T3_06_tre	Neutral|unknown2342	10	0.9208	0.92113	0.999985	0
T3_06_tre	Neutral|unknown114	10	0.92779	0.92785	0.999985	0
T3_06_tre	Neutral|unknown288	10	0.92969	0.92973	0.999985	0
T3_06_tre	Neutral|unknown2370	10	0.9351	0.93511	0.999985	0
T3_06_tre	Neutral|unknown612	10	0.93597	0.93616	0.999985	0
T3_06_tre	Neutral|unknown1488	10	0.93682	0.93707	0.999985	0
T3_06_tre	Neutral|unknown2201	10	0.9385	0.93875	0.999985	0
T3_06_tre	Neutral|unknown602	10	0.94014	0.94037	0.999985	0
T3_06_tre	Neutral|unknown1246	10	0.94095	0.94105	0.999985	0
T3_06_tre	Neutral|unknown1905	10	0.94776	0.94755	0.999985	0
T3_06_tre	Essential|H19	10	0.95123	0.95112	0.999985	0
T3_06_tre	Neutral|unknown600	8	0.95585	0.9556	0.999985	0
T3_06_tre	Neutral|unknown462	8	0.96544	0.9653	0.999985	0
T3_06_tre	Essential|PPAP2C	5	0.96859	0.96844	0.999985	0
T3_06_tre	Neutral|unknown1066	10	0.97155	0.97187	0.999985	0
T3_06_tre	Neutral|unknown1483	10	0.97196	0.9722	0.999985	0
T3_06_tre	Neutral|unknown1587	10	0.97752	0.9778	0.999985	0
T3_06_tre	Neutral|unknown3099	10	0.98685	0.98745	0.999985	0
T3_06_tre	Neutral|unknown846	10	0.98931	0.98961	0.999985	0
T3_06_tre	Neutral|unknown2199	10	0.99029	0.99045	0.999985	0
T3_06_tre	Neutral|unknown2376	10	0.99302	0.99317	0.999985	0
T3_06_tre	Neutral|unknown1114	10	0.99421	0.99437	0.999985	0
T3_06_tre	Neutral|unknown1484	10	0.99521	0.99545	0.999985	0
T3_06_tre	Neutral|unknown1115	10	0.99861	0.99866	0.999985	0
T3_06_tre	Neutral|unknown475	10	0.99907	0.99909	0.999985	0
T3_06_tre	Neutral|unknown2804	10	0.99909	0.99911	0.999985	0
T3_06_tre	Neutral|unknown273	10	0.99999	0.99999	0.999985	0
T3_06_unt	Essential|RPL18A	10	9.52e-07	4.9904e-06	0.000619	8
T3_06_unt	Essential|RPL30	10	8.679e-05	0.00063378	0.026196	8
T3_06_unt	Essential|EIF3G	5	0.00010215	0.00051401	0.026196	4
T3_06_unt	Essential|RPL13	8	0.00025212	0.0014722	0.045637	6
T3_06_unt	Essential|RPL23	10	0.00044169	0.0029992	0.061984	8
T3_06_unt	Essential|SNAPC5	5	0.00054829	0.0026998	0.061984	4
T3_06_unt	Essential|CCND1	5	0.0013528	0.0062231	0.110237	5
T3_06_unt	Essential|UCK1	5	0.0023166	0.010395	0.152847	5
T3_06_unt	Essential|BECN1	5	0.0025025	0.011094	0.152847	4
T3_06_unt	Essential|PPIL2	5	0.0029393	0.01278	0.158478	3
T3_06_unt	Essential|PTEN	10	0.012789	0.057445	0.57218	7
T3_06_unt	Essential|AKT1	5	0.014125	0.046017	0.518733	4
T3_06_unt	Essential|RBM5	5	0.020803	0.064531	0.57218	4
T3_06_unt	Essential|NHP2L1	5	0.020822	0.064601	0.57218	3
T3_06_unt	Neutral|unknown1119	10	0.024097	0.094434	0.775735	5
T3_06_unt	Neutral|unknown2377	10	0.034259	0.12483	0.78128	6
T3_06_unt	Essential|BRCA2	5	0.036187	0.10474	0.775735	3
T3_06_unt	Essential|KARS	5	0.036787	0.10635	0.775735	3
T3_06_unt	Essential|RPL8	10	0.041461	0.14525	0.78128	5
T3_06_unt	Essential|RPL21	10	0.041532	0.14538	0.78128	5
T3_06_unt	Essential|RPL3	10	0.046239	0.15824	0.78128	5
T3_06_unt	Essential|RPL23A	9	0.047228	0.15375	0.78128	5
T3_06_unt	Essential|IK	5	0.050021	0.13164	0.78128	3
T3_06_unt	Neutral|unknown275	10	0.053715	0.17895	0.78128	4
T3_06_unt	Essential|ATM	5	0.057313	0.14429	0.78128	2
T3_06_unt	Essential|ERCC1	5	0.065636	0.1578	0.78128	3
T3_06_unt	Essential|CLSTN3	5	0.077995	0.17901	0.78128	3
T3_06_unt	Essential|CLEC2B	5	0.081396	0.18465	0.78128	2
T3_06_unt	Essential|DAG1	5	0.083652	0.18859	0.78128	3
T3_06_unt	Essential|PRDM1	5	0.086153	0.19298	0.78128	2
T3_06_unt	Essential|SERPINB8	5	0.087542	0.19532	0.78128	3
T3_06_unt	Essential|C1R	4	0.096992	0.2086	0.808342	3
T3_06_unt	Neutral|unknown2372	10	0.11726	0.30669	0.998638	4
T3_06_unt	Essential|RPS15A	5	0.1189	0.24611	0.924786	2
T3_06_unt	Essential|MSMO1	5	0.1304	0.26508	0.966748	3
T3_06_unt	Neutral|unknown1065	10	0.13849	0.34527	0.998638	4
T3_06_unt	Essential|ADAT1	5	0.14027	0.28084	0.994961	3
T3_06_unt	Neutral|unknown2620	10	0.17871	0.41357	0.998638	5
T3_06_unt	Neutral|unknown1486	10	0.19064	0.42934	0.998638	4
T3_06_unt	Neutral|unknown1248	10	0.20346	0.44424	0.998638	4
T3_06_unt	Essential|PTCH1	5	0.20734	0.37241	0.998638	1
T3_06_unt	Essential|XPA	5	0.21047	0.37524	0.998638	2
T3_06_unt	Essential|EIF5B	5	0.22458	0.38835	0.998638	2
T3_06_unt	Neutral|unknown602	10	0.23253	0.47658	0.998638	4
T3_06_unt	Neutral|unknown264	10	0.2501	0.49591	0.998638	3
T3_06_unt	Neutral|unknown119	10	0.25556	0.502	0.998638	2
T3_06_unt	Essential|SMAD4	5	0.2848	0.44317	0.998638	2
T3_06_unt	Neutral|unknown2345	7	0.28814	0.49217	0.998638	3
T3_06_unt	Essential|KEAP1	5	0.29626	0.45382	0.998638	1
T3_06_unt	Neutral|unknown271	10	0.30083	0.55259	0.998638	4
T3_06_unt	Neutral|unknown2578	10	0.32066	0.57439	0.998638	3
T3_06_unt	Neutral|unknown465	10	0.32148	0.57527	0.998638	3
T3_06_unt	Neutral|unknown2374	10	0.33728	0.59298	0.998638	1
T3_06_unt	Neutral|unknown462	8	0.34318	0.56652	0.998638	3
T3_06_unt	Neutral|unknown1118	6	0.35258	0.5383	0.998638	1
T3_06_unt	Essential|LCP1	5	0.35965	0.51178	0.998638	2
T3_06_unt	Neutral|unknown2375	10	0.36097	0.6185	0.998638	3
T3_06_unt	Neutral|unknown2205	10	0.36542	0.62335	0.998638	4
T3_06_unt	Neutral|unknown1243	10	0.38746	0.64605	0.998638	4
T3_06_unt	Neutral|unknown1905	10	0.38858	0.64718	0.998638	2
T3_06_unt	Essential|TP53	5	0.39408	0.54448	0.998638	2
T3_06_unt	Neutral|unknown265	10	0.39638	0.65557	0.998638	3
T3_06_unt	Essential|RB1	5	0.40783	0.55647	0.998638	1
T3_06_unt	Neutral|unknown604	10	0.41084	0.66603	0.998638	2
T3_06_unt	Essential|RPL34	10	0.43109	0.67981	0.998638	2
T3_06_unt	Essential|RRM2B	5	0.44063	0.5868	0.998638	1
T3_06_unt	Neutral|unknown274	10	0.44203	0.68719	0.998638	3
T3_06_unt	Essential|SNRNP200	5	0.44383	0.58983	0.998638	1
T3_06_unt	Neutral|unknown1900	10	0.44628	0.69022	0.998638	3
T3_06_unt	Neutral|unknown1485	10	0.46546	0.70305	0.998638	2
T3_06_unt	Neutral|unknown114	10	0.46981	0.70639	0.998638	3
T3_06_unt	Essential|PLXNB2	5	0.47196	0.61637	0.998638	1
T3_06_unt	Neutral|unknown1045	10	0.47287	0.70842	0.998638	3
T3_06_unt	Essential|SRGAP2	5	0.47502	0.6192	0.998638	1
T3_06_unt	Neutral|unknown288	10	0.5302	0.74716	0.998638	2
T3_06_unt	Neutral|unknown2593	10	0.55144	0.76177	0.998638	3
T3_06_unt	Essential|RPL14	10	0.57562	0.77869	0.998638	2
T3_06_unt	Essential|H19	10	0.59094	0.78991	0.998638	3
T3_06_unt	Neutral|unknown278	10	0.59375	0.79182	0.998638	3
T3_06_unt	Neutral|unknown2204	3	0.59595	0.6027	0.998638	1
T3_06_unt	Neutral|unknown1479	10	0.59743	0.79426	0.998638	2
T3_06_unt	Neutral|unknown475	10	0.59933	0.79565	0.998638	3
T3_06_unt	Essential|ETV6	4	0.59972	0.63941	0.998638	1
T3_06_unt	Essential|NF1	5	0.61068	0.69472	0.998638	1
T3_06_unt	Essential|EPHA2	4	0.61391	0.64819	0.998638	1
T3_06_unt	Neutral|unknown2342	10	0.62669	0.81527	0.998638	3
T3_06_unt	Essential|USP24	5	0.62718	0.70234	0.998638	1
T3_06_unt	Neutral|unknown1480	10	0.65051	0.83176	0.998638	3
T3_06_unt	Neutral|unknown1249	10	0.66339	0.84039	0.998638	3
T3_06_unt	Neutral|unknown1483	10	0.67005	0.84305	0.998638	2
T3_06_unt	Neutral|unknown1115	10	0.67287	0.84409	0.998638	2
T3_06_unt	Neutral|unknown1587	10	0.70025	0.85399	0.998638	2
T3_06_unt	Essential|ALDH16A1	5	0.71109	0.74723	0.998638	1
T3_06_unt	Essential|ING5	4	0.72682	0.73232	0.998638	1
T3_06_unt	Neutral|unknown1114	10	0.73692	0.86831	0.998638	1
T3_06_unt	Neutral|unknown1487	10	0.74547	0.87186	0.998638	2
T3_06_unt	Neutral|unknown466	10	0.74894	0.87321	0.998638	1
T3_06_unt	Essential|SLC24A1	5	0.78963	0.79969	0.998638	1
T3_06_unt	Neutral|unknown847	10	0.80769	0.89987	0.998638	2
T3_06_unt	Neutral|unknown1246	10	0.82232	0.90724	0.998638	1
T3_06_unt	Neutral|unknown1066	10	0.82265	0.90747	0.998638	2
T3_06_unt	Neutral|unknown2370	10	0.82446	0.90849	0.998638	2
T3_06_unt	Neutral|unknown291	10	0.83328	0.91324	0.998638	2
T3_06_unt	Essential|FAM188A	5	0.83737	0.839	0.998638	1
T3_06_unt	Essential|HNRNPM	5	0.84209	0.84377	0.998638	1
T3_06_unt	Neutral|unknown1488	10	0.86074	0.92843	0.998638	2
T3_06_unt	Essential|NFE2L2	5	0.86198	0.86366	0.998638	0
T3_06_unt	Neutral|unknown1613	10	0.86776	0.93255	0.998638	1
T3_06_unt	Neutral|unknown846	10	0.87237	0.93553	0.998638	2
T3_06_unt	Neutral|unknown464	10	0.896	0.94235	0.998638	1
T3_06_unt	Neutral|unknown600	8	0.90258	0.91667	0.998638	1
T3_06_unt	Neutral|unknown2590	10	0.93423	0.95328	0.998638	1
T3_06_unt	Essential|STK11	5	0.93602	0.93705	0.998638	0
T3_06_unt	Essential|PPAP2C	5	0.94042	0.94114	0.998638	0
T3_06_unt	Neutral|unknown3099	10	0.94918	0.9594	0.998638	1
T3_06_unt	Neutral|unknown612	10	0.96567	0.96869	0.998638	1
T3_06_unt	Neutral|unknown276	10	0.97196	0.97293	0.998638	1
T3_06_unt	Neutral|unknown2201	10	0.98007	0.98055	0.998638	0
T3_06_unt	Neutral|unknown2376	10	0.9834	0.98402	0.998638	0
T3_06_unt	Neutral|unknown273	10	0.994	0.99415	0.998638	0
T3_06_unt	Neutral|unknown2199	10	0.99486	0.99504	0.998638	0
T3_06_unt	Neutral|unknown1484	10	0.99704	0.99719	0.998638	0
T3_06_unt	Neutral|unknown2805	10	0.99749	0.99754	0.998638	0
T3_06_unt	Neutral|unknown2804	10	0.99856	0.99864	0.998638	0
